# Supplementary material for: Reciprocal analyses in zebrafish and medaka reveal that harnessing the immune response promotes cardiac regeneration
Source: eLife. 2017 Jun 20;6:e25605. doi: 10.7554/eLife.25605 (PMC5498136; doi:10.7554/eLife.25605)
Supplement: Figure 3—figure supplement 1—source data 1. — DOI: http://dx.doi.org/10.7554/eLife.25605.008 [file elife-25605-fig3-figsupp1-data1.xlsx]

## Sheet: Figure 3-S1
	% of Mpx+ in GFP+ cells
	0.888889
	0.875
	0.881579		Mpx+/GFP+	Mpx-/GFP+
AVG	0.881823	%	88	12
STDEV	0.00567273
