# Supplementary material for: Reciprocal analyses in zebrafish and medaka reveal that harnessing the immune response promotes cardiac regeneration
Source: eLife. 2017 Jun 20;6:e25605. doi: 10.7554/eLife.25605 (PMC5498136; doi:10.7554/eLife.25605)
Supplement: Figure 3—source data 1. — DOI: http://dx.doi.org/10.7554/eLife.25605.006 [file elife-25605-fig3-data1.xlsx]

## Sheet: Figure 3 immune cell
zebrafish		6h-1		6h-2		6h-3	6h-AVG	6h-STDEV		Medaka		6h-1		6h-2		6h-3	6h-AVG	6h-STDEV		zebrafish	6h-1	6h-2	6h-3	6h-AVG	6h-STDEV			Medaka	6h-1	6h-2	6h-3	6h-AVG	6h-STDEV	P
M	0	0	4	11.6449	8	40.7972	17.4807	17.159		M	0	0	5	23.4861	2	4.94863	9.47824	10.109			1.02707	18.4107	17.1328	12.1902	7.91074				8.42361	13.2801	9.1589	10.2875	2.13724	0.759104
N	28	138.873	14	40.7573	17	86.694	88.7748	40.0826		N	73	137.718	5	23.4861	11	27.2175	62.8071	52.9917			44.1639	62.3131	53.414	53.297	7.40986				64.581	15.1772	36.6356	38.7979	20.2269	0.395061
injury site	0.201623		0.343497		0.196092					injury site	0.53007		0.212892		0.404152
M	1	1.2953	9	24.8198	9	11.3043	12.4731	9.63933		M	12	13.4153	2	6.36511	8	11.6333	10.4712	2.99324
N	15	19.4295	30	82.7326	36	45.2172	49.1264	25.9908		N	19	21.241	3	9.54766	29	42.1707	24.3198	13.495
Rest	0.772023		0.362614		0.796157					Rest	0.894498		0.314213		0.687682
zebrafish		2d-1		2d-2		2d-3	2d-AVG	2d-STDEV		Medaka		2d-1		2d-2		2d-3	2d-AVG	2d-STDEV		zebrafish	2d-1	2d-2	2d-3	2d-AVG	2d-STDEV			Medaka	2d-1	2d-2	2d-3	2d-AVG	2d-STDEV
M	12	46.962	5	28.2444	7	25.4831	33.5632	9.54121		M	11	28.1423	9	18.9408	0	0	15.6944	11.7162			19.7662	11.1553	18.625	16.5155	3.81879				19.4214	26.8107	5.33829	17.1901	8.90691	0.926316
N	53	207.415	10	56.4889	34	123.775	129.226	61.7359		N	76	194.438	100	210.454	104	139.234	181.375	30.5071			103.575	34.48	74.5002	70.8517	28.3257				89.5891	130.223	99.2921	106.368	17.3269	0.204912
injury site	0.255526		0.177026		0.274692					injury site	0.39087		0.475164		0.746942
M	13	12.8808	6	7.41607	13	16.2677	12.1882	3.64669		M	20	16.5933	19	33.3804	10	8.87849	19.6174	10.2289
N	78	77.2846	24	29.6643	46	57.5625	54.8371	19.5362		N	67	55.5875	36	63.247	82	72.8036	63.8794	7.04263
Rest	1.00926		0.809054		0.799131					Rest	1.20531		0.569197		1.12632
zebrafish		7d-1		7d-2		7d-3	7d-AVG	7d-STDEV		Medaka		7d-1		7d-2		7d-3	7d-AVG	7d-STDEV		zebrafish	7d-1	7d-2	7d-3	7d-AVG	7d-STDEV			Medaka	7d-1	7d-2	7d-3	7d-AVG	7d-STDEV
M	28	77.589	16	38.7047	11	53.3217	56.5385	16.0366		M	4	12.0149	4	8.64897	5	20.01	13.558	4.76473			36.0655	15.2261	22.9232	24.7383	8.60391				8.82971	4.16816	28.6313	13.8764	10.6054	0.3236
N	14	38.7945	27	65.3143	10	48.4743	50.861	10.9574		N	54	162.202	26	56.2183	33	132.066	116.829	44.5889			27.6502	44.7826	32.7474	35.0601	7.18292				105.957	30.0108	62.5646	66.1773	31.1098	0.240186
injury site	0.360876		0.413386		0.206295					injury site	0.332919		0.462483		0.249875
M	2	4.24679	1	1.42224	3	7.41765	4.36222	2.44898		M	7	7.66808	1	1.35669	22	31.7392	13.588	13.0909
N	9	19.1106	23	32.7114	10	24.7255	25.5158	5.58059		N	78	85.4443	10	13.5669	26	37.5099	45.5071	29.8837
Rest	0.470944		0.703118		0.404441					Rest	0.912875		0.737086		0.69315
		Zebrafish					Medaka
		6h-1	6h-2	6h-3	6h-AVG	6h-STDEV	6h-1	6h-2	6h-3	6h-AVG	P	6h-STDEV		6h	2d	7d				6h	2d	7d
	M	0	11.6449	40.7972	17.4807	17.159	0	23.4861	4.94863	9.47824	0.600237	10.109	Medaka macrophages	9.47824	15.6944	13.558			Zebrafish macrophages	17.4807	33.5632	56.5385
	N	138.873	40.7573	86.694	88.7748	40.0826	137.718	23.4861	27.2175	62.8071	0.609895	52.9917	Zebrafish macrophages	17.4807	33.5632	56.5385			Zebrafish neutrophils	88.7748	129.226	50.861
																			Zebrafish M-rest	12.4731	12.1882	4.36222
	M	1.2953	24.8198	11.3043	12.4731	9.63933	13.4153	6.36511	11.6333	10.4712	0.793011	2.99324							Zebrafish N-rest	49.1264	54.8371	25.5158
	N	19.4295	82.7326	45.2172	49.1264	25.9908	21.241	9.54766	42.1707	24.3198	0.297072	13.495	Medaka neutrophils	62.8071	181.375	116.829			Medaka macrophages	9.47824	15.6944	13.558
													Zebrafish neutrophils	88.7748	129.226	50.861			Medaka neutrophils	62.8071	181.375	116.829
																			Medaka M-rest	10.4712	19.6174	13.588
		2d-1	2d-2	2d-3	2d-AVG	2d-STDEV	2d-1	2d-2	2d-3	2d-AVG	P	2d-STDEV							Medaka N-rest	24.3198	63.8794	45.5071
	M	46.962	28.2444	25.4831	33.5632	9.54121	28.1423	18.9408	0	15.6944	0.169752	11.7162
	N	207.415	56.4889	123.775	129.226	61.7359	194.438	210.454	139.234	181.375	0.3445	30.5071
	M	12.8808	7.41607	16.2677	12.1882	3.64669	16.5933	33.3804	8.87849	19.6174	0.388083	10.2289
	N	77.2846	29.6643	57.5625	54.8371	19.5362	55.5875	63.247	72.8036	63.8794	0.571356	7.04263
		7d-1	7d-2	7d-3	7d-AVG	7d-STDEV	7d-1	7d-2	7d-3	7d-AVG	P	7d-STDEV
	M	77.589	38.7047	53.3217	56.5385	16.0366	12.0149	8.64897	20.01	13.558	0.0220946	4.76473
	N	38.7945	65.3143	48.4743	50.861	10.9574	162.202	56.2183	132.066	116.829	0.11198	44.5889
	M	4.24679	1.42224	7.41765	4.36222	2.44898	7.66808	1.35669	31.7392	13.588	0.38272	13.0909
	N	19.1106	32.7114	24.7255	25.5158	5.58059	85.4443	13.5669	37.5099	45.5071	0.405021	29.8837
