# Supplementary material for: Reciprocal analyses in zebrafish and medaka reveal that harnessing the immune response promotes cardiac regeneration
Source: eLife. 2017 Jun 20;6:e25605. doi: 10.7554/eLife.25605 (PMC5498136; doi:10.7554/eLife.25605)
Supplement: Figure 4—figure supplement 1—source data 1. — DOI: http://dx.doi.org/10.7554/eLife.25605.013 [file elife-25605-fig4-figsupp1-data1.xlsx]

## Sheet: Figure 4-S1 immune cell
PBS		1d-1		1d-2		1d-3	1d-AVG	1d-STDEV		CL		1d-1		1d-2		1d-3	1d-AVG	1d-STDEV		PBS	1d-1	1d-2	1d-3	1d-AVG	1d-STDEV			CL	1d-1	1d-2	1d-3	1d-AVG	1d-STDEV	P
M	16	41.995	7	28.8678	11	75.8814	48.9147	19.8071		M	1	4.44237	3	12.8816	0	0	5.77464	5.34259			41.995	28.8678	75.8814	48.9147	19.8071				4.44237	12.8816	0	5.77464	5.34259	0.0409862
N	51	133.859	28	115.471	14	96.5764	115.302	15.221		N	26	115.502	37	158.873	10	60.0687	111.481	40.4366			133.859	115.471	96.5764	115.302	15.221				115.502	158.873	60.0687	111.481	40.4366	0.906501
injury site	0.380998		0.242485		0.144963					injury site	0.225105		0.232891		0.166476
PBS		7d-1		7d-2		7d-3	7d-AVG	7d-STDEV		CL		7d-1		7d-2		7d-3	7d-AVG	7d-STDEV		PBS	7d-1	7d-2	7d-3	7d-AVG	7d-STDEV			CL	7d-1	7d-2	7d-3	7d-AVG	7d-STDEV
M (old)	35	102.836	24	61.9016	13	81.5758	82.1044	16.7155		M	24	86.3272	126	492.166	55	135.223	237.906	180.894			102.836	61.9016	81.5758	82.1044	16.7155				86.3272	492.166	135.223	237.906	180.894	0.291908
N	21	61.7016	30	77.377	9	56.4755	65.1847	8.88134		N	106	381.279	111	433.575	110	270.446	361.767	68.0112			61.7016	77.377	56.4755	65.1847	8.88134				381.279	434.744	270.446	362.156	68.4235	0.00368297
injury site	0.340348		0.387712		0.159361					injury site	0.278012		0.256011		0.406735
PBS		7d-1		7d-2		7d-3		7d-4		7d-5		7d-6	7d-AVG	7d-STDEV		CL		7d-1		7d-2		7d-3		7d-4		7d-5		7d-6	7d-AVG	7d-STDEV
M (new)	35	102.836	24	61.9016	13	81.5758	37	139.928	56	233.541	36	117.05	122.805	55.3723		M	24	86.3272	126	492.166	55	135.223	40	148.88	61	203.89	53	198.499	210.831	131.913
injury site	0.340348		0.387712		0.159361		0.264422		0.239787		0.307562					injury site	0.225105		0.232891		0.166476		0.268673		0.299181		0.267004
M (new)	7d-1	7d-2	7d-3	7d-4	7d-5	7d-6	7d-AVG	7d-STDEV	P
PBS	102.836	61.9016	81.5758	139.928	233.541	117.05	122.805	55.3723	0.198901
CL	86.3272	492.166	135.223	148.88	203.89	198.499	210.831	131.913
								PBS-injected	CL-injected
							Macrophages	48.9147	5.77464	19.8071	5.34259
							Neutrophils	115.302	111.481	15.221	40.4366
								PBS-injected	CL-injected
							Macrophages	122.805	210.831	55.3723	131.913
							Neutrophils	65.1847	361.767	8.88134	68.0112
