# Supplementary material for: Reciprocal analyses in zebrafish and medaka reveal that harnessing the immune response promotes cardiac regeneration
Source: eLife. 2017 Jun 20;6:e25605. doi: 10.7554/eLife.25605 (PMC5498136; doi:10.7554/eLife.25605)
Supplement: Figure 4—source data 1. — DOI: http://dx.doi.org/10.7554/eLife.25605.010 [file elife-25605-fig4-data1.xlsx]

## Sheet: Figure 4 CL vs PBS CM
	% of proliferating CMs
	PBS injected	CL injected
	33.1	8.7
	30.2	7.7
	23.27	16.11
	25.3	18.36
	31.4
	30.4
Average	28.945	12.7175
SEM	2.24553	3.06707
	t-test
	0.000469125
