# Supplementary material for: Reciprocal analyses in zebrafish and medaka reveal that harnessing the immune response promotes cardiac regeneration
Source: eLife. 2017 Jun 20;6:e25605. doi: 10.7554/eLife.25605 (PMC5498136; doi:10.7554/eLife.25605)
Supplement: Figure 4—source data 2. — DOI: http://dx.doi.org/10.7554/eLife.25605.011 [file elife-25605-fig4-data2.xlsx]

## Sheet: Figure 4 Zebrafish scar resolu.
		Heart1	Heart2	Heart3	Heart4	Heart5	Heart6	Heart7	AVG	STDVE	P
PBS	injured area	70873	16989	72481	55957	74065	39319	68949	56947.6	7533.17	0.000813761
	total area	630454	636862	765912	1085111	1467341	1265306	1188575
	ratio	0.112416	0.0266761	0.0946336	0.051568	0.0504757	0.0310747	0.0580098			0.00594274
CL	injured area	281190	183873	196473	94211	197657	115677		178180	24896.9
	total area	999202	1010649	590617	754183	1537267	1224828
	ratio	0.281415	0.181936	0.332657	0.124918	0.128577	0.0944435
					PBS injected	56947.6	7533.17
					CL injected	178180	24896.9
