# Supplementary material for: Reciprocal analyses in zebrafish and medaka reveal that harnessing the immune response promotes cardiac regeneration
Source: eLife. 2017 Jun 20;6:e25605. doi: 10.7554/eLife.25605 (PMC5498136; doi:10.7554/eLife.25605)
Supplement: Figure 6—source data 1. — DOI: http://dx.doi.org/10.7554/eLife.25605.017 [file elife-25605-fig6-data1.xlsx]

## Sheet: Figure 6 poly IC vs PBS
	Medaka PBS		7d-1		7d-2		7d-3	7d-AVG	7d-STDEV					P
	M	4	12.0149	4	8.64897	5	20.01	13.558	4.76473	M	12.0149	8.64897	20.01	0.043058
	N	54	162.202	26	56.2183	33	132.066	116.829	44.5889	N	162.202	56.2183	132.066	0.114268
	injury area	0.332919		0.462483		0.249875
	Medaka Poly I:C		7d-1		7d-2		7d-3	7d-AVG	7d-STDEV
	M	19	133.887	23	42.9981	22	97.2961	91.3936	37.3391	M	133.887	42.9981	97.2961
	N	9	63.42	24	44.8676	11	48.648	52.3119	8.00483	N	63.42	44.8676	48.648
	injury area	0.141911		0.534907		0.226114
		PBS-injected	Poly I:C-injected
	Macrophages	13.558	116.829	4.76473	37.3391
	Neutrophils	91.3936	52.3119	44.5889	8.00483
