# Supplementary material for: Reciprocal analyses in zebrafish and medaka reveal that harnessing the immune response promotes cardiac regeneration
Source: eLife. 2017 Jun 20;6:e25605. doi: 10.7554/eLife.25605 (PMC5498136; doi:10.7554/eLife.25605)
Supplement: Figure 8—source data 1. — DOI: http://dx.doi.org/10.7554/eLife.25605.020 [file elife-25605-fig8-data1.xlsx]

## Sheet: Figure 8 Poly IC vs PBS CM
	% of proliferating CMs
	PBS	Poly I:C	CL + Poly I:C
	3.75	11.72	0.65
	6.01	12.95	2.17
	1.73	13.82	0.76
	1.83	11.43
		18.64
Average	3.33	13.712	1.19333
SEM	1.00701	1.30486	0.489365
	t-test
	0.000530073	0.000407979	0.150669
