# Supplementary material for: Reciprocal analyses in zebrafish and medaka reveal that harnessing the immune response promotes cardiac regeneration
Source: eLife. 2017 Jun 20;6:e25605. doi: 10.7554/eLife.25605 (PMC5498136; doi:10.7554/eLife.25605)
Supplement: Figure 9—source data 1. — DOI: http://dx.doi.org/10.7554/eLife.25605.022 [file elife-25605-fig9-data1.xlsx]

## Sheet: Figure 9 Medaka scar resolution
		Heart1	Heart2	Heart3	Heart4	Heart5			P
PBS	Injured area	210921	244303	291412	61924	307328	223178	43781.5	0.027465
	total area	1472964	1441556	1805869	1266638	1629331
	ratio	0.143195	0.169472	0.161369	0.0488885	0.188622	0.142309	0.0244686	0.027447
Poly I:C	Injured area	70845	146587	39354	23862		70162	27285.6
	total area	2250620	1395585	913232	591063
	ratio	0.031478	0.105036	0.0430931	0.0403713		0.0549947	0.0168639
			PBS-injected	223178	43781.5
			Poly I:C-injected	70162	27285.6
