# Supplementary material for: Reciprocal analyses in zebrafish and medaka reveal that harnessing the immune response promotes cardiac regeneration
Source: eLife. 2017 Jun 20;6:e25605. doi: 10.7554/eLife.25605 (PMC5498136; doi:10.7554/eLife.25605)
Supplement: Supplementary file 4. — DOI: http://dx.doi.org/10.7554/eLife.25605.026 [file elife-25605-supp4.xlsx]

## Sheet: CP_vs_0
Canonical Pathway	Z-6H	Z-1D	Z-2D	Z-3D	Z-5D		M-6H	M-2D	M-3D	M-6D
1,25-dihydroxyvitamin D3 Biosynthesis							0	0	0
14-3-3-mediated Signaling
1D-myo-inositol Hexakisphosphate Biosynthesis V (from Ins(1,3,4)P3)				0	0			0	0
2-amino-3-carboxymuconate Semialdehyde Degradation to Glutaryl-CoA	0	0		0	0		0	0	0	0
2-ketoglutarate Dehydrogenase Complex	0			0	0		0	0	0	0
2-oxobutanoate Degradation I	0			0			0			0
3-phosphoinositide Biosynthesis
3-phosphoinositide Degradation
4-1BB Signaling in T Lymphocytes	1	0	0.904534	0.377964			0.816497		1	1.1
4-aminobutyrate Degradation I				0	0			0	0
4-hydroxybenzoate Biosynthesis		0			0		0	0	0
4-hydroxyphenylpyruvate Biosynthesis		0			0		0	0	0
4-hydroxyproline Degradation I				0				0	0
5-aminoimidazole Ribonucleotide Biosynthesis I	0		0	0	0			0		0
Acetate Conversion to Acetyl-CoA				0	0				0
Acetyl-CoA Biosynthesis I (Pyruvate Dehydrogenase Complex)	0			0	0		0	0	0	0
Actin Cytoskeleton Signaling
Actin Nucleation by ARP-WASP Complex	3.44124	2.04124	3.29983	3.5	2.88675		2.12132	2.52982	2.67261	3.44124
Acute Myeloid Leukemia Signaling	-0.5	0.942809	0.654654	-1.13389	0.447214		0.377964	-2	-1	-0.6
Acute Phase Response Signaling	2.11695	1.58114	1.66667	1.2792	1.78885		2.71069	1.50756	2.50185	2.11695
Acyl Carrier Protein Metabolism		0	0	0	0			0	0
Acyl-CoA Hydrolysis								0	0
Adenine and Adenosine Salvage I	0						0	0	0	0
Adipogenesis pathway
Agranulocyte Adhesion and Diapedesis
Agrin Interactions at Neuromuscular Junction	3.27327	0.557086	1.73205	1.29099	1.66667		1.26491	1.41421	0.727607	3.27327
Airway Pathology in Chronic Obstructive Pulmonary Disease
Alanine Biosynthesis II	0	0	0	0			0	0	0	0
Alanine Biosynthesis III	0	0	0	0	0		0	0	0	0
Alanine Degradation III	0	0	0	0			0	0	0	0
All-trans-decaprenyl Diphosphate Biosynthesis		0	0	0	0		0	0	0
AMPK Signaling	0.169031	-1.58114	-1.37249	-0.6	-1.4596		-0.534522	-1.14708	-1.63299	0.169031
Amyloid Processing	0.816497	0.333333	0.333333	1.13389	1.63299		1			0.816497
Amyotrophic Lateral Sclerosis Signaling
Androgen Signaling	0.301511	0.534522	0.942809	0.377964	1.41421		1	-1.41421	-0.632456	0.301511
Angiopoietin Signaling	1.73205	1.41421	1	0.377964	0.377964		0.816497	1	0	1.73205
Antioxidant Action of Vitamin C	-0.258199	-1.34164	-3.1305	-2	-3.05085		-2.11058	-2.82843	-2.11058	-0.258199
Antiproliferative Role of Somatostatin Receptor 2	0.534522	1.5	1.29099	0	1		0.447214	0.447214	1	0.534522
Antiproliferative Role of TOB in T Cell Signaling							0
Apoptosis Signaling	0.471405	-0.19245	-0.365148	0.447214	0.83205		0.333333	-1.13389	-2.11058	0.471405
April Mediated Signaling	1	0	1.38675	0	1.13389		1.63299		1.63299	1.1
Arginine Degradation I (Arginase Pathway)								0
Arginine Degradation VI (Arginase 2 Pathway)		0	0					0
Arsenate Detoxification I (Glutaredoxin)					0			0
Aryl Hydrocarbon Receptor Signaling	-0.377964	-0.333333	-0.377964	-0.816497	-0.816497		1		-0.816497	-0.377964
Ascorbate Recycling (Cytosolic)	0				0			0		0
Asparagine Biosynthesis I	0			0	0		0			0
Asparagine Degradation I		0	0	0	0		0	0	0
Aspartate Biosynthesis	0			0	0		0		0	0
Aspartate Degradation II				0	0		0
Assembly of RNA Polymerase I Complex				0	0
Assembly of RNA Polymerase III Complex				0	0		0	0	0
ATM Signaling	-2.11058	0.229416	1.21268	0.774597	1.06904		0.816497	1.26491	1.38675	-2.11058
autophagy							0	0	0
Axonal Guidance Signaling
B Cell Activating Factor Signaling	0.707107	0.534522	1.94145	0.632456	2		1.63299	2	1.63299	0.707107
B Cell Development							0
B Cell Receptor Signaling
Basal Cell Carcinoma Signaling
BER pathway
Bile Acid Biosynthesis, Neutral Pathway									0
Biotin-carboxyl Carrier Protein Assembly	0						0			0
Bladder Cancer Signaling
BMP signaling pathway
Branched-chain α-keto acid Dehydrogenase Complex	0			0	0					0
Breast Cancer Regulation by Stathmin1
Calcium Signaling	0.654654	-0.377964	1.76777	0.426401	1.41421		0.774597	0.5	1.21268	0.654654
Calcium Transport I
cAMP-mediated signaling	2.1009	-0.762001	2.32122	0.308607	0.308607		0.507093	0.353553	0	2.1009
Cardiac Hypertrophy Signaling	2.32379	-0.688247	1.17851	0.294884	1.02899		0.557086	0.426401	0.928477	2.32379
Cardiac β-adrenergic Signaling	-0.2	-1.97566	-0.365148	-1.5	-1.60591		0.301511	-1.50756	-0.774597	-0.3
Cardiolipin Biosynthesis II	0	0	0	0			0	0	0	0
Cardiomyocyte Differentiation via BMP Receptors
Caveolar-mediated Endocytosis Signaling
CCR3 Signaling in Eosinophils
CCR5 Signaling in Macrophages
CD27 Signaling in Lymphocytes
CD28 Signaling in T Helper Cells	1.56893	2	3.4125	3	4.14614		1.73205	0.904534	0.688247	1.56893
CD40 Signaling	0.242536	0.426401	0.654654	-0.258199	1.26491		1		0.377964	0.242536
CDK5 Signaling	-1	0.333333	-0.522233	-0.426401	-0.942809		-1.69775	-0.258199	0	-1.1
CDP-diacylglycerol Biosynthesis I					0
Cell Cycle Control of Chromosomal Replication
Cell Cycle Regulation by BTG Family Proteins
Cell Cycle: G1/S Checkpoint Regulation	-0.27735	-1.96396	-1	-1.06904	-1.94145		1.13389	0	0	-0.27735
Cell Cycle: G2/M DNA Damage Checkpoint Regulation	1.06904	-1.69775	-1.88562	-1.29099	-1.94145		0	-2.33333	-2.33333	1.06904
Cellular Effects of Sildenafil (Viagra)
Ceramide Biosynthesis	0						0	0	0	0
Ceramide Degradation							0
Ceramide Signaling	2.06474	1.70561	1.2792	0	0.707107		-0.447214	0.447214	1.1547	2.06474
Chemokine Signaling	1.06904	2.04124	2.29366	1.5	2.7136		1.13389	1.66667	2.67261	1.06904
Cholecystokinin/Gastrin-mediated Signaling	3.15682	1.66667	2.95932	1.4596	3.35659		1.73205	0.83205	1.60591	3.15682
Choline Degradation I	0	0		0	0		0	0	0	0
Chondroitin and Dermatan Biosynthesis		0			0
Chondroitin Sulfate Biosynthesis
Chondroitin Sulfate Biosynthesis (Late Stages)
Chondroitin Sulfate Degradation (Metazoa)
Chronic Myeloid Leukemia Signaling
Circadian Rhythm Signaling
Citrulline Degradation	0		0	0	0					0
Citrulline-Nitric Oxide Cycle							0	0	0
Clathrin-mediated Endocytosis Signaling
Cleavage and Polyadenylation of Pre-mRNA	0			0	0		0			0
CMP-N-acetylneuraminate Biosynthesis I (Eukaryotes)				0	0		0	0	0
CNTF Signaling	1.38675	1.5	1.29099	0			1.13389		0.447214	1.38675
Coagulation System	0.377964	0	1.38675	0.377964	0		0.27735	-0.816497	-0.534522	0.377964
Coenzyme A Biosynthesis					0			0	0
Colorectal Cancer Metastasis Signaling	2.12132	0.232495	1.88562	1.63978	4.6291		2.11058	2.53546	2.23607	2.12132
Complement System	-2.23607	-0.377964	0	0	1.34164		1		1	-2.23607
Corticotropin Releasing Hormone Signaling
Creatine-phosphate Biosynthesis	0									0
CREB Signaling in Neurons	-1.85934	0	0.632456	1.04257	0.852803		-0.5	-0.83205	-0.654654	-1.85934
CXCR4 Signaling	2.28748	2.2188	2.71429	2.55604	4.08248		2.13201	1.88562	1.82574	2.28748
Cyclins and Cell Cycle Regulation	0	1.34164	1.87663	1.60591	1.69775			1.41421	1.50756	0.1
Cysteine Biosynthesis/Homocysteine Degradation								0	0
Death Receptor Signaling	0.852803	1.29987	1.41421	0.942809	1.73205		1.89737	-1	0.377964	0.852803
Dermatan Sulfate Biosynthesis
Dermatan Sulfate Biosynthesis (Late Stages)
Dermatan Sulfate Degradation (Metazoa)
D-glucuronate Degradation I	0		0	0	0			0	0	0
Diphthamide Biosynthesis		0		0	0			0	0
D-mannose Degradation	0	0		0	0		0	0	0	0
D-myo-inositol (1,4,5,6)-Tetrakisphosphate Biosynthesis
D-myo-inositol (3,4,5,6)-tetrakisphosphate Biosynthesis
D-myo-inositol-5-phosphate Metabolism
DNA damage-induced 14-3-3σ Signaling
DNA Double-Strand Break Repair by Homologous Recombination
DNA Double-Strand Break Repair by Non-Homologous End Joining					0
DNA Methylation and Transcriptional Repression Signaling
Dolichol and Dolichyl Phosphate Biosynthesis					0		0	0	0
Dopamine Receptor Signaling	-1.94145	-1.1547	0.258199	-0.707107	-0.333333		-1.41421	-1.34164	-0.632456	-1.94145
Dopamine-DARPP32 Feedback in cAMP Signaling	-1.06066	0.342997	0.800641	0.784465	0.654654		-0.727607	-1.5	-0.229416	-1.06066
dTMP De Novo Biosynthesis							0
EGF Signaling	2	0.774597	2	0.632456	1.88982		1.13389	0	0.632456	2.1
Eicosanoid Signaling	-0.707107	1.34164	1.26491	1.13389	1.13389		2.23607		1	-0.707107
Embryonic Stem Cell Differentiation into Cardiac Lineages	0				0		0	0	0	0
Endometrial Cancer Signaling
Endoplasmic Reticulum Stress Pathway							0
Endothelin-1 Signaling	0.729325	3.22064	2.94059	2.53546	4.01663		2.98481	2.29366	2.69408	0.729325
eNOS Signaling	-1.37199	-0.707107	0.324443	0.392232	1.09109		0.727607	-0.258199	-0.654654	-1.37199
Ephrin A Signaling
Ephrin B Signaling	1	-0.471405	0.5	-1.50756	0		0	1	0.333333	1.1
Ephrin Receptor Signaling
Epithelial Adherens Junction Signaling
ErbB Signaling
ErbB2-ErbB3 Signaling	2	1	2							2.1
ErbB4 Signaling	0.258199	2.35702	2.06474	1.66667	2.82843		1.34164	-0.447214	0.301511	0.258199
ERK/MAPK Signaling	1.90516	1.48324	2.40535	1.25724	1.04257		0.229416	-0.471405	0.538816	1.90516
ERK5 Signaling	3	2.84019	2.5	1.50756	1.66667		1.13389	1.34164	2.12132	3
Erythropoietin Signaling
Estrogen-Dependent Breast Cancer Signaling	1.88562	1.38675	1.94145	-0.447214	0		0		1	1.88562
Estrogen-mediated S-phase Entry	1.34164	1.73205	1.73205	2.11058	2.11058			1.63299	1.88982	1.34164
Ethanol Degradation IV
Eumelanin Biosynthesis	0									0
Extrinsic Prothrombin Activation Pathway		0	1.13389				1.34164		-0.447214
Factors Promoting Cardiogenesis in Vertebrates
FAK Signaling
Fatty Acid α-oxidation
Fatty Acid β-oxidation I
Fatty Acid β-oxidation III (Unsaturated, Odd Number)	0			0	0			0	0	0
Fc Epsilon RI Signaling	1.51186	2.95932	3.42997	2.4004	3.90007		0.904534	0.301511	0	1.51186
Fcγ Receptor-mediated Phagocytosis in Macrophages and Monocytes	3.53553	3.81246	3.79473	4.15761	4.79583		0	1.14708	1	3.53553
FcγRIIB Signaling in B Lymphocytes	1.38675	1.88562	2.32379	1.1547	2.33333			0.816497	0.904534	1.38675
FGF Signaling	1.56893	-1.22474	-0.408248	-1.38675	0.534522		-0.534522	-1.50756	-1.06904	1.56893
FLT3 Signaling in Hematopoietic Progenitor Cells
fMLP Signaling in Neutrophils	1.29987	2.46598	3.12358	2.71069	3.44124		2.3094	1.1547	2.35702	1.29987
Formaldehyde Oxidation II (Glutathione-dependent)		0		0	0
FXR/RXR Activation
G Beta Gamma Signaling
GABA Receptor Signaling
GADD45 Signaling
Gap Junction Signaling
GDNF Family Ligand-Receptor Interactions	0.447214	1.22474	1.04257	-0.774597	1		1.34164	1	0.27735	0.447214
GDP-L-fucose Biosynthesis I (from GDP-D-mannose)	0			0			0	0		0
GDP-L-fucose Biosynthesis II (from L-fucose)				0	0			0	0
GDP-mannose Biosynthesis							0	0	0
Germ Cell-Sertoli Cell Junction Signaling
Glioblastoma Multiforme Signaling	1.98248	1.37249	2.16025	1.8	3.53009		1.52753	0.727607	0.852803	1.98248
Glioma Invasiveness Signaling	1.87663	1.1767	2.35702	2	3.16228		2.11058	2.33333	2.66789	1.87663
Glioma Signaling	0.377964	1.82574	2.92119	1.14708	3.1305		1.88982	0.333333	1.06904	0.377964
Glucocorticoid Receptor Signaling
Gluconeogenesis I
Glutamate Biosynthesis II	0	0	0		0		0	0	0	0
Glutamate Degradation II	0			0	0		0		0	0
Glutamate Degradation III (via 4-aminobutyrate)				0	0			0	0
Glutamate Degradation X	0	0	0		0		0	0	0	0
Glutamate Dependent Acid Resistance	0		0	0	0		0	0	0	0
Glutamate Removal from Folates		0	0	0	0		0	0	0
Glutathione Biosynthesis	0			0	0			0		0
Glutathione Redox Reactions I								0
Glutathione Redox Reactions II					0			0
Glutathione-mediated Detoxification								0
Glycerol Degradation I								0
Glycerol-3-phosphate Shuttle								0
Glycine Betaine Degradation
Glycine Biosynthesis I	0						0	0	0	0
Glycine Cleavage Complex				0	0
Glycogen Biosynthesis II (from UDP-D-Glucose)
Glycolysis I
GM-CSF Signaling	0.5	1.80739	1.38675	0	1.13389		0.816497		0.377964	0.5
GNRH Signaling	1.52128	1.71791	2.4797	1.73205	1.87663		0.942809	0.258199	1.4596	1.52128
GPCR-Mediated Integration of Enteroendocrine Signaling Exemplified by an L Cell
GPCR-Mediated Nutrient Sensing in Enteroendocrine Cells
G-Protein Coupled Receptor Signaling
Granulocyte Adhesion and Diapedesis
Growth Hormone Signaling	-0.408248	0.408248	0.6	0.688247	0.942809		2.11058	0	0.774597	-0.408248
Guanine and Guanosine Salvage I		0	0	0	0		0	0	0
Gα12/13 Signaling	1.5667	0.507093	1.17954	0.852803	2.3094		1.88562	0.333333	1.34164	1.5667
Gαi Signaling	2.2	1	2.26301	1.70561	1.09109		1	0.5	0.242536	2.3
Gαq Signaling	0.800641	0.866025	2.77143	2.04265	2.74563		1.70561	1.14708	1.34715	0.800641
Gαs Signaling	0.730297	-1.29987	0.557086	0	0.774597		0	-0.534522	-0.229416	0.730297
Hematopoiesis from Multipotent Stem Cells	0			0	0					0
Heme Biosynthesis from Uroporphyrinogen-III I					0		0
Heme Degradation
Heparan Sulfate Biosynthesis
Heparan Sulfate Biosynthesis (Late Stages)
Hepatic Cholestasis
Hepatic Fibrosis / Hepatic Stellate Cell Activation
HER-2 Signaling in Breast Cancer
Hereditary Breast Cancer Signaling
HGF Signaling	2.61116	2.12132	2.79478	1.70561	2.66789		2.52982	0.301511	0.894427	2.61116
HIF1α Signaling
HIPPO signaling	-3	-1.1547	-2.06474	0	0			0	0.707107	-3.1
Histamine Biosynthesis		0		0	0		0	0	0
Histidine Degradation III
Histidine Degradation VI
HMGB1 Signaling	2.19089	0.973329	2.2	0.942809	1.73205		1.41421	1.26491	0.654654	2.19089
Human Embryonic Stem Cell Pluripotency
Huntington's Disease Signaling
Hypusine Biosynthesis							0	0	0
IGF-1 Signaling	0	0	0.208514	-0.83205	0.301511		0	-1.41421	-1.06904	0
IL-1 Signaling	0.654654	0.185695	2.2	1.41421	1.73205		1.38675	1	0.57735	0.654654
IL-10 Signaling
IL-12 Signaling and Production in Macrophages
IL-15 Signaling
IL-17 Signaling
IL-17A Signaling in Airway Cells
IL-17A Signaling in Fibroblasts
IL-17A Signaling in Gastric Cells
IL-2 Signaling	1.06904	2.18282	1.60357	0.707107	1.63299				0.707107	1.06904
IL-22 Signaling	1.88982	0.57735	1.88982	-0.816497			1.13389		-0.447214	1.88982
IL-3 Signaling	0	0.707107	1.66667	1.34164	2.23607				0.447214	0
IL-4 Signaling
IL-6 Signaling	1.96116	1.21854	1.29987	0.218218	1.5		1.29099	0.707107	1.21268	1.96116
IL-8 Signaling	3.26599	2.6295	3.54291	3.50747	4.76757		2.92119	3.13786	3.50747	3.26599
IL-9 Signaling	0	0.301511	0.57735	-0.377964	0		1.34164		-1	0.1
ILK Signaling	2.17732	-0.239046	1.5	1.02105	2.46598		2.50185	1.87663	2.1974	2.17732
Induction of Apoptosis by HIV1	1.29099	0.654654	1.14708	0.301511	0.632456		1.63299	-1	-0.447214	1.29099
Inhibition of Angiogenesis by TSP1	1.34164	-1.1547	0	-1.13389	0		0.377964	1	0.377964	1.34164
Inhibition of Matrix Metalloproteases
iNOS Signaling		1	2
Inosine-5'-phosphate Biosynthesis II					0			0	0
Insulin Receptor Signaling
Integrin Signaling	3.09839	1.34164	2.32495	2.65396	3.08697		0.852803	1.34715	1.71791	3.09839
Interferon Signaling	0	0.707107	1.88982				1	0	0	0.1
Intrinsic Prothrombin Activation Pathway
Isoleucine Degradation I
JAK/Stat Signaling	-0.816497	1.22474	0.625543	0	0		0.301511	-1	-0.333333	-0.816497
Lactose Degradation III			0		0		0	0	0
Lanosterol Biosynthesis			0	0	0		0	0	0
L-cysteine Degradation I	0			0	0		0		0	0
L-cysteine Degradation II								0	0
L-cysteine Degradation III	0			0	0		0	0	0	0
L-dopachrome Biosynthesis	0	0	0	0	0		0			0
Leptin Signaling in Obesity
Leucine Degradation I	0				0					0
Leukocyte Extravasation Signaling	2.7735	2.39377	3.35659	2.94884	4.43877		1.82574	1.97566	2.41209	2.7735
L-glutamine Biosynthesis II (tRNA-dependent)		0		0	0		0	0	0
Lipid Antigen Presentation by CD1							0
Lipoate Biosynthesis and Incorporation II	0	0		0	0		0	0	0	0
Lipoate Salvage and Modification	0	0		0	0		0	0	0	0
LPS/IL-1 Mediated Inhibition of RXR Function	0.258199	-0.27735	-0.534522	-0.57735	0.816497		0	0.816497	0	0.258199
LPS-stimulated MAPK Signaling	1.96396	2.55604	2.88675	1.88562	3.05085		1.89737	0	1.29099	1.96396
L-serine Degradation								0	0
LXR/RXR Activation	-0.218218	-1.2792	-1.70561	0	-1.38675		-0.229416	-0.333333	0.229416	-0.218218
Lysine Degradation II								0	0
Lysine Degradation V								0	0
Macropinocytosis Signaling	1.78885	3.29983	3.27327	2.52982	3.31662		2	0.333333	1.5	1.78885
Maturity Onset Diabetes of Young (MODY) Signaling
Mechanisms of Viral Exit from Host Cells
Melanocyte Development and Pigmentation Signaling	-0.426401	-0.2	0.6	-0.904534	-1		-0.632456	-1	-0.83205	-0.426401
Melanoma Signaling
Melatonin Degradation II								0
Melatonin Signaling	-0.727607	1.41421	1.52753	2.52982	2.52982		0.377964	-0.377964	0.333333	-0.727607
Methionine Salvage II (Mammalian)	0	0	0	0	0					0
Methylglyoxal Degradation I	0		0	0	0		0	0	0	0
Methylglyoxal Degradation VI	0	0		0	0		0	0	0	0
Methylmalonyl Pathway	0			0			0			0
Methylthiopropionate Biosynthesis	0	0	0	0	0			0	0	0
MIF Regulation of Innate Immunity	1	1.1547	2.67261	1.38675	3		2		0.816497	1.1
Mismatch Repair in Eukaryotes							0
Mitochondrial Dysfunction
Mitotic Roles of Polo-Like Kinase
Molecular Mechanisms of Cancer
Molybdenum Cofactor Biosynthesis			0	0	0		0	0	0
Mouse Embryonic Stem Cell Pluripotency	2.35339	2.50185	1.34715	1.06904	3.4641		1	0.333333	0.258199	2.35339
MSP-RON Signaling Pathway
mTOR Signaling	1.58114	1.98248	2.83235	2.26779	2.98481		1.60357	1	1.1767	1.58114
Myc Mediated Apoptosis Signaling
Myo-inositol Biosynthesis							0	0	0
N-acetylglucosamine Degradation I							0	0	0
N-acetylglucosamine Degradation II							0	0	0
NAD Biosynthesis from 2-amino-3-carboxymuconate Semialdehyde			0
NAD Biosynthesis III							0	0
NAD Salvage Pathway II
NAD Salvage Pathway III		0		0			0	0
NADH Repair	0			0	0					0
Natural Killer Cell Signaling
Netrin Signaling
Neuregulin Signaling	1.29099	2.29366	2.6	2.52982	3.31662		0	0.377964	0.534522	1.29099
Neuropathic Pain Signaling In Dorsal Horn Neurons	-0.538816	0.784465	1.18322	0.852803	1.96396		1.1547	-0.242536	0	-0.538816
Neurotrophin/TRK Signaling	1.21268	1.88562	1.60591	0.707107	1		-0.447214		0	1.21268
NF-κB Activation by Viruses	1.4596	2.44949	2.64575	2.35702	2.84019		2.12132	0	1.41421	1.4596
NF-κB Signaling	1.85164	1.13137	1.94145	0.821995	2.69408		1.69775	0	0.208514	1.85164
NGF Signaling	1.8	2.55604	2.47487	0.942809	0.632456		1.94145	0.333333	0.727607	1.9
Nitric Oxide Signaling in the Cardiovascular System	0.392232	0	0.707107	0.625543	0.894427		0.27735	-0.534522	0	0.392232
nNOS Signaling in Neurons	-1.34164	-2.44949	0.333333	-0.447214	0.447214					-1.34164
Non-Small Cell Lung Cancer Signaling	0.301511	0.83205	1.73205	0				-1.34164	-0.333333	0.301511
Notch Signaling	1.63299	1.13389	2	2						1.63299
NRF2-mediated Oxidative Stress Response	1.80739	3.15682	3	1.06904	2.11058		1.89737	-0.377964	1.29099	1.80739
Oncostatin M Signaling	2.64575	2.7136	2.33333				1.34164			2.64575
Ovarian Cancer Signaling
Oxidative Phosphorylation
Oxidized GTP and dGTP Detoxification
P2Y Purigenic Receptor Signaling Pathway	-0.179605	1.33333	0.666667	1.09109	1.69775		0.258199	-0.904534	0.218218	-0.179605
p38 MAPK Signaling	3.54475	1.34715	2.11695	1	0.774597		1.1547	1.88982	1.88982	3.54475
p53 Signaling	0	0	1.88562	0.301511	-0.333333		0.377964		0	0
p70S6K Signaling	0.898027	3.33333	3.47851	3.12772	3.29983		2.88675	0.83205	1.70561	0.898027
PAK Signaling	1.1767	0.707107	1.56893	0.774597	2.11058		1.73205	0.632456	1	1.1767
Pancreatic Adenocarcinoma Signaling	2.50185	1.06066	2.82843	1.09109	2.66789		2.32379	2.52982	0.774597	2.50185
Parkinson's Signaling
Pathogenesis of Multiple Sclerosis	0						0	0		0
Paxillin Signaling	2.35339	0	0.898027	0	0.707107		1.1547	0	-0.471405	2.35339
PCP pathway	3.1305	-1.21268	0.426401	-0.301511	2.33333		-0.301511	0.333333	-0.57735	3.1305
PDGF Signaling	1.14708	1.96116	1.8	1	2.49615		1.89737	1	1.60357	1.14708
PEDF Signaling	-1.41421	0	0						-0.447214	-1.41421
Pentose Phosphate Pathway								0
Pentose Phosphate Pathway (Non-oxidative Branch)					0			0
Pentose Phosphate Pathway (Oxidative Branch)								0
phagosome formation
phagosome maturation
Phenylalanine Degradation I (Aerobic)			0	0	0
Phenylethylamine Degradation I				0	0		0	0	0
Phosphatidylcholine Biosynthesis I			0	0	0			0	0
Phosphatidylethanolamine Biosynthesis II				0	0
Phospholipase C Signaling	2.2188	1.83829	3.74166	3.42997	4.74693		2.41404	2.71069	2.95932	2.2188
PI3K Signaling in B Lymphocytes
PI3K/AKT Signaling	3	2.79478	3.54965	2.23607	1.69775		1.1547	-0.904534	0.471405	3
PKCθ Signaling in T Lymphocytes
Polyamine Regulation in Colon Cancer
PPAR Signaling	-1.09109	-2.11695	-1.4596	-1.29099	-2.3094		0	-0.377964	-1.60357	-1.09109
PPARα/RXRα Activation	-0.169031	0.294884	-0.729325	0.928477	0.816497		-0.447214	-1.50756	-0.625543	-0.169031
Pregnenolone Biosynthesis								0	0
Primary Immunodeficiency Signaling
Production of Nitric Oxide and Reactive Oxygen Species in Macrophages	2.54558	2.62613	4.55661	2.9673	4.45896		2.55604	1.04257	2	2.54558
Prolactin Signaling	-0.426401	1.8	0.408248	1.06904	1.80739		1.41421	-0.377964	0.83205	-0.426401
Proline Biosynthesis II (from Arginine)	0		0	0						0
Proline Degradation	0			0				0	0	0
Prostanoid Biosynthesis
Prostate Cancer Signaling
Protein Citrullination	0	0	0	0	0		0		0	0
Protein Kinase A Signaling
Protein Ubiquitination Pathway
PRPP Biosynthesis I	0		0	0	0		0	0	0	0
PTEN Signaling	-2.95932	0.160128	-1.37199	0.688247	0.774597		-0.27735	1.94145	1.60591	-2.95932
Purine Nucleotides De Novo Biosynthesis II								0
Putrescine Biosynthesis III								0
Pyridoxal 5'-phosphate Salvage Pathway
Pyrimidine Deoxyribonucleotides De Novo Biosynthesis I
Pyrimidine Ribonucleotides De Novo Biosynthesis
Pyrimidine Ribonucleotides Interconversion
Pyruvate Fermentation to Lactate				0
Rac Signaling	2.74563	1.76777	3.08697	1.70561	2.66789		1.73205	1.1547	1.41421	2.74563
RAN Signaling							0
RANK Signaling in Osteoclasts
Rapoport-Luebering Glycolytic Shunt				0
RAR Activation
Reelin Signaling in Neurons
Regulation of Actin-based Motility by Rho	3.27165	1	1.97566	3.26599	3.44124		1.29099	2	1.70561	3.27165
Regulation of Cellular Mechanics by Calpain Protease	1.38675	1	1.21268	0.83205	0.904534			-0.816497	0.707107	1.38675
Regulation of eIF4 and p70S6K Signaling	0.242536	0.471405	0.942809	0	-0.447214			-1.63299	-0.904534	0.242536
Regulation of IL-2 Expression in Activated and Anergic T Lymphocytes
Regulation of the Epithelial-Mesenchymal Transition Pathway
Relaxin Signaling	-1.56893	-1.73205	-0.377964	-0.894427	0.27735		0	-1.66667	-1.38675	-1.56893
Remodeling of Epithelial Adherens Junctions	3.4641	3.31662	3.60555	2.82843	2.82843			1.34164	1.63299	3.4641
Renal Cell Carcinoma Signaling	1.5	2	1	1.13389	1.88982		1		0.301511	1.6
Renin-Angiotensin Signaling	1.1767	2.53546	2.40098	2.06474	3.35659		1.38675	0.27735	0.894427	1.1767
Retinoate Biosynthesis I
RhoA Signaling	1.34715	0.160128	0.437595	1.34715	2.35702		0.534522	0	0.727607	1.34715
RhoGDI Signaling
Role of BRCA1 in DNA Damage Response	-0.471405	2.23607	1.41421	1.21268	1.60357		0	2.33333	2.33333	-0.471405
Role of CHK Proteins in Cell Cycle Checkpoint Control	-1.73205	-0.27735	-1	-0.904534	-0.632456			-0.377964	-0.707107	-1.73205
Role of IL-17A in Arthritis
Role of IL-17A in Psoriasis	0						0	0	0	0
Role of IL-17F in Allergic Inflammatory Airway Diseases
Role of JAK family kinases in IL-6-type Cytokine Signaling
Role of JAK1 and JAK3 in γc Cytokine Signaling
Role of JAK1, JAK2 and TYK2 in Interferon Signaling	-0.447214		-1							-0.447214
Role of JAK2 in Hormone-like Cytokine Signaling
Role of Lipids/Lipid Rafts in the Pathogenesis of Influenza		0	0	0	0		0	0	0
Role of Macrophages, Fibroblasts and Endothelial Cells in Rheumatoid Arthritis
Role of NANOG in Mammalian Embryonic Stem Cell Pluripotency	0.774597	2.13809	1.29099	1.13389	2		1.34164		-1.13389	0.774597
Role of NFAT in Cardiac Hypertrophy	0.437595	-0.525226	1.28571	-0.169031	1.56893		0.471405	-0.688247	0.2	0.437595
Role of NFAT in Regulation of the Immune Response	1.13389	2	3.18198	2.98481	4.24264		1.94145	2.11058	2.18282	1.13389
Role of Osteoblasts, Osteoclasts and Chondrocytes in Rheumatoid Arthritis
Role of p14/p19ARF in Tumor Suppression	0.333333	0	0.377964	1	0					0.333333
Role of Pattern Recognition Receptors in Recognition of Bacteria and Viruses	-0.218218	1.52753	2.85774	2.06474	4.3589		3.16228	1.26491	1.5	-0.218218
Role of RIG1-like Receptors in Antiviral Innate Immunity	1.34164	0.816497	1.88982	0				0		1.34164
Role of Tissue Factor in Cancer
S-adenosyl-L-methionine Biosynthesis	0	0	0				0			0
Salvage Pathways of Pyrimidine Deoxyribonucleotides		0		0	0
Salvage Pathways of Pyrimidine Ribonucleotides
SAPK/JNK Signaling	1.63299	1.29987	1.88982	-0.57735	0		0.707107	-0.447214	0	1.63299
Selenocysteine Biosynthesis II (Archaea and Eukaryotes)					0		0
Semaphorin Signaling in Neurons
Serine Biosynthesis	0							0		0
Serotonin and Melatonin Biosynthesis								0
Serotonin Receptor Signaling
Sertoli Cell-Sertoli Cell Junction Signaling
Signaling by Rho Family GTPases	2.47359	0.471405	1.93733	2.26274	4.22577		1.85934	1.82574	1.54303	2.47359
Small Cell Lung Cancer Signaling
S-methyl-5'-thioadenosine Degradation II	0		0	0	0		0	0	0	0
S-methyl-5-thio-α-D-ribose 1-phosphate Degradation				0	0		0	0	0
Sonic Hedgehog Signaling
Sorbitol Degradation I		0	0	0	0		0	0	0
Sperm Motility	0	2.04124	2.12132	2.52357	3.27327		1.26491	0	0.942809	0
Spermidine Biosynthesis I					0			0	0
Spermine and Spermidine Degradation I								0	0
Spermine Biosynthesis		0	0	0	0			0	0
Sphingomyelin Metabolism							0	0	0
Sphingosine-1-phosphate Signaling	0.707107	1.91485	2.50185	2.13201	3		2.3094	1.89737	1.38675	0.707107
STAT3 Pathway
Superoxide Radicals Degradation
Superpathway of Inositol Phosphate Compounds
Superpathway of Serine and Glycine Biosynthesis I	0							0		0
Synaptic Long Term Depression	0	1.29777	2.83235	2.64575	2.11695		1.69775	0.229416	1.22474	0
Synaptic Long Term Potentiation
T Cell Receptor Signaling
Taurine Biosynthesis			0	0			0	0	0
TCA Cycle II (Eukaryotic)				0	0
Tec Kinase Signaling	2.84605	1.89624	2.83235	3.02372	4.31455		3.26599	2.06474	1.51186	2.84605
Telomerase Signaling	0.688247	2.13201	1.70561	2.32379	2.33333		0	-0.816497	0.27735	0.688247
Telomere Extension by Telomerase							0
Tetrahydrobiopterin Biosynthesis I		0		0	0		0	0	0
Tetrahydrobiopterin Biosynthesis II		0		0	0		0	0	0
Tetrapyrrole Biosynthesis II								0
TGF-β Signaling	2.49615	0.784465	1.41421	0.27735	1.66667		0.904534	1.63299	2.11058	2.49615
The Visual Cycle
Thiamin Salvage III	0						0	0	0	0
Thioredoxin Pathway								0	0
Thiosulfate Disproportionation III (Rhodanese)	0			0	0		0	0	0	0
Threonine Degradation II	0	0	0	0	0				0	0
Thrombin Signaling	0.94388	1.95283	2.88874	2.46598	4.53557		2.92119	2.13201	2.69408	0.94388
Thrombopoietin Signaling	0.727607	2.68328	1.09109	1.1547	2.52982		1.63299	-0.447214	0.904534	0.727607
Thymine Degradation
Thyroid Cancer Signaling
Thyroid Hormone Biosynthesis	0						0	0	0	0
Tight Junction Signaling
TNFR1 Signaling	2.33333	0.942809	1.21268	1.50756	0.301511		2.23607		0.816497	2.33333
TNFR2 Signaling		1.13389	1.41421	1.63299	2			0
Toll-like Receptor Signaling	2.11058	0.83205	1.73205	1.73205	3.16228		0.707107		1.88982	2.11058
TR/RXR Activation
Trans, trans-farnesyl Diphosphate Biosynthesis	0			0	0		0	0	0	0
Triacylglycerol Biosynthesis
Triacylglycerol Degradation
Tryptophan Degradation to 2-amino-3-carboxymuconate Semialdehyde							0	0	0
Tumoricidal Function of Hepatic Natural Killer Cells		1.63299	1
TWEAK Signaling	0	0.301511	0.632456	-0.377964	-0.377964					0.1
Type I Diabetes Mellitus Signaling
Type II Diabetes Mellitus Signaling
Tyrosine Biosynthesis IV			0	0	0
Tyrosine Degradation I		0
UDP-N-acetyl-D-galactosamine Biosynthesis II
Unfolded protein response
Uracil Degradation II (Reductive)
Urea Cycle					0
Uridine-5'-phosphate Biosynthesis				0	0
UVA-Induced MAPK Signaling	-0.218218	1.4	1.70561	0.534522	2.12132		2.12132	0.816497	1.73205	-0.218218
UVB-Induced MAPK Signaling	1.21268	1.14708	1.69775	0.83205	2.52982		1	0	0.27735	1.21268
UVC-Induced MAPK Signaling	1.29099	2.4004	1.96396	0.57735	2.33333		0.816497	0.816497	1.73205	1.29099
Valine Degradation I
VDR/RXR Activation	1.63299	0.816497	1.63299	0.447214	0.816497					1.63299
VEGF Family Ligand-Receptor Interactions	0.688247	1.87663	2.04124	1.60357	2.13809		1.88982	0.707107	1	0.688247
VEGF Signaling	0.688247	-0.557086	-0.928477	-1.29099	-0.301511		-0.377964	0	-0.534522	0.688247
Virus Entry via Endocytic Pathways
Vitamin-C Transport
Wnt/β-catenin Signaling	-0.685994	1.56893	-0.557086	0.426401	1.22474		0	-1.60591	-2.18282	-0.685994
Xenobiotic Metabolism Signaling
Zymosterol Biosynthesis							0	0
α-Adrenergic Signaling	-0.218218	-0.377964	0.557086	0.774597	0.258199		0.301511	-0.27735	0.727607	-0.218218
α-tocopherol Degradation								0
β-alanine Degradation I				0
γ-glutamyl Cycle

## Sheet: CP_vs_sham
Canonical Pathway	Z-6H Sham	Z-1D Sham	Z-2D Sham	Z-3D Sham	Z-5D Sham		M-6H Sham	M-2D Sham	M-3D Sham	M-6D Sham
1,25-dihydroxyvitamin D3 Biosynthesis							0	0
14-3-3-mediated Signaling
1D-myo-inositol Hexakisphosphate Biosynthesis II (Mammalian)								0
1D-myo-inositol Hexakisphosphate Biosynthesis V (from Ins(1,3,4)P3)	0	0	0					0	0
2-amino-3-carboxymuconate Semialdehyde Degradation to Glutaryl-CoA	0	0		0	0			0	0	0
2-ketoglutarate Dehydrogenase Complex	0			0			0	0	0	0
2-oxobutanoate Degradation I	0			0			0	0	0	0
3-phosphoinositide Biosynthesis
3-phosphoinositide Degradation
4-1BB Signaling in T Lymphocytes		1.88982	1.13389		1.34164
4-aminobutyrate Degradation I	0	0	0	0	0		0	0	0
4-hydroxybenzoate Biosynthesis	0	0		0	0		0	0	0	0
4-hydroxyphenylpyruvate Biosynthesis	0	0		0	0		0	0	0	0
4-hydroxyproline Degradation I	0			0	0		0	0	0	0
5-aminoimidazole Ribonucleotide Biosynthesis I	0		0	0	0		0	0	0	0
Acetate Conversion to Acetyl-CoA	0			0				0	0	0
Acetyl-CoA Biosynthesis I (Pyruvate Dehydrogenase Complex)							0	0	0
Actin Cytoskeleton Signaling
Actin Nucleation by ARP-WASP Complex	1.63299	2	1.41421	2.5	3.4641		1.88982	0	2.44949	1.13389
Acute Myeloid Leukemia Signaling		1.66667	-1		1		0			0
Acute Phase Response Signaling	1	1.8	2.2	1.80739	1.67126		0	1.34164	2.49615	2.49615
Acyl-CoA Hydrolysis	0			0
Adenine and Adenosine Salvage I	0			0			0	0	0	0
Adenine and Adenosine Salvage III								0
Adenosine Nucleotides Degradation II								0
Adipogenesis pathway
Agranulocyte Adhesion and Diapedesis
Agrin Interactions at Neuromuscular Junction	2.32379	0	0	3.60555	2.49615		2.44949	0.816497	0.707107	2.12132
Airway Pathology in Chronic Obstructive Pulmonary Disease
Alanine Biosynthesis II	0	0	0	0			0	0	0	0
Alanine Biosynthesis III	0	0		0	0		0	0	0	0
Alanine Degradation III	0	0	0	0			0	0	0	0
Aldosterone Signaling in Epithelial Cells
Allograft Rejection Signaling								0
AMPK Signaling	0.333333	-0.174078	-1.41421	1.14708	-0.218218		1.41421	1	-0.632456	0.377964
Amyotrophic Lateral Sclerosis Signaling
Androgen Biosynthesis								0
Androgen Signaling	0	1.38675	0.904534	1.34164	2.52982
Antioxidant Action of Vitamin C	0.447214	-3.5	-2.83683	-3.05085	-3.15296		0		-1.13389	-1.63299
Antiproliferative Role of Somatostatin Receptor 2		1.13389	0.447214	0	1.88982		1.34164	0		0.447214
Antiproliferative Role of TOB in T Cell Signaling								0
Apoptosis Signaling	0.377964	-0.688247	0.218218	0.83205	0				-0.707107	-1.88982
April Mediated Signaling	1.34164	1.94145	0.904534	0.447214	2.12132					2.23607
Arginine Biosynthesis IV	0		0				0	0	0	0
Arginine Degradation I (Arginase Pathway)	0							0	0
Arginine Degradation VI (Arginase 2 Pathway)	0							0	0
Arsenate Detoxification I (Glutaredoxin)				0	0		0	0		0
Aryl Hydrocarbon Receptor Signaling	-1.34164	0.816497	-0.377964		0.816497
Ascorbate Recycling (Cytosolic)		0		0	0		0	0		0
Asparagine Biosynthesis I	0		0		0		0	0	0	0
Asparagine Degradation I	0		0	0	0		0	0	0	0
Aspartate Biosynthesis	0			0			0	0	0	0
Aspartate Degradation II	0			0			0		0	0
Assembly of RNA Polymerase I Complex	0		0	0	0		0	0	0	0
Assembly of RNA Polymerase II Complex				0			0	0		0
Assembly of RNA Polymerase III Complex	0		0		0		0	0	0	0
Atherosclerosis Signaling
ATM Signaling	1	1.60357	1.5	1.06904	1.94145				1.26491	0.816497
autophagy				0	0		0	0	0	0
Axonal Guidance Signaling
B Cell Activating Factor Signaling		2.7136	1.89737	2	2.44949					2.23607
B Cell Development	0						0
B Cell Receptor Signaling
Basal Cell Carcinoma Signaling
BER pathway							0	0	0	0
Bile Acid Biosynthesis, Neutral Pathway									0
Biotin-carboxyl Carrier Protein Assembly	0			0			0	0	0	0
Bladder Cancer Signaling
BMP signaling pathway
Branched-chain α-keto acid Dehydrogenase Complex	0			0			0	0	0	0
Breast Cancer Regulation by Stathmin1
Calcium Signaling	-2.3094	-0.654654	0	0.57735	2.13201		0.707107	-0.707107	0	0.904534
Calcium Transport I
cAMP-mediated signaling	0	0	0.384111	0.164399	3.50747		1.41421	0	-1.06066	2.04124
Cardiac Hypertrophy Signaling	0.894427	-0.137361	-1.69706	1.71499	4.11096		1.60357	0.904534	0.447214	3.44124
Cardiac β-adrenergic Signaling	-0.632456	-1.09109	-0.784465	0	1.94145				-0.816497
Catecholamine Biosynthesis		0		0	0
Caveolar-mediated Endocytosis Signaling
CCR5 Signaling in Macrophages
CD27 Signaling in Lymphocytes
CD28 Signaling in T Helper Cells	1.63299	3.65148	2.50185	3.29983	4.26401		1.13389	-1	0.904534	1.41421
CD40 Signaling	1.34164	1.88562	0.258199	0.816497	2.11058		1			1.63299
Cdc42 Signaling	1.38675	2.26779	1.87663	3.35659	3.5		1.89737	1.34164	3.16228	2.52982
CDK5 Signaling	-0.333333	0.852803	-0.2	0	1.5		-0.707107	-0.447214	-1.41421	-0.816497
CDP-diacylglycerol Biosynthesis I	0							0		0
Cell Cycle Control of Chromosomal Replication							0
Cell Cycle Regulation by BTG Family Proteins	0						0	0
Cell Cycle: G1/S Checkpoint Regulation	2	-1.94145	-1.26491	-0.816497	-0.632456
Cell Cycle: G2/M DNA Damage Checkpoint Regulation	2.23607	-1.50756	-1.80739	-1.1547	-1.38675			0	-3	-2.44949
Cellular Effects of Sildenafil (Viagra)
Ceramide Biosynthesis	0						0	0		0
Ceramide Degradation							0	0
Chemokine Signaling	1.34164	2.35702	1.34164	2.11058	3.87298		1.63299	-0.707107	2.12132	1.66667
Cholecystokinin/Gastrin-mediated Signaling	2.3094	1.96396	0.894427	2.35702	4.3589		2.7136	-0.707107	1	2.33333
Cholesterol Biosynthesis I							0	0
Cholesterol Biosynthesis II (via 24,25-dihydrolanosterol)							0	0
Cholesterol Biosynthesis III (via Desmosterol)							0	0
Choline Biosynthesis III	0
Chondroitin and Dermatan Biosynthesis	0	0	0		0			0
Chondroitin Sulfate Biosynthesis (Late Stages)								0
Chondroitin Sulfate Degradation (Metazoa)							0	0
Chronic Myeloid Leukemia Signaling
Circadian Rhythm Signaling
Citrulline Biosynthesis								0
Citrulline Degradation	0		0	0			0	0	0	0
Citrulline-Nitric Oxide Cycle			0				0	0	0	0
Clathrin-mediated Endocytosis Signaling
CMP-N-acetylneuraminate Biosynthesis I (Eukaryotes)			0	0	0		0	0	0	0
CNTF Signaling	0	1.63299	0		2.64575		0.447214
Coagulation System	0.904534	0.707107	1.1547	0	1.41421		-0.333333	0	-0.377964	-1.41421
Coenzyme A Biosynthesis	0	0		0	0		0	0	0	0
Colanic Acid Building Blocks Biosynthesis	0						0	0
Colorectal Cancer Metastasis Signaling	0.557086	0.525226	-0.911322	0.745356	5.19615		2.64575	-0.625543	1.91485	2.41404
Complement System	-1.34164	-0.377964	-0.447214	-0.447214	1.13389				1
Corticotropin Releasing Hormone Signaling
Creatine-phosphate Biosynthesis	0							0
CREB Signaling in Neurons	-1.21268	0.447214	0.730297	1	3.4		-0.816497	-1.66667	-0.27735	0.333333
CXCR4 Signaling	1.80739	2.47487	1.21854	3	3.92232		2.5	0	3.20713	2.66789
Cyclins and Cell Cycle Regulation	-1.63299	1.69775	1.78885	0.904534	1.38675			0	1.88982	2
Cysteine Biosynthesis III (mammalia)							0	0
Cysteine Biosynthesis/Homocysteine Degradation	0			0	0		0	0	0	0
Cytotoxic T Lymphocyte-mediated Apoptosis of Target Cells			1.34164					0	-1
Death Receptor Signaling	1.1547	1.22474	2.69408	1.60357	3.29983					-0.447214
Dermatan Sulfate Biosynthesis
Dermatan Sulfate Biosynthesis (Late Stages)								0
Dermatan Sulfate Degradation (Metazoa)							0	0
D-glucuronate Degradation I	0	0	0	0	0		0	0	0
Differential Regulation of Cytokine Production in Intestinal Epithelial Cells by IL-17A and IL-17F				0
Differential Regulation of Cytokine Production in Macrophages and T Helper Cells by IL-17A and IL-17F				0
D-mannose Degradation	0	0		0	0		0	0	0	0
D-myo-inositol (1,3,4)-trisphosphate Biosynthesis								0
D-myo-inositol (1,4,5)-Trisphosphate Biosynthesis							0	0
D-myo-inositol (1,4,5)-trisphosphate Degradation							0	0
D-myo-inositol (1,4,5,6)-Tetrakisphosphate Biosynthesis
D-myo-inositol (3,4,5,6)-tetrakisphosphate Biosynthesis
D-myo-inositol-5-phosphate Metabolism
DNA damage-induced 14-3-3σ Signaling							0	0
DNA Double-Strand Break Repair by Homologous Recombination							0	0
DNA Double-Strand Break Repair by Non-Homologous End Joining	0			0	0		0	0	0	0
DNA Methylation and Transcriptional Repression Signaling	0						0	0	0	0
Docosahexaenoic Acid (DHA) Signaling	0
Dolichol and Dolichyl Phosphate Biosynthesis	0	0	0		0		0	0	0	0
Dolichyl-diphosphooligosaccharide Biosynthesis	0									0
Dopamine Degradation									0
Dopamine Receptor Signaling	-2.33333	0.632456	0	0.333333	1.63299				-0.447214
Dopamine-DARPP32 Feedback in cAMP Signaling	0.229416	1.1767	1.1767	2.71069	2.9824		-1	-1.63299	0	0.816497
dTMP De Novo Biosynthesis	0						0
EGF Signaling		1.89737	0.377964	2.23607	3.16228		1.63299	0		1
Eicosanoid Signaling		2	1	1.34164	1.88982		0
Embryonic Stem Cell Differentiation into Cardiac Lineages					0			0	0	0
Endoplasmic Reticulum Stress Pathway	0			0			0	0		0
Endothelin-1 Signaling	1.21268	4.22577	2.84605	3.27165	4.11597		1.5	1	2.35702	2.5
eNOS Signaling	0.57735	-0.57735	-0.408248	0.218218	1.96396		0.377964	-1.63299	0.333333	0
Ephrin A Signaling
Ephrin B Signaling	1	0.27735	-0.333333	-0.333333	1.89737
Ephrin Receptor Signaling
Epithelial Adherens Junction Signaling
Epoxysqualene Biosynthesis	0						0	0
ErbB Signaling
ErbB2-ErbB3 Signaling					2
ERK/MAPK Signaling	2.52357	1.85164	1.62221	2.29366	3.4125		1.26491	-1	0.27735	-0.632456
ERK5 Signaling	2.23607	1.50756	1.1547	1.66667	3		1.88982		1.34164
Erythropoietin Signaling
Estrogen-Dependent Breast Cancer Signaling	2.23607	1.26491	0.447214		2.23607		1.34164
Estrogen-mediated S-phase Entry		1	1.26491	1.88982	1.89737				0.816497	0.447214
Ethanol Degradation II								0	0
Ethanol Degradation IV
Eumelanin Biosynthesis	0	0		0	0		0
Extrinsic Prothrombin Activation Pathway	0.447214		0.377964				-1.34164
Factors Promoting Cardiogenesis in Vertebrates
FAK Signaling
Fatty Acid Activation							0		0
Fatty Acid α-oxidation
Fatty Acid β-oxidation I							0		0
Fatty Acid β-oxidation III (Unsaturated, Odd Number)	0			0			0	0	0	0
Fc Epsilon RI Signaling	1	3.41121	2.55841	2.84019	4.3788		0.816497	-1	1	0.707107
Fcγ Receptor-mediated Phagocytosis in Macrophages and Monocytes	2.33333	4.32346	3.56887	4.49073	4.38178		1.63299	-0.377964	1.73205	1.89737
FcγRIIB Signaling in B Lymphocytes		2.11058	1.50756	2.64575	2.52982		1.34164		1.63299	0.447214
FGF Signaling	0.377964	-0.258199	-1.60357	0.377964	2.13809		0	-1.41421	-1.41421	0
FLT3 Signaling in Hematopoietic Progenitor Cells
fMLP Signaling in Neutrophils	0.447214	2.88675	2.2	2.32379	4.26401		1.34164		2.12132	1.66667
Folate Polyglutamylation							0	0
Folate Transformations I	0						0	0
FXR/RXR Activation
G Beta Gamma Signaling
GABA Receptor Signaling
GADD45 Signaling							0
Galactose Degradation I (Leloir Pathway)	0						0	0		0
Gap Junction Signaling
GDNF Family Ligand-Receptor Interactions	2.23607	1.80739	1.06904	1.63299	2.11058		1.63299	0	1.34164	1.34164
GDP-glucose Biosynthesis	0						0	0	0	0
GDP-L-fucose Biosynthesis I (from GDP-D-mannose)	0			0			0	0	0	0
GDP-L-fucose Biosynthesis II (from L-fucose)	0	0		0	0		0	0	0	0
GDP-mannose Biosynthesis	0						0	0	0	0
Germ Cell-Sertoli Cell Junction Signaling
Glioblastoma Multiforme Signaling	1	0.353553	-0.179605	0.57735	3.53009		1.38675	-1.26491	0.258199	0
Glioma Invasiveness Signaling	1.41421	2.3094	0.57735	1.94145	3.74166		1.66667	0	2.23607	2.12132
Glioma Signaling	0.707107	1.52753	2.23607	0.904534	3.77124		1	-1	1	1.13389
Glucocorticoid Biosynthesis	0	0								0
Glucose and Glucose-1-phosphate Degradation	0						0	0	0	0
Glutamate Degradation II	0			0			0	0	0	0
Glutamate Degradation III (via 4-aminobutyrate)	0			0			0	0	0
Glutamate Dependent Acid Resistance	0			0			0	0	0	0
Glutamate Receptor Signaling	-1.88982		0.333333	-1	0.816497			-0.816497	0.447214
Glutamine Degradation I				0			0	0		0
Glutaryl-CoA Degradation	0						0	0	0	0
Glutathione Biosynthesis	0		0	0	0		0	0	0	0
Glutathione Redox Reactions I								0	0
Glutathione Redox Reactions II	0			0			0	0	0	0
Glutathione-mediated Detoxification								0
Glycerol Degradation I							0	0	0	0
Glycerol-3-phosphate Shuttle	0						0	0	0	0
Glycine Betaine Degradation								0	0	0
Glycine Biosynthesis I	0						0	0	0	0
Glycine Biosynthesis III		0	0	0	0			0	0	0
Glycine Cleavage Complex	0			0				0
Glycine Degradation (Creatine Biosynthesis)							0	0	0	0
Glycoaminoglycan-protein Linkage Region Biosynthesis							0
Glycogen Biosynthesis II (from UDP-D-Glucose)							0	0	0	0
Glycogen Degradation II	0						0	0		0
Glycogen Degradation III							0	0		0
Glycolysis I
GM-CSF Signaling	0	2.12132	1.13389		2.82843		1.34164			-0.447214
GNRH Signaling	1.38675	1.67126	1.51186	2.68328	4.3788		1.88982	0.632456	1.06904	2.49615
GPCR-Mediated Integration of Enteroendocrine Signaling Exemplified by an L Cell
GPCR-Mediated Nutrient Sensing in Enteroendocrine Cells
G-Protein Coupled Receptor Signaling
Graft-versus-Host Disease Signaling								0
Granulocyte Adhesion and Diapedesis
Granzyme A Signaling							0	0		0
Granzyme B Signaling							0	0
Growth Hormone Signaling	1.66667	1.21268	-0.5	0.632456	1.09109		0.816497	-1	1	1.13389
Guanine and Guanosine Salvage I	0			0	0		0	0	0	0
Guanosine Nucleotides Degradation III
Gustation Pathway
Gα12/13 Signaling	0	0.96225	0.365148	1.29099	2.06474		2.67261	-1	0.707107	1.73205
Gαi Signaling	0	1.14708	1.21854	1.96396	0.852803		1.88982	0.816497	-0.242536	1.26491
Gαq Signaling	1.73205	2.13719	0.685994	1.87663	2.82843		1.50756	-0.707107	1.60357	1.69775
Gαs Signaling	0.258199	-0.447214	-0.727607	0	2.5		1.73205	0	0.534522	2.49615
Hematopoiesis from Multipotent Stem Cells	0			0	0		0	0	0	0
Hematopoiesis from Pluripotent Stem Cells				0
Heme Biosynthesis from Uroporphyrinogen-III I	0			0	0		0	0	0
Heme Biosynthesis II							0	0	0
Heme Degradation
Heparan Sulfate Biosynthesis
Heparan Sulfate Biosynthesis (Late Stages)
Hepatic Cholestasis
Hepatic Fibrosis / Hepatic Stellate Cell Activation
HER-2 Signaling in Breast Cancer
Hereditary Breast Cancer Signaling
HGF Signaling	2.3094	2.2	1.78885	3.05085	3.44124		1.63299	-0.333333	1	1.50756
HIF1α Signaling
Histamine Degradation								0	0
Histidine Degradation III	0
Histidine Degradation VI										0
HMGB1 Signaling	1.41421	2.06474	-0.229416	1.26491	3.63803		2.3094	0.816497	1	0.904534
Human Embryonic Stem Cell Pluripotency
Huntington's Disease Signaling
Hypusine Biosynthesis	0	0					0	0	0	0
IGF-1 Signaling	0.816497	-0.242536	-1.89737	0.707107	0.534522		0.447214	-1	-0.816497
IL-1 Signaling	0.707107	1.70561	1.52753	2.13809	3.60555		1.34164	1	1	2.82843
IL-10 Signaling
IL-12 Signaling and Production in Macrophages
IL-17A Signaling in Fibroblasts
IL-17A Signaling in Gastric Cells
IL-22 Signaling		0.447214	0.447214		1.63299
IL-3 Signaling		1.34164	1.34164		2.64575
IL-6 Signaling	1.63299	1.96396	0.654654	0.83205	1.96396		1.13389		1.13389	1.89737
IL-8 Signaling	2.66789	2.99382	2.3094	3	5.86353		3.29983	0.333333	3.44124	3.8
IL-9 Signaling		1	-0.377964	1	0.377964
ILK Signaling	1.8	0.980196	-0.565685	2.66667	3.88771		3.1305	1	3.29983	3.27327
Induction of Apoptosis by HIV1		0.534522	0.942809	1.50756	0.57735			0		0
Inhibition of Angiogenesis by TSP1	0.447214	0.301511	-0.333333	0	1.41421		1.34164		1
Inhibition of Matrix Metalloproteases
iNOS Signaling
Inosine-5'-phosphate Biosynthesis II	0						0	0	0	0
Inositol Pyrophosphates Biosynthesis	0							0
Integrin Signaling	3.26599	2.17732	1.08866	3.89331	4.90189		2.13809	-0.258199	1.88562	1.5
Interferon Signaling		-1	1		1.34164		0		0
Intrinsic Prothrombin Activation Pathway
Isoleucine Degradation I	0						0	0	0
JAK/Stat Signaling		0.242536	-0.27735	0.377964	0.534522		1			-0.447214
Ketogenesis	0			0						0
Ketolysis							0	0	0	0
Lactose Degradation III	0				0		0	0	0	0
Lanosterol Biosynthesis	0		0	0	0		0	0	0	0
L-carnitine Biosynthesis					0		0	0	0	0
L-cysteine Degradation I	0			0			0	0	0	0
L-cysteine Degradation II	0			0	0		0	0	0	0
L-cysteine Degradation III	0			0	0		0	0	0	0
L-dopachrome Biosynthesis	0	0	0	0	0		0			0
Leucine Degradation I	0
Leukocyte Extravasation Signaling	2.9824	2.59808	2.77746	4.59619	6.00833		2.5	-0.5	3.26599	2.41404
Leukotriene Biosynthesis								0
L-glutamine Biosynthesis II (tRNA-dependent)	0	0	0	0			0	0	0	0
Lipid Antigen Presentation by CD1	0			0			0	0	0	0
Lipoate Biosynthesis and Incorporation II	0				0		0	0	0	0
Lipoate Salvage and Modification	0		0		0		0	0	0	0
LPS/IL-1 Mediated Inhibition of RXR Function	1.41421	0.301511	0.534522	-1.26491	1.50756		0	0	0.447214	1.13389
LPS-stimulated MAPK Signaling	1.41421	3.29983	2.18282	2.82843	4		1.34164	0	2	1.88982
L-serine Degradation							0	0	0	0
LXR/RXR Activation	-0.471405	-2.5	-1.70561	-0.471405	-2.06474		-0.632456	-0.333333	0	0.258199
Lysine Degradation II			0		0		0	0	0	0
Lysine Degradation V			0		0		0	0	0	0
Macropinocytosis Signaling	1.88982	2.67261	2.88675	2.64575	3.60555		1	-1.34164	1	0.377964
Maturity Onset Diabetes of Young (MODY) Signaling								0
Mechanisms of Viral Exit from Host Cells
Melanocyte Development and Pigmentation Signaling	-0.377964	0.57735	-0.5	0	2.52982		1	-2	-0.816497	-0.447214
Melatonin Degradation II							0		0	0
Melatonin Signaling	-0.333333	1.73205	1.80739	2.52982	2.88675		0		1.34164	0.816497
Methionine Degradation I (to Homocysteine)							0	0
Methylglyoxal Degradation III	0	0	0				0	0
Methylglyoxal Degradation VI	0			0	0		0	0	0	0
Methylmalonyl Pathway	0			0			0	0	0	0
Mevalonate Pathway I							0	0	0	0
MIF Regulation of Innate Immunity	0	2.3094	0.83205	1.66667	3.16228		1		1
MIF-mediated Glucocorticoid Regulation	-1	1.63299	1	1.63299	2.44949
Mineralocorticoid Biosynthesis	0	0								0
Mismatch Repair in Eukaryotes
Mitochondrial Dysfunction								0
Mitochondrial L-carnitine Shuttle Pathway							0		0
Mitotic Roles of Polo-Like Kinase
Molecular Mechanisms of Cancer
Molybdenum Cofactor Biosynthesis	0	0		0	0		0	0	0	0
Mouse Embryonic Stem Cell Pluripotency	2.23607	1.88562	0	0	3.35659		0.816497	0	1	1.66667
MSP-RON Signaling Pathway
mTOR Signaling	0.707107	2.78543	1.61645	2.06474	2.98481		0.904534	-0.447214	2.12132	1.66667
Myo-inositol Biosynthesis	0			0			0	0	0	0
N-acetylglucosamine Degradation I	0						0	0	0	0
N-acetylglucosamine Degradation II	0						0	0	0	0
NAD Biosynthesis from 2-amino-3-carboxymuconate Semialdehyde		0		0			0	0	0	0
NAD biosynthesis II (from tryptophan)							0	0		0
NAD Biosynthesis III		0		0	0		0	0	0	0
NAD Phosphorylation and Dephosphorylation							0	0
NAD Salvage Pathway II								0
NAD Salvage Pathway III		0		0			0	0	0	0
NADH Repair	0			0			0	0		0
Natural Killer Cell Signaling
Netrin Signaling
Neuregulin Signaling	-0.301511	0.5	1.29099	2.64575	3.20713		0.447214	-1	0	1.34164
Neuropathic Pain Signaling In Dorsal Horn Neurons	0	1.2792	1.82574	0.774597	3.27165		0.377964	-0.707107	0	1
Neuroprotective Role of THOP1 in Alzheimer's Disease
NF-κB Activation by Viruses	1.73205	2.18282	2.84019	3.74166	4.12311		1.63299	-0.816497	2	1.66667
NF-κB Signaling	-0.258199	1.85934	1.1209	1.56893	4.53557		1	0	0.774597	0.27735
Nitric Oxide Signaling in the Cardiovascular System	1.29099	0.755929	-0.218218	1.5	2.9824		0.377964	-0.447214	2	0.333333
nNOS Signaling in Neurons	-1		-0.816497		1.63299				-1
Noradrenaline and Adrenaline Degradation									0
Notch Signaling		-0.447214	-0.447214	1
NRF2-mediated Oxidative Stress Response	0.816497	2.13809	1.80739	1.66667	2.13809				1
Nucleotide Excision Repair Pathway	0						0	0
Ovarian Cancer Signaling
OX40 Signaling Pathway	1	0.333333	0					0
Oxidative Ethanol Degradation III								0	0
Oxidative Phosphorylation							0	0	0
Oxidized GTP and dGTP Detoxification	0			0			0	0	0	0
P2Y Purigenic Receptor Signaling Pathway	1.06904	1.8	0.426401	1.5	3.29983		0.447214	-0.377964	-0.333333	1.26491
p38 MAPK Signaling	1.13389	1.41421	0.816497	1.38675	2.52357		0.447214		0.816497	2.23607
p53 Signaling	0	0	0.727607	1.63299	0.904534		0		-1.34164	0
p70S6K Signaling	1	3.53009	3.53009	3.35659	3.41121		1.63299		2.33333	1.66667
PAK Signaling	1.26491	0.894427	0.534522	2.52982	2.88675		1.41421	0.377964	2.12132	1.89737
Pancreatic Adenocarcinoma Signaling	1.63299	1.1767	1.2792	2.32379	3.12772		1.88982	0	1.26491	2.12132
Parkinson's Signaling	0
Pathogenesis of Multiple Sclerosis							0		0
Paxillin Signaling	2.52982	0	0	3.16228	2.52982		1.88982	0	0.377964	0.377964
PCP pathway	0.904534	-2.06474	-2.4004	-0.632456	1.88982		1.13389	-1.34164	-0.83205	-0.333333
PDGF Signaling	1.13389	3.20713	1.38675	2.64575	3.63803		1.34164	-0.447214	2	1.13389
PEDF Signaling		1
Pentose Phosphate Pathway	0			0			0	0		0
Pentose Phosphate Pathway (Non-oxidative Branch)	0			0			0	0	0	0
Pentose Phosphate Pathway (Oxidative Branch)	0			0			0	0		0
phagosome formation
phagosome maturation								0
Phenylalanine Degradation I (Aerobic)			0	0	0			0
Phenylalanine Degradation IV (Mammalian, via Side Chain)							0		0	0
Phenylethylamine Degradation I				0			0	0	0	0
Phosphatidylcholine Biosynthesis I	0	0					0	0	0
Phosphatidylethanolamine Biosynthesis II					0		0	0	0
Phosphatidylglycerol Biosynthesis II (Non-plastidic)	0							0		0
Phospholipase C Signaling	1.04257	2.34261	2.08167	3.54965	5.42517		2.23607	0	2.32379	3.63803
Phospholipases
Phototransduction Pathway
PI3K Signaling in B Lymphocytes
PI3K/AKT Signaling	2.12132	1.34164	2.44949	2.52982	2.35702		0.816497	0.816497	1.63299	0.632456
PKCθ Signaling in T Lymphocytes
PPAR Signaling	-2.82843	-2.68328	-2.35702	-0.904534	-3.35659		0.377964	-0.816497	-0.707107	-0.333333
PPARα/RXRα Activation	-1.5	-0.308607	-1.1209	-0.208514	-3.02372		0.707107	0	0.301511	-1.41421
Pregnenolone Biosynthesis								0	0	0
Primary Immunodeficiency Signaling							0
Production of Nitric Oxide and Reactive Oxygen Species in Macrophages	1.21268	4.72746	3.17543	3.18198	4.96397		0.57735	1.50756	3.57771	3.96177
Prolactin Signaling	1.88982	1.88562	0	1.41421	1.78885		1	-1	1	1
Proline Biosynthesis I	0		0	0			0	0	0	0
Proline Biosynthesis II (from Arginine)	0		0	0			0	0	0	0
Proline Degradation	0	0		0	0		0	0	0	0
Prostanoid Biosynthesis
Protein Citrullination	0	0	0	0	0			0	0	0
Protein Kinase A Signaling
PRPP Biosynthesis I	0		0	0	0		0	0	0	0
PTEN Signaling	-0.632456	0.654654	0.894427	-0.377964	-3		-1.13389	0.447214	1.89737	0.301511
Purine Nucleotides De Novo Biosynthesis II							0	0	0	0
Purine Nucleotides Degradation II (Aerobic)
Purine Ribonucleosides Degradation to Ribose-1-phosphate								0
Putrescine Biosynthesis III								0	0	0
Putrescine Degradation III									0
Pyridoxal 5'-phosphate Salvage Pathway
Pyrimidine Deoxyribonucleotides De Novo Biosynthesis I
Pyrimidine Ribonucleotides Interconversion
Pyruvate Fermentation to Lactate				0			0	0	0	0
Rac Signaling	2.64575	2.92119	2.04124	3.20713	3.74166		1.13389	-0.447214	2.7136	0.904534
RAN Signaling	0						0	0
RANK Signaling in Osteoclasts
Rapoport-Luebering Glycolytic Shunt	0			0			0	0	0	0
RAR Activation
Reelin Signaling in Neurons
Regulation of Actin-based Motility by Rho	1.06904	0.898027	0.557086	3.26599	3.77124		1.66667	0.816497	2.49615	1.94145
Regulation of Cellular Mechanics by Calpain Protease	1.34164	-0.632456	0.301511	1.26491	1.73205		2	-1	-0.447214	-1.34164
Regulation of IL-2 Expression in Activated and Anergic T Lymphocytes
Regulation of the Epithelial-Mesenchymal Transition Pathway
Relaxin Signaling	-1.1547	0	-1.69775	-1	2.13809		1.41421	-1.34164	0	0
Remodeling of Epithelial Adherens Junctions		2.7136	2.88675	3	2.44949
Renal Cell Carcinoma Signaling	2	2.11058	1.13389		2.64575		1	0		-1
Renin-Angiotensin Signaling	1.50756	3	1.69775	3.16228	3.63803		0.816497	0.816497	3	2.12132
Retinoate Biosynthesis I								0
Retinoate Biosynthesis II							0	0
Retinol Biosynthesis
RhoA Signaling	0.632456	1.02899	0.948683	1.63299	2.5		2.12132		1.66667	1.1547
RhoGDI Signaling
Role of BRCA1 in DNA Damage Response	0	1.06904	1.60591	1.38675	1.73205		0		1.34164	0
Role of CHK Proteins in Cell Cycle Checkpoint Control	0	-0.707107	-1.06904	-0.377964	0		0	0	-1
Role of Cytokines in Mediating Communication between Immune Cells				0
Role of IL-17A in Arthritis
Role of IL-17A in Psoriasis	0		0	0	0		0	0	0	0
Role of IL-17F in Allergic Inflammatory Airway Diseases								0		0
Role of JAK family kinases in IL-6-type Cytokine Signaling
Role of JAK1 and JAK3 in γc Cytokine Signaling
Role of JAK1, JAK2 and TYK2 in Interferon Signaling							0
Role of JAK2 in Hormone-like Cytokine Signaling
Role of Lipids/Lipid Rafts in the Pathogenesis of Influenza			0		0		0			0
Role of Macrophages, Fibroblasts and Endothelial Cells in Rheumatoid Arthritis
Role of MAPK Signaling in the Pathogenesis of Influenza
Role of NANOG in Mammalian Embryonic Stem Cell Pluripotency		2.23607	1.63299		2.82843		1
Role of NFAT in Cardiac Hypertrophy	0	-0.164399	0.169031	0.625543	4.70679		1.66667	-1.41421	-0.27735	1.50756
Role of NFAT in Regulation of the Immune Response	2.33333	3	2.29366	3.5	4.79583		1.66667	0	1.73205	2.52982
Role of Oct4 in Mammalian Embryonic Stem Cell Pluripotency							0	0
Role of Osteoblasts, Osteoclasts and Chondrocytes in Rheumatoid Arthritis
Role of p14/p19ARF in Tumor Suppression		0							0
Role of Pattern Recognition Receptors in Recognition of Bacteria and Viruses	-1.1547	2.52357	1.60357	2.88675	4.58258		0	-1.63299	3	2.33333
Role of PKR in Interferon Induction and Antiviral Response							0
Role of RIG1-like Receptors in Antiviral Innate Immunity	1	2.44949	2.64575		2.23607		0		0
Role of Tissue Factor in Cancer
Role of Wnt/GSK-3β Signaling in the Pathogenesis of Influenza	0.377964	-2.52982	-2.11058	-1.88982			1	-1.34164	-0.707107	-1.34164
S-adenosyl-L-methionine Biosynthesis							0	0		0
Salvage Pathways of Pyrimidine Deoxyribonucleotides		0		0	0			0
Salvage Pathways of Pyrimidine Ribonucleotides
SAPK/JNK Signaling	1.13389	1.21268	1.5	1.34164	2.13809		1.13389			1.89737
Selenocysteine Biosynthesis II (Archaea and Eukaryotes)	0	0		0	0		0	0	0
Semaphorin Signaling in Neurons
Serine Biosynthesis	0			0				0
Serotonin and Melatonin Biosynthesis					0		0
Serotonin Receptor Signaling
Sertoli Cell-Sertoli Cell Junction Signaling
Signaling by Rho Family GTPases	1.96116	2.39377	0.911322	3.24443	4.5422		1.70561	1.1547	3.83761	2.69408
Small Cell Lung Cancer Signaling
S-methyl-5-thio-α-D-ribose 1-phosphate Degradation	0		0		0		0	0	0	0
Sperm Motility	-0.258199	3.29983	2.04124	2.84019	3.7097			-2	0	-0.377964
Spermidine Biosynthesis I	0		0	0			0	0	0	0
Spermine and Spermidine Degradation I	0						0	0	0	0
Spermine Biosynthesis	0			0	0		0	0	0	0
Sphingomyelin Metabolism	0						0	0	0	0
Sphingosine and Sphingosine-1-phosphate Metabolism								0
Sphingosine-1-phosphate Signaling	1.66667	3.15296	2.13201	2.06474	3		1.66667	0	2.12132	1.13389
STAT3 Pathway
Sucrose Degradation V (Mammalian)	0			0			0			0
Sulfate Activation for Sulfonation	0		0	0			0	0		0
Superoxide Radicals Degradation
Superpathway of Cholesterol Biosynthesis							0	0
Superpathway of Citrulline Metabolism								0
Superpathway of D-myo-inositol (1,4,5)-trisphosphate Metabolism								0
Superpathway of Geranylgeranyldiphosphate Biosynthesis I (via Mevalonate)							0	0	0	0
Superpathway of Inositol Phosphate Compounds
Superpathway of Methionine Degradation							0	0
Superpathway of Serine and Glycine Biosynthesis I	0							0
Synaptic Long Term Depression	-0.688247	1.46059	1.89737	2.4004	3.4125		1.26491	-1.66667	0.534522	1.50756
Synaptic Long Term Potentiation
Systemic Lupus Erythematosus Signaling
T Cell Receptor Signaling
Taurine Biosynthesis		0		0			0	0	0	0
TCA Cycle II (Eukaryotic)	0			0			0		0	0
Tec Kinase Signaling	2.35702	2.46598	1.91485	3.4	5.2915		2.32379	0.301511	3.60555	2.84019
Telomere Extension by Telomerase							0	0	0
Tetrahydrobiopterin Biosynthesis I			0	0			0	0	0	0
Tetrahydrobiopterin Biosynthesis II			0	0			0	0	0	0
Tetrahydrofolate Salvage from 5,10-methenyltetrahydrofolate	0						0	0
Tetrapyrrole Biosynthesis II							0	0	0
TGF-β Signaling	1.41421	1.78885	0.727607	0.707107	2.11058		2.64575	2	2.44949	1.88982
The Visual Cycle
Thiamin Salvage III	0	0	0		0		0	0	0	0
Thioredoxin Pathway	0						0	0	0	0
Thiosulfate Disproportionation III (Rhodanese)	0	0		0	0		0	0	0	0
Threonine Degradation II	0		0	0			0	0	0	0
Thrombin Signaling	0.688247	2.34261	2.41209	2.47487	4.35194		2.18282	0	2.67261	2.66789
Thrombopoietin Signaling	1.88982	3.05085	0.632456	1.63299	3.05085		1			1
Thymine Degradation	0	0	0		0			0
Thyroid Cancer Signaling
Thyroid Hormone Biosynthesis	0				0		0	0	0	0
Thyroid Hormone Metabolism I (via Deiodination)				0			0	0	0	0
Thyroid Hormone Metabolism II (via Conjugation and/or Degradation)								0
Thyronamine and Iodothyronamine Metabolism				0			0	0	0	0
Tight Junction Signaling
TNFR1 Signaling	2.44949	1.50756	1.80739	3	1.66667				1	1
TNFR2 Signaling		1.88982	1.13389
Toll-like Receptor Signaling	-0.377964	1.60357	0.83205	3.16228	3.31662			0.447214	2.23607	2
TR/RXR Activation
Transcriptional Regulatory Network in Embryonic Stem Cells
Trehalose Degradation II (Trehalase)				0			0	0	0	0
Triacylglycerol Biosynthesis
Triacylglycerol Degradation
tRNA Charging	0			0			0	0	0	0
tRNA Splicing							0
Tryptophan Degradation III (Eukaryotic)								0		0
Tryptophan Degradation to 2-amino-3-carboxymuconate Semialdehyde							0	0		0
Tryptophan Degradation X (Mammalian, via Tryptamine)									0
Tumoricidal Function of Hepatic Natural Killer Cells			1.34164	2			0	0	-1
TWEAK Signaling		0.447214	2.11058	0.816497	1.34164		0	0
Type I Diabetes Mellitus Signaling
Type II Diabetes Mellitus Signaling
Tyrosine Biosynthesis IV			0	0	0			0
Tyrosine Degradation I	0			0
Ubiquinol-10 Biosynthesis (Eukaryotic)								0		0
UDP-D-xylose and UDP-D-glucuronate Biosynthesis	0						0	0
UDP-N-acetyl-D-galactosamine Biosynthesis I	0						0	0		0
UDP-N-acetyl-D-galactosamine Biosynthesis II								0
UDP-N-acetyl-D-glucosamine Biosynthesis II								0
Uracil Degradation II (Reductive)	0	0	0		0			0
Urate Biosynthesis/Inosine 5'-phosphate Degradation								0		0
Urea Cycle	0							0
Uridine-5'-phosphate Biosynthesis	0			0	0			0	0	0
UVA-Induced MAPK Signaling	-0.447214	2.66789	1.41421	1.13389	3.60555		0.816497	-0.447214	1.63299	1
UVB-Induced MAPK Signaling	1.34164	1.94145	0.301511	1.34164	3.16228		1.34164	0	2	1.63299
UVC-Induced MAPK Signaling	1.63299	2.49615	2.11058	1.13389	3.31662		2		2	2.23607
Valine Degradation I	0						0	0	0
VDR/RXR Activation	0		0.447214
VEGF Family Ligand-Receptor Interactions	0.707107	1.69775	0.774597	1	3.35659		1.13389		1.34164	1.34164
VEGF Signaling	1.13389	-1.70561	-1.60591	1.26491	1.38675		1.88982	-1	-0.447214
Virus Entry via Endocytic Pathways
Vitamin-C Transport										0
Wnt/Ca+ pathway	1.34164	-0.301511	-0.904534	-0.333333	2.44949				-1.63299	0
Wnt/β-catenin Signaling	-0.229416	-1.1767	-1.51186	-0.654654	-1.60591		-0.904534	-1.63299	-0.534522	-1.60357
Xenobiotic Metabolism Signaling
Zymosterol Biosynthesis	0	0	0				0	0	0
α-Adrenergic Signaling	0.333333	0	0	0.258199	2.32379			-2	0	1.34164
α-tocopherol Degradation	0						0	0	0	0
β-alanine Degradation I	0			0			0	0	0	0
γ-glutamyl Cycle								0
γ-linolenate Biosynthesis II (Animals)							0

## Sheet: UA_vs_0
Upstream regulators	Z-6H	Z-1D	Z-2D	Z-3D	Z-5D		M-6H	M-2D	M-3D	M-6D
(-)-gossypol
(-)-isoproterenol
(+)-MK-801	-1.14738	-1.35227	-0.173029	-1.1406	-1.52427		-0.301511	-1.40556	-1.45151	-1.27301
(5-(4-N-methyl-N(2-pyridyl)amino)ethoxy)benzyl thiazolidine-2,4-dione			0.246183	-0.738549	-0.282843
(6)-gingerol
(R-(R*,S*))-threonic acid			1.98248
(S)-duloxetine
[D-Ala2,N-Me-Phe4,Gly5-ol]-Enkephalin	2.18643	1.94426							-1.16867	-2.16846
[Nle4, D-Phe7] -Alpha-MSH
1-(carboxymethylthio)tetradecane	-1.96396
1,1-bis(3'-indolyl)-1-(4-trifluoromethyl-phenyl)methane
1,1-diethyl-2-hydroxy-2-nitrosohydrazine
1,2-dimethylhydrazine		0		0.447214
1,2-dithiol-3-thione	2.90313	5.5514	1.41566	3.54473	1.80434				1.87435	1.79209
1,4-bis[2-(3,5-dichloropyridyloxy)]benzene	1.73839	2.66137	1.41794	3.27468	3.24827		1.96449	2.133	1.60367	1.42389
1-[2,3-bis(furan-2-yl)quinoxalin-6-yl]-3-(4-bromophenyl)urea
11,12-epoxyeicosatrienoic acid		2.38521	2.57895	2.17663					0.640184
12 lipoxygenase
12-(3-adamantan-1-yl-ureido) dodecanoic acid					-2
12(S)-hydroxyeicosatetraenoic acid
12-hydroxyeicosatetraenoic acid
13-hydroxyoctadecadienoic acid		0.5547	0.152499	1.06749			-1.06749
14,15-epoxyeicosatrienoic acid
15(S)-HETE		0.492366		1.4771
15-deoxy-delta-12,14 -PGJ 2	-0.0984798	0.450095	0.107164	-0.632686	-1.41134		-0.0646257	-0.868117	-0.571142	-0.785904
15-LOX
16,16-dimethylprostaglandin E2		-0.624721
17-alpha-ethinylestradiol	0.834442	0.635696	0.952729	0.279276	1.48528		-0.3451	1.44823	1.12713	0.777656
17alpha-hydroxyprogesterone caproate
17beta-estradiol dendrimer conjugate
18-alpha-glycyrrhetinic acid
1'-acetoxychavicol acetate	-2.23607	-2		-2	-2
1alpha,25-dihydroxy-previtamin D3
1-butanol
1-chloro-2-(2,2,2-trichloro-1-(4-chlorophenyl)ethyl)benzene		-0.492366
1L-6-hydroxymethyl-chiro-inositol 2-(R)-2-O-methyl-3-O-octadecylcarbonate		0.762493		-0.152499
1-methyl-2-pyrrolidinone
1-methyl-4-phenyl-1,2,3,6-tetrahydropyridine	2.57626	3.02619	2.66102	2.72737	3.23877		1.96957	1.44821	2.02504
1-O-hexadecyl-2-N-methylcarbamol-sn-glycerol-3-phosphocholine
2-(3-chlorophenylamino)phenylacetic acid
2,2-dimethylbutyric acid
2,2'-dipyridyl
2,3 butanedione monoxime	0.372572	-0.512321	-0.659699	-1.11772	-0.764706				1.98248	0.2
2,3,4,7,8-pentachlorodibenzofuran		-0.444286							0.213201
2,4,5,2',4',5'-hexachlorobiphenyl			-2.5	-1.06904					-1.73205
2,4-dinitrophenol-ovalbumin conjugate	1.89737			0.707107
2-[[4-[(e)-styryl]phenoxy]methyl]oxirane
20alpha-hydroxycholesterol
22(R)-hydroxycholesterol				0.677646					-0.318231	-0.492537
22(S)-hydroxycholesterol				0
24-hydroxycholesterol	-0.297343	0.717395	1.29838	1.27262	0.571976		1.18474
25-hydroxycholesterol	-1.45258	-0.39657	-1.73752	1.06908	-0.627395		0.744906	0.162179	1.22686	0.0996611
26s Proteasome	-1.77171				-0.912871		0.182574	-0.784465
27-hydroxycholesterol		2.39077	1.29606	1.96549						-0.685994
2-amino-1-methyl-6-phenylimidazo-4-5-b-pyridine	2.52982	2.85322	1.91237	2.53837					2
2-amino-3-phosphonopropionic acid
2-amino-5-phosphonovaleric acid	-1.92387	-1.28353	-0.650814	-1.91343	-1.39004		-2	-1.37361	-0.384081	-1.35401
2-aminopurine			-1.93927
2-arachidonoylglycerol	-0.357407	-0.386124	-0.164716	0.448026	-0.604294		-0.495623	-1.06385	-0.347788	-1.06385
2-bromoethylamine				2.72809	2.7196		1.91237		2.4327	2.4327
2-cyclohexen-1-one
2-mercaptoacetate	0.762493
2-mercaptoethanol		-0.882498						-1.09109		-1.06749
2-methoxyestradiol				-0.391329	-0.42268
2-morpholin-4-yl-6-thianthren-1-yl-pyran-4-one
3,3'-diindolylmethane	-1.81445	-0.330173	-1.41044	0.0422592	-1.00484				-1.20227	-0.245157
3,4,5,3',4'-pentachlorobiphenyl		-0.750403		-0.840023	-0.0940077		0.749812		0.718421	0.416585
3',4',7-trihydroxyisoflavone
3,4-dihydroxyphenylethanol
3,5-diiodothyronine		-1.34164	-2.64575				-1	-2	-2.23607	-2.23607
3,5-L-diiodothyronine	1.06749	1		0
3,6-bis(1-methyl-4-vinylpyridium)carbazole diiodide
3,6-bis(4-methyl-2-vinylpyrazinium)carbazole
3-deazaneplanocin							-0.607047	-0.276329	0.258448
3-hydroxyanthranilic acid			0.762493
3M-001				2
3M-002				1.96865	1.96865			1.96865	1.96865	1.96865
3-methyladenine									0.147871
3-methylcholanthrene								2	2.07592	2.22378
3-nitropropionic acid		-0.065862	-0.0827208	1.48963	0.317518		0.973399	1.30078	0.657258	1.8498
4-[(4'-chloro-2'-fluoro)phenylamino]-6,7-dimethoxyquinazoline
4-coumaric acid
4-hydroxynonenal		-0.806377			-0.264724		1.35904	0.289346	1.1698	0.641642
4-hydroxytamoxifen	1.11024	1.10778	1.61322	2.05471	1.89374		0.651312	1.82689	2.34143
4-methylcatechol
4-methylnitrosoamino-1-(3-pyridinyl)-1-butanone	2.04419	1.77548	1.38812	1.50142	1.84193
4-nitroquinoline-1-oxide	1.00974	2.95006	2.23535	2.54329	2.95006			2.77843	2.77843	2.77843
4-nonylphenol
4-phenylbutyric acid		0.976557	0.322118
4-tert-octylphenol	2.13719		1.88982
5,6,7,8-tetrahydrobiopterin
5,8,11,14-eicosatetraynoic acid	-1.95283		-1.70941						-0.218218	0.447214
5-azacytidine	1.46505	0.223714	0.653985	0.997302	2.09949		1.68785	0.420007	0.998668	0.142774
5-fluorouracil		-1.02575	1.38284	-0.949468	0.420569			0.744263		0.774341
5-hydroxytryptamine	1.34767	1.52515	0.0873942	1.93996	2.45843		1.89276	1.9849	0.921733	1.63835
5'-methylthioadenosine				-0.447214	-2
5-N-ethylcarboxamido adenosine	2.15509	0.840501	0.522287	0.634002	0.539479		0.420287	0.358589	1.24373	0.824659
5-O-mycolyl-beta-araf-(1->2)-5-O-mycolyl-alpha-araf-(1->1')-glycerol	2.83683	0.208514		2.13809	1.5		2.32379
5-thio-D-glucose
6,7-dinitroquinoxaline-2,3-dione
6-amino-4-(4-phenoxyphenylethylamino)quinazoline	-1	-1	-1.19208
6-bromoindirubin-3' oxime					1.09109		1.09109	-0.654654		-1
6-cyano-7-nitroquinoxaline-2,3-dione
6-hydroxydopamine	0.047597	1.61808		0.359211	0.936586			0.0880451	1.25724	0.844926
6-mercaptopurine		-1.38675	-1.38675		-2.2188			-1.06749	-1.06749
7,8-dihydro-7,8-dihydroxybenzo(a)pyrene 9,10-oxide
7S NGF
8-(4-chlorophenylthio)-guanosine-3', 5'-cyclic monophosphate				0.433555
8,9-epoxyeicosatrienoic acid
8-bromo-cAMP	2.00062	-1.14342	-1.59304	-0.508002	-0.495437		-0.646659	0.204362	0.993838	0.15778
8-bromoguanosine 3',5'-cyclic monophosphate		1.72609	2.35847	0.852803	1
8-chloro-cAMP
8-chlorophenylthio-adenosine 3',5'-cyclic monophosphate										-1.92427
8-epi-prostaglandin F2alpha
8-hydroxy-2-(di-n-propylamino)tetralin	0.0301923
9,10-dimethyl-1,2-benzanthracene	2.84014				2.0497				2.0816
9-cis-retinal
9-hydroxyoctadecadienoic acid
9Z,11E-octadecadienoic acid			-2.40757				0.440086		-2.2188	-0.94299
A23187	1.69403	2.43265	-0.426236	2.62311	3.10767		1.61469	2.02796	2.42478	1.51109
A2M				1.93449
AA-861
ABCA1	0.113458	0.35046	-0.246161	0.160385	0.282843			-1.02899
ABCB4	-1.97697				-1.92539		7.35622e-17	-2.80478	-2.80478	-2.62068
ABCB6			1.11688					0.447214	0.816497
ABCB7	0.282843
ABCC1	2.4327	1.54898	1.54898	2.2188	2.4327		0.762493	0.900366	1.95083	1.20593
ABCC4					0.132453
ABCC8		1.9799	2.41625
ABCC9
ABCG1	-2.13767
ABL1	1.94145	1.43684		1.03916	0.871277		1.90726	0.977864	1.24818
ACACA		-1.1094	-0.762493	-1.1094					-1.1094
ACACB		-1		0
acadesine
ACAT1
ACE	1.06749		1.06749				1.06749
ACE2				-0.848528	-0.762493		-1.98248
acetaldehyde		1.91237		2.6295	2.4327			1.38675	1.66448	1.38675
acetaminophen	1.95861	1.33551	0.889542	2.23082	1.89905		1.55477
acetovanillone		0.0598718	0.50891	-0.940822	-1.39149		-1.94666	-1.94666	-2.35907	-1.7693
ACHE			1.34164	1
ACKR1
ACKR2										-2
aclarubicin
ACLY
ACO1			1.98248
ACOT13
ACOX1	-0.977356	-0.0553001	-0.62385				-2.93178	0.727607	1	2.33036
ACP1
acriflavine
acrolein	1.4533		1.80757		0.675725
acrylamide
ACS84
ACSL5	0.816497			0.896258	1.38675		-0.27735		0.5547
ACTA2		-1	-0.447214
ACTB		2.23607	1.88982	2.44949	2.44949			2	2	2
ACTC1
actinomycin D	-2.22361	-0.667614	-0.317734	-2.145	-1.8831		-3.74251	-2.20088	-2.47271	-1.94708
actinonin			3.16228					2.23607	2.23607
ACTL6A		0.707107	1.41421	1.13389	1.13389			0.447214		0
ACVR1
ACVR1B
ACVR1C		-0.27735		0.152499	0.152499
ACVR2A
ACVRL1	1.26038	0.92056	0.594706	0.255363	1.0581		-1.29987
acyclic retinoid					-0.246183
acyline
ADA	-1.95962			-1.40556	-1.95083			-2.18643	-2.18643	-2.18643
ADAM10			1.96652
ADAM21	0
ADAMTS12	-1.13389	-2.44949	-2.33333	-2.64575	-1.88982		-2.23607	-2.23607	-2.44949	-1.88982
ADAMTS9
adapalene
Adaptor protein 1		1	1	1
Adaptor protein 2
ADCY					1
ADCY5	1	2	0	1	1
ADCYAP1	2.03691	0	-0.575171	0.624716	0.899815		1.27403	0.654836	0.49	0.512532
adenosine				-0.79873	0.0885615		0.269191	-0.0512316	-0.0469841	-0.342791
ADGRG1
ADGRG3
ADIPOQ	0.531497	-1.87265	-1.2073	-1.63576	-1.2885		-0.126554	-0.109484	-0.927328	-0.190234
ADIPOR2			0.27735	0					-0.152499	-0.152499
ADM	-0.0603013			-0.189157	-0.303231
ADORA2A	1.26399	0.699863	0	0.300834	0.654273		0.0652328	-0.896258	-0.594622	-1.446
ADP	1.40671	0.904819	0.113961	1.29181	1.29181		0.130189	0.130189	1.01413	-0.242536
ADRA1
ADRA1A
ADRA1B		-0.152499
ADRA1D
ADRB	0.819128	0.0518309	-0.509292	1.06	-0.258106		-1.41421	-0.630733	-0.324236	-0.241423
ADRB1
ADRB3									0.454545
ADRM1
advanced glycation end-products	1.0555	0.440225		0.474579	1.45651		1.45651	1.48025	1.81641	1.35295
AEBP1		-1.45831	-0.59612	-1.1717				9.42055e-17	-0.390567	-0.390567
AFF1
AFF4
AFP		1.9868			1.9868
AG490	-1.55915	-1.06759	-0.376522	-1.86209	-2.82978		-1.70885	-1.54241	-2.41145	-1.98313
AGA
AGER		0.841802						1.26796	0.985389	-0.352611
agmatine		-1.65589	-1.44452	-0.751725	-1.58818			0.353443	-0.391186	-0.728608
AGN194204	1.42915	0.290583	0.620505	1.43482	2.00522		-0.143592	1.04934	1.28506	-0.0731272
AGO2		0.057073							1
AGPAT2				0.447214
AGPAT9	0.447214		2	0						0
AGRP
AGT	3.30552	1.76753	0.914759	4.7056	3.9419		2.20848	3.45708	4.43184	3.47883
AGTR1	0.694808	2.32561	1.46261	1.96931	0.61017		1.06749	0.5547	0.894737	0.896258
Agtr1b	0.650945	0.242536	-1.1094	0.152499			-0.685994
AGTRAP	0.845154
AHI1	0.707107		0.333333	0.377964			-0.816497	0	-0.707107
AHR	1.18089	0.289622	0.486703	-0.661276	-0.111526		2.89644	-0.341661	-2.11407	-0.90143
AICAR		-0.451292	-0.653366	-0.77732	-1.64934			-0.73579	-0.73579	-0.06689
AIF1
AIP		-0.958315
AJUBA
AK1
AKAP13
AKAP5
AKR1B1
Akt	2.61833	1.73267	2.7722	2.7711	3.53797		1.65372	1.65267	2.22769	1.80653
AKT inhibitor VII
AKT1	1.92368	1.30814	0.0962335	1.68119	1.94635		0.681574	1.50845	2.09361	1.43092
ALB	1.92006				1.96865		2.17893		1.95917	0.784489
aldesleukin		1.91265		2.23607
ALDH1A1		1.36895		0.958315						0.958315
ALDH1A2			0.512321					-1.66448	-2.2188
ALDH2		-1.74416		-1.66448	-1.66448		-1.40841		-1.66448
aldosterone	3.86437	1.39794	1.44801	2.10499	2.32938		1.99427	2.00283	3.00646	2.23938
alefacept							-2.44949
aliskiren
alitretinoin	1.01923	-1.86958	-0.380259	-1.58988	-1.21859		-0.272683	0.504987	-0.187803	1.61578
ALK
ALKBH5
allopregnanolone	-0.5547
allopurinol		1.1384	2.10295	2.55841	2.83683		1.06904	0.774597	2.35702	2.13809
allosamidin
allyl isothiocyanate		1.98248							0.762493
ALOX12		1.10927	0.393611	0.804722			1.95432
ALOX15		0.622908	0.421063	1.51283				1.97246	2.2111	2.2111
ALOX15B
ALOX5	-0.500969	-0.425864		-0.646997			0.341882		0.307794	0.341882
Alpha catenin	-2.68345	-0.344577	-3.36903	-4.58735	-4.52895		-1.17946	-3.93953	-4.47374	-3.98873
alpha-adrenergic receptor
alpha-amanitin
alpha-amino-3-hydroxy-5-methyl-4-isoxazolepropionic acid
alpha-hydroxyglutarate		-1
alpha-tocopherol							-0.0220809	-0.270719	-0.754599	-0.419916
alpha-tocopherol succinate		-0.0246108		-0.762493
alvocidib	-2.9095	-1.39466	-1.73033	-2.41378	-2.93485			-1.99756
ALX3
Am 580			1.55971	-0.090167	1.03717		0.211767	-0.0474045	0.794236	0.152106
amantadine
AMH				2.19089	1.96116
amifostine
amino acids	-0.646997	1.97871e-16	1.06467		0.797724		1.40841	0.130189	7.26812e-17
aminoglutethimide			-0.152499
amiodarone	0.301511	0.258199	0.258199	1.1547	0.632456		-0.377964	-0.447214	-0.333333	-1.13389
amitriptyline	-0.74638	-0.686969	-0.213201	-0.427154	-0.640184					0.45511
amlodipine	-2.44949	-1.41421	-0.632456	-2.44949	-2.12132		-1	-1.34164	-2	-2
ammonia
ammonium chloride			-0.213201		2
Ampa Receptor	1.1717		1.1717
amphetamine	0.687966	0.780678	-1.90526	0.753771	1.47113		1.53304	0.693642		0.232431
AMPK	-0.900417	-1.30535	-3.39368	-0.613775	-1.50698		0.867122	0.0861145	-0.692938	-0.137067
amsacrine
anakinra	-1		-1
anandamide		1.76212	1.91237	2.77843	2.00651				2.19036
androgen	-2.17663	-1.05559	0.015718	-0.860292	0.0307583		-1.77647	-1.61077	-1.20808	-1.2112
andrographolide			-0.640345					-0.766046
anethole
Angiotensin II receptor type 1
ANGPT1	0.727607	1.25357	0.80829	1.98248	0.762493
ANGPT2	2.59012	3.17719	3.85512	4.92837	4.82907		0.994642	3.11379	3.53893	3.20602
anisomycin	0.287456	0.344395	-1.32386	0.733501	1.85743			0.956183	1.73036
ANK1
Ank2
ANPEP	-1.95083	-1.95083
ANXA1	-0.838445	-0.95209	-0.918705	-0.706714	-0.856657		-0.159313	-1.0613	-1.0613	-1.0613
ANXA2		0.0957826		0.872872			1.45521			0.80829
ANXA7	-1.21268	-1.41421		-0.774597	0			-0.710742		0
Ap1	1.23431	0.981266	-0.123736	2.01881	2.73234		2.95216	2.96048	3.50203	3.50203
AP3B1
APBB1		0.016891	-1.36524	0.411765	1.11765					-0.218218
APBB2
APC	-2.00657	-2.30985	0.0052593		-2.58319			-1.4	-2.22834	-1.84115
APC (complex)
APC/APC2	0.365148	-0.928477	0.730297	-0.6	-0.447214
APEX1
APH-1
APH1A		0.130189
apicidin		1.19523	0.478091
apigenin	-1.40214	0.644658	-0.668965	0.340503	-0.846649		-1.75641	-1.75641	-1.70941
aplidine	1.10265	1.10265
APLN		-0.141105	-1.20729	-1.10868	-0.781094		0.707107
APOA1	-0.766296	0.677839	1.0355	0.854199	-0.189787				-0.585176
APOA4		0.225813		0.957518	0.957518				0.471405
APOE	-2.86384	-2.99853	-1.82693	-2.59318	-3.50393		-2.58163	-2.23066	-3.16588	-2.45968
apomine
apomorphine		2.18497		1.24196	1.34882
APP	3.40823	3.32675	2.22135	2.82872	2.52662		3.45209	2.01213	2.42479	2.37495
APPL1
aprepitant
aprotinin
apyrase
AQP1			-0.741999				0	-1.13137
AQP4
AQP5	-1.9799			-1.9799
AR	-0.132497	-0.879679	1.58774	0.589982	0.230889		1.18277	2.13477	2.60264	3.07502
arachidonic acid	-0.624711	1.24682	-0.330007	1.22664	0.84756		1.2291	2.21681	1.21414	1.82376
arachidonyltrifluoromethane
arecoline	0.11547	-0.911322
AREG	1.61096	2.42261	2.2845	2.78155	2.5957		2.40291	2.20491	2.41994	2.42087
ARHGAP18
ARHGDIA	-1.38675	-1.98248
ARHGDIG			0	-2	-1.34164					0.447214
ARHGEF12
ARHGEF25			1
ARHGEF28
ARID4A				0.848528
ARID4B				0.762493
ARID5B
ARNT	2.39071	-1.37049	-1.25956	-0.660801	-0.863879		0.971894	0.862662	0.918092	1.05337
ARNT2			0.866025	2.06419	2.87352		0.377964			2.71069
ARNTL		-1.12308		-0.639021	-1.14656		0.200502
aroclor 1254			1.95083
arotinoid acid				-1.45521	-0.784987		-0.156174		-1.81964
ARRB1
ARRB2		-0.640184	-0.956183	0.152499	-0.447214			-0.128037	-0.896258	-0.128037
ARSA
arsenic		-1.95962	-1.95962		-2.19036				0.896258
arsenic trioxide	0.406172	0.224021	-0.627197	1.31297	0.0999343		1.85068	0.691955	0.497434	-0.152856
arsenite	1.25396	1.3038	0.571048	0.781126	1.05331		1.44817	1.49643	1.49643	0.714324
artemisinin
artesunic acid	-2.21321	-2.21321		-2.21565	-2.21565					-1.98248
ASAH1	1.24517		1.74416					0.970143
ASCL1	0.84411	0.472241	1.99973	-0.215041	2.38785		0.993661	1.64648	0.476463	2.10656
ASCL2
ascorbic acid	0.461065	-1.49585		-1.32386	-0.579934		1.23625	-0.392792	-0.368345
ASH2L
asiatic acid										-0.685994
ASIP		-0.0678844		-1.09109	-0.440086			0.581318	0.581318	0.966282
asoprisnil	-2.33126		-1.2675		-1.70561			-1.13389	-0.333333
asparagine
aspirin	-2.9396		-2.09271	-2.32738	-1.9651			-3.06433	-2.94212	-2.91363
astragalin	-1.1094						-2
astressin 2B	2.18938				0.468521
Atf
ATF1	0.220863	1.13137	-0.57735						0.152499	-0.390567
ATF2	1.68099	-0.430793	-0.0648581	1.29313	1.98374			1.07546	1.82243	0.314188
ATF3		-0.0615085	-1.38765	-1.87281	-2.05732		0.00897002	-0.616196	-1.21458	-1.20359
ATF4	1.96373	1.71479	0.284245	1.64828	0.225585			1.0467	1.45812	-0.218663
ATF5
ATF6		-0.941662	-0.819737	-0.941662	-0.941662		0.0383201		-0.0678844	-0.140894
ATF7IP
ATG12
ATG7	-1.33145	-0.712009		0.463947	-0.271381		-1.9799	-1.96946	-1.96946	-1.9896
atipamezole
ATM	-0.739014	0.283134	2.06121	0.62438	0.522722			-0.0851599		-0.403057
ATN1
atorvastatin	-1.80084	-1.30985	-1.11292	-2.04567	-3.03092		0.946483	0.459149	-1.20782	-0.427998
ATP	0.846799	1.24763	0.489925	1.15693	2.16666		0.0250311
ATP1A1
ATP2A1
ATP2A2		0.816497		1.34164	0
ATP7B	-0.301511	-0.534522	-0.258199	-1.1547	-0.904534			-1.88982	-1.41421	-1
ATP9A
ATPase
ATP-gamma-S	1.9531				1.15074
ATR	-1.98248		-0.640184		-1.1717					9.42055e-17
atrasentan
atrazine
Atrial Natriuretic Peptide					-1
atropine
atypical protein kinase C
auranofin	-0.294118	-1		-1	-0.691564		0.0628695	0.0628695		0.0628695
AURKB		2.64575	2.23607	1.63299				2
aurothioglucose								0.762493		0.27735
aurothiomalate			0					1
AVI-4126
AVP	-0.0666904	0.125767			1.53897			-0.519875	0.27735
AXIN1					-0.650945				-1.96396
azathioprine		-1.40556	-1.95083							-1.10265
azetidyl-2-carboxylic acid		1.43208		1.43208
AZGP1		1.11772	1.36895		0.390567
azoxymethane	0.70967	-0.285944	0.24903	0.348984	0.877865		1.45914	1.95969
B2M	2
B4GALNT1
BACH1	0.467806
BACH2		-1.77503		-1.10328	-1.27288
bafilomycin A1		-2.21565
BAG1		2								1
BAIAP2
baicalein	-0.386576	-1.08896	-0.73579	-1.22651	-1.46059		0.5547	7.18311e-17	-0.307794	7.18311e-17
baicalin		1.95664	2.23607	2.96787	1.80427		-0.112509	2.64575	1.40556	1.15439
BAK1	2.4327		2.6295				2			0.896258
BAPTA-AM		0.393957		-1.07701	-1.30287		0.314347	-0.59976	-1.53436
bardoxolone		0.798621	-0.0894427	6.66134e-17	6.66134e-17		1.69775		0.727607	6.66134e-17
bardoxolone methyl				-1.11772	-1.94145
BARX2								1.06749	1.15404
batimastat		0.896258	2.21321	1.93733	1.93733		-0.27735	1.38675	1.38675	1
BAX	1.91237	2.359	3.05796	2.15666	1.19523					0.787562
Bay 11-7082	-1.12375			-1.78796	-2.7742		-1.51749	-2.59415	-2.20471	-2.58022
BBC3
BBI608	-1	0.632456	-1.24316		-1.21226		-2.4327
BCAN
BCAP31
B-cell receptor
BCKDHA
BCL11A
BCL11B							-1.91237
BCL2		-2.71465	-2.16508		-1.15239					1.5067
BCL2L1								1.91404
BCL6			2.56335	1.77667	1.43266			1.36947	1.49229	1.09286
BCL6B		2.21321
Bcl9-Cbp/p300-Ctnnb1-Lef/Tcf		0.746729
BCR (complex)		-0.430399		-0.232657	0.689931		0.30428
BDKRB2	-1.12309				-0.370739			-0.22493
BDNF	0.709289	-0.617973	-0.242234	0.218022	0.690305		1.0199	-0.750842	0.207289	2.15535
bee venom	1.17691	-1.28098	-2.44056	-1.62918	-0.555916		0.128402	-0.49868	-0.744631	-1.46189
benazepril
benfluorex
benzamide
benzene	-0.242536	0.599625	1.92308	0.83205	1.94145			1.88982	1.89737	1.50756
benzo(a)pyrene	0.382528	-0.319248	0.231705	0.59705	-0.0604071		0.110257	0.252264	1.04825	0.629086
benzyl isothiocyanate		0.894737	-0.128037	-0.764706	-1.09109				-1.09109
benzylamine
benzyloxycarbonyl-Leu-Leu-Leu aldehyde	1.31234	0.0747818	-0.353509	-0.279188	-0.67854		-1.16783	0.502526	0.249706	-0.396066
beraprost			-0.640184
berberine		-2.15449	-2.06908	-2.1712	-1.77336			-1.85346
BET
beta-1,3-glucan	0	-0.816497						1	0.447214	1
beta-carotene				-0.507673				0.478091	-0.562544	-0.507673
beta-cyclodextrin				-1.13137
beta-estradiol	3.60364	1.94768	1.83461	2.06879	2.09849		2.62063	2.92826	3.48283	2.88819
beta-glycerophosphoric acid							1.9799	1.1717
beta-hydroxyisovaleric acid		-0.958315
beta-naphthoflavone		-2.37608		-1.15594	-1.51072
betulinic acid	-1.93733	-0.862662	-1.53897	-1.12858	-1.50966		-0.896258	-2.23607	-2.4327	-1.91237
bevacizumab		1.98248	1.98248
bexarotene	-2.09911	0.267808	0.832971	-0.0520998	1.49944		-1.88018	-1.22076	-1.03541	-0.7959
bezafibrate	0.803473	-0.294372	-1.56407	0.532666	0.28				-0.344904
BHLHE40			-1.96895
bicalutamide	-0.388514	0.912871		-0.787562	0.725866				0.426401
bicuculline	1.19071	1.07202	-1.27132	2.72021	1.76398		1.13389	0.194054	0.422813	-0.820303
BID		2.44949	2.13767	2.44949	2.64575
BIIB021
bile salt
biotin	1.94426
BIRC5	-2	0.117041
bis(4-hydroxycinnamoyl)methane
bisindolylmaleimide	-1.41108	-1.34944	-2.35108	-1.34944	-1.65103		-0.37923	-0.727607	-1.29399
bisindolylmaleimide I	-2.47395	-1.09562	-2.48546	-2.99977	-3.69846		-2.14636	-3.18032	-3.81128	-3.16797
bisindolylmaleimide II
bisphenol A	0.903839	1.8297	0.133198	2.35759	1.93908		0.445506	0.198246	1.84339	0.816874
bivalirudin
bleomycin	2.84201	2.29795	3.92472	4.43693	4.10697		0.838177	3.18968	3.89283	3.9076
BLOC1S5		1.69775	0.215666
BLVRA
BMI1	-0.314224	0.55046	-0.457914		0.0849858				1.96865
BMP	2
BMP10	2.36968	-0.446159
BMP15	0.73646	1.74416	2.56273	1.99323	1.78227		1.98248	1.98248	1.38675	1.64996
BMP2	1.86901	0.247626	1.47982	2.07265	2.56433		2.36723	2.61847	2.21961	2.00728
BMP4		-0.893277	0.614241	0.288171	0.651285		0.309921	1.54099	0.997356	1.44652
BMP6	2.6447	1.10381	1.04917	1.53093	2.27079		2.0794	0.629512	0.655521	1.10105
BMP7	1.65046	-0.0746071	1.2588	-0.0625142	0.965843		1.72263	1.14542	1.09913	0.776427
BMPER		1.54604
BMPR1A		0.196437		1.04386	1.92909			1.19523	0.598204	1.3195
BMPR1B	1.29399			0.725866	1.09109			1.66448	1.66448	1.70941
BMPR2		0.987208
BMS-387032
BMS-690514	-1.89737	-3.5	-2.49615	-3.35659	-2.7136			-2.52982	-2.11058	-2.11058
BMS-754807	-0.377964	-2.23607	-0.377964
BNIP3L	0.895167	-1.91404	-1.19925	-0.790569	-1.8462			-1.94145	-1.29099	-1.60357
BO-653
BOC
Boc-D-FMK		1
bortezomib	1.55653	2.97441	1.00496	1.60436	0.668225				0.677948	-0.0516568
botulinum toxin type A
BQ 123
BQ-788			0.5547
BR-4628
BRAF		-1.17595
BRCA1	-0.984845	-0.383026	-0.668987	0.159531	-0.267702		0.86418	0.852544	0.169552	1.23142
BRD2
BRD4	0.569341	2.3343	1.37481	2.81753	2.71446		1.69331	0.125542	0.114203	-0.20844
brefeldin A		0.593417	0.500819	-0.0191425	0.951803		1.05453	0.825904	0.201969	-0.210216
brimonidine
BRMS1
bromocriptine								2.21321	1.9799
bromodeoxyuridine								2.23607
bryostatin 1	1.98248				0.390567
BSCL2
BSG										1.97635
BTBD7
BTC	0.816497	1.34164	1.63299	1.63299	1.34164					1.34164
BTG2			-1.1306
BTK	1.75472						1.79552		1.49137
BTNL2	1.34164	0.511891	1.88562	0.285714	0.790569			1.26491
bucladesine	2.58257	-0.672555	0.00510438	0.921572	0.729556		2.07482	0.981306	1.4765	-0.0585061
budesonide	0.232147	0.29119	0.136428	-0.375919	0.93646			1.15162
bufalin		-0.707107		-1.13389	-0.816497
bumetanide
buparlisib
bupivacaine
butaprost	-0.437195				-0.161515		-0.417585	-0.417585	0.105118
buthionine sulfoximine		2.4327	2.2188	2.4327	2.4327				1.98248
butylated hydroxyanisol				0.925868	0.530838				1.96865
butylated hydroxytoluene				1.98052	1.98052
butyric acid	0.138668	0.0229754	-1.47909	-1.21442	-0.418042		1.7062	-0.262712	-0.296662	-1.90738
butyrine
Bvr
C/ebp			2.05882	1.35294	2.05882			1.82321	1.82321	2.05882
C1QL1
C1QL3
C1QL4
C5					1.46552		1.85138
C5	2.21321
Ca2+	1.83652	0.371636	1.1677	1.56216	1.51938		0.811865	0.754168	1.2933	1.22961
CACNA1C			1
cadmium		2.63787	1.00941	2.74356	1.80924			1.25539		0.0502872
cadmium chloride	1.60054	2.30109	2.18795	2.73727	2.22635		0.886758	0.0414079	0.693443	0.0414079
cadmium sulfate
CADPS
caffeic acid
caffeic acid phenethyl ester	-0.171075	-0.205997	-1.89603	-1.34359	-2.42713		-0.23046	-1.8835	-1.62864
caffeine	-0.646307	1.21354	-0.0113953	1.64484	1.44324		0.307794	0.24577	0.411406	0.588348
CALCA	0.498502	-0.534848	-1.02813	0.155769	0.225092		-0.262111		1.93676
Calcineurin A		-0.762493	-1.1094
Calcineurin protein(s)	-0.506756	-1.72178	-1.21311	-1.01523	-0.971783		-0.18332	-0.220962		0.986127
calcipotriene	-0.113961			1.43208	1.69775		-0.27735		1.38675
calcitriol	-0.754827	-3.14354	-2.34915	-3.88072	-3.72845		0.64531	-4.51037	-4.38745	-3.57849
calcium chloride
CALCR
calmidazolium		-0.870388		-2	-1.34164				-2
Calmodulin	-0.0622724							-0.123091
calpain			0.256158	0.390567
calpeptin			0.341882						-9.42055e-17
calphostin C		-0.563595	-0.331063	-1.97115	-1.49075		-1.6918	-1.75591	-1.58647	-2.00017
CALR		-0.0377805	0.184228	-0.0417905				0.807007	0.75028	1.73488
calyculin A		-1.13389		-0.816497	-1.13389
Camk
CAMK2A		1.1138		1.1138	1.1138
CAMK4	1.99954			2.18577	2.18577			1.9799	1.94362
CaMKII	-1.1717	-0.492366			-0.927173			1.9799		1.9799
CAMKK2
CAMP	2.81818	2.19089		2.56273	2.24781			1.91237	2.13767
cAMP-Gef
camptothecin	2.04605	0.904552	-0.0814099	1.12855	2.25489		1.30244	0.0644818	0.485708	-0.069764
candesartan	-1.85789	-1.0016	-1.84506	-2.05419	-2.16366		-0.963338	-2.56516	-2.42536	-2.42536
candesartan cilexetil		-1.34164			-1					-1
cannabidiol	0.632681	1.28718	0.239983	1.01587	0.478091			0.896258	1.38675	0.896258
cantharidin	-0.342997	-0.342997
CAPNS1		-0.084707		1.00438
capsaicin	1.47224	1.2376		-0.180452	-0.341025			-0.984529	-0.586224	-0.586224
capsazepine	-0.864923	-0.864923
captopril	1.14904	1.73957	2.53849	1.70764	2.58407		0.686795	1.64648	2.22143	1.25208
carbamylcholine				1.06165	1.95432				1.17278
carbenoxolone					1.4771		1.9868			1.9868
carbohydrate			-0.507673	-0.787562
carbon monoxide	-0.32616	-1.62872	-1.30718	-1.91069	-1.93694		-0.449582	-0.735969	-0.735969	-0.519586
carbon tetrachloride	0.744139	-0.680193	-0.514841	2.05129	2.00926		0.971932	1.58632	1.98251	2.37117
carbonyl cyanide m-chlorophenyl hydrazone	-0.124035	-0.659897		-0.868243	-0.601929		0.83205		1
carboplatin			2.03447	2.53837	1.66667				2.35975
carboxyamido-triazole
carboxymethylflavin
cardiotoxin	1.38942	1.69775	2.55841	2.66789	4.24264		1.41421	2.3094	2.84019	2.52274
CARHSP1
cariporide
CARM1		1.06749		1.38675	1				1.06749
carnosine		-1
carnosol			0.908236					-0.0292979	0.304034	-0.0292979
carrageenan	1.79198	2.00217	0.767529	2.5084	3.07138		3.22333	2.16793	2.92608	2.19086
carvacrol
carvedilol		-0.136717	1.23045	-0.509175	-0.820303		-0.156174			0.254457
CASP1		-0.478913
CASP3	0.216089	1.42256	1.2027	1.72328	1.48775
CASP8		0.4
caspase	1.98248	0.956183		1.34164	2
CASQ2		-1.06749	-1.06749
CASR		-1.08678		-0.0107602
CAST		-0.61017			-1.96865
CASZ1		-1.29743	-1.64673	-0.738549	-1.06287		0.588348	-1.1767	-1.39497	-0.958194
CAT	-1.84343	-1.33359	-2.43733	-1.41421	-1.44381
CAV1	2.33081	0.0131414	0.340211	0.876027	0.38341		0.764706	-0.377964	0.632456	0.333333
CBFA2T3	-1.1717		0.492366	0.132453	0.492366
CBFB	-0.0701862	-0.452792	-1.63299	-0.58788	1		0			0.301511
CBL		0.101535	0.250943	0.426401
Cbp/p300				2				-0.152499	-0.152499	-0.152499
CBP-ICSBP-IRF-1-PU.1
CBR1
CBX1										0.293105
CBX2
CBX3										-1
CBX4
CBX5
CBX7		-0.463389	-0.463389	-1.67216	-1.67216		-2	-1
CCAR1		-0.152499	-0.152499
CCK	1.95794								1.93776	0.390567
CCKAR
CCL1
CCL11	3.10939	2.01655	2.94069	2.59177	2.01655		1.7566	2.60801	2.41512	2.37685
CCL18		-0.4842
Ccl2	2.77014			1.67286	1.23391
CCL2		-1.28136	-0.816963	0.0619043	0.719636		-2.2696	0.0304009	0.251942	-0.4689
CCL3	2.20043
CCL5	2.74502						1.9799
Ccl6		1.19452		1.96865	1.96865					1.15404
CCNA1
CCNA2
CCNC
CCND1	3.01103	4.41077	3.89336	3.49614	4.4802		-0.214967	3.45767	3.65443	3.37258
CCND3
CCNE1		1.02565		1.66448	1.66448			1.38675	1.38675	1.38675
CCNK	-2.37232	2.15728	1.84545	1.78737	2.56495			2.56495	2.39869	1.78737
CCNT1
CCR1		1.61615	1.94145	2.15789	2.15789				1.91485	1.21854
CCR5		2.34063	2.08746	1.99792			1.98996			1.99781
CD 437	-1.83824	-1.75842	-0.292418	-3.74264						0.0152552
CD14	1.60139		1.78221		2.25244		2.37243	1.93878	2.18101	1.96089
CD2					2.33333					2.2188
Cd2+
CD24	-0.0678844	0.950586	0.979071	0.475191	1.69099				2.30677
CD247				1.88982						2.44949
Cd24a
CD28	-3.97809	-3.2454	-2.41444	-2.27639	-2.69664		-2.00333
CD3	-5.33165	-4.36521	-3.08008	-3.50028	-4.00589		-3.65603	-1.63262	-2.23812	-1.41268
CD300LF
CD36				2.44949	2.23607
CD38	3.70271	1.74846	1.52931	1.79154	0.796298		2.25326	2.26762	3.17219	2.44109
CD3E	-1.96865	-2.4327		-2.4327	-2.60709
CD4					-0.38829
CD40	1.7713			2.55019	2.86429			2.67921	2.04621	2.62442
CD40LG	1.54962	3.01583	1.74008	3.41772	3.63245		2.4569	2.96495	3.62595	3.12512
CD44	2.341	1.43387	2.89145	3.04703	3.15517		0.865653	2.35087	2.55264	3.65154
CD47			1.91237		1.38675
CD5	1.94936				1.94936
CD53	0.447214
CD82
CD86			2
CD9	1.47277	-0.121811		0.0418751	-1.23023		-0.241834	-0.817624	-1.19273	-1.19273
CD99	0.8616	0.8616	-0.232495
CDC20
CDC27
Cdc42		-1.97566	-1.97566	-1.97566	-1.97566
CDC42	0.447214							0.816497	0.447214
CDCA2
CDCA7L
CDH1	-1.41896	-1.22788	-0.690308	-0.960839	-1.24354		-0.0465746	-1.23025	-1.68418	-1.32382
CDH11	0.101535	0.632456	1.26491						1.13389
CDH2	1.95962
CDH3
CDH4
CDK1		1.13137
CDK12			1.00291
CDK2		-0.164399	0.377964	0	-0.377964			0.447214	0.447214
CDK2AP1
CDK4			0.254457
CDK6			1.13137	0.282843
CDK8		-0.868243	-2.22027
CDK9	1	1.82321	1.45565	1.82321	1.06878		1.60629	0.242536	0.654654
CDKN1A	-2.61145	-3.51473	-3.35104	-3.00345	-3.32911		-0.630209	-2.87453	-3.38289	-2.78574
CDKN1B		0.167845	1.53987	-0.8578	-1.13712		-0.423659	0.953821	-0.606977	-0.839181
Cdkn1c	0.447214	0.6	0.928477	0.218218	0.6
CDKN2A	-2.10547	-4.67906	-5.44179	-3.94495	-4.23506		-1.57691	-4.06819	-5.18752	-3.66906
CDKN2B
CDX2	2.15789				1.28069		1.95962
CEACAM1	-2.2188	-2.80365	-2.62109	-2.21321	-2.2188
CEBPA	2.06202	2.22779	2.16372	2.31443	2.62518		1.01385	0.635454	0.818517	0.801722
CEBPB	3.28567	1.46482	2.87054	2.03931	3.58857		1.72189	0.828204	2.2421	0.942064
CEBPD	1.39087	0.680043	1.94361	0.661238	0.403337		1.66396	1.78197	2.00594	2.06477
CEBPE	1.44523	0.333231		1.08553	1.16646		0.314485	2.21321	1.78208	2.42487
CEBPZ
CELA2A
celecoxib	-1.43694	-0.122034	-1.13291	-1.10877	-2.02991				-1.63897	-1.32907
CELF1		0.342997	0.342997
cephaloridine	0.77829	3.18053	1.93316	3.4625	3.09655		0.483494	1.58251	1.67332	1.92055
ceramide							-0.348228		0.481664
cercosporin
cerivastatin	1.04286	-0.402002	0.105214	-0.179627	-0.845782		0.420425	-0.0896269	-0.0155233	-0.0896269
CERS2
cerulenin
ceruletide	1.94758	1.94758		1.4	1.71823
CETP	-0.640184			-1						0
cetrorelix									-1.98248
cetuximab/radiotherapy
cetylpyridinium
CFB			2	0.447214
CFTR	-0.637993	-1.68934	-1.68934	-1.28103				-1.81071	-2.56905	-2.72809
Cg	1.68749	0.866844	0.0479482	1.9672	3.20697		2.24865	2.35754	2.66004	1.40826
CGA		0.0130004		1.02711	1.54863			1.08764		0.245328
CGB (includes others)			2	2.40114	2.19036					1.98248
CGS 21680	1.35652	0.658115		1.26144	1.04878			-0.349581
CHADL	0.904534		-0.57735				-2.44949	-1.88982	-1.66667	-1.26491
CHD4	0.359211	-0.39736	-0.0392534	-1.71791	-1		1	0.447214	-0.377964	-1.67126
CHD7	-0.5547						0.762493
CHEK1		0.25351		-0.963338	0.25351				-0.527589
CHEK2		0.218218	0.218218		0.218218				1.09109
chelerythrine	-2.23607	-1.066		-0.896258	-1.63299
chenodeoxycholic acid		-1.22443	-1.31849	-1.73455	-1.02148		1.54457	0.311836	0.704228	-0.401312
CHFR
CHGA
CHI3L1
CHIR-124
chitosan
chlorcyclizine		0.447214		0.447214						0
chlordiazepoxide
chloride
chlorophyll a
chloropromazine	-0.857493	0.215666	-0.920575	0.896258	-0.113961		-1.21268	-0.797724	0.128037	-0.640184
chloroquine		0.0650282	-0.342578	-0.402982			-2.22834	-2.20541	-2.20541
cholecalciferol	2.25408	1.37105	1.49477	0.606815	1.55158		1.44935	1.02521	0.419717	-0.0340311
cholesterol	0.0287371	0.482837	0.29554	1.2021	1.31582		-1.15339	0.317024	-0.418112	0.316095
cholesterol sulfate		0.492366		1.13137
cholestyramine
cholic acid	-1.08688	0.461302	0.547462	1.2835	-0.130405		0.759698	-0.574549	-0.323998	-0.270953
choline		0.810894	0.249068	-2.13459	-1.43621		-0.447214
choline fenofibrate		0.922068		-0.176048	0.35944
chondroitin sulfate A
chondroitin sulfate E
CHRD			0
CHRM1			-1.74439	0.810767	0.810767
CHRM3					0.762493
CHRM4
CHRNA4
CHRNB2
chromium				-2.12132			0.112509		-2.4327
chrysin
chrysotile asbestos		2.18643	2.18643	2.18643
CHUK	2.76167	1.5988	1.90801	4.26553	4.61748		2.23203	3.16274	3.22649	3.12392
ciclopirox olamine
CIDEC		1.26491
cigarette smoke	2.48247	1.08495	0.849902	2.01091	2.47491		2.76168	2.20558	2.35062	1.52797
ciglitazone	-1.43023	-0.715097	-0.228907	-0.728243	-1.40848		-1.02399	-1.10667	-1.60867	-1.5589
CIITA			-1.89239		-0.62252
cilostazol	-0.388514	-0.846649	0.588348	-0.112509	-0.710742		-0.478091	-1.46261	-1.70561	-0.787562
ciprofibrate		-0.147979	-0.681794	0.4919	-0.502459		2.26115	0.21793	-1.00505	-1.50763
ciprofloxacin	0.658505	-1.12747	-0.23355	-1.49677	-0.894427		0.258199	0	0.777778	0.777778
cisplatin	1.69425	1.57148	2.70273	3.42565	4.45812		3.09376	1.40666	3.21127	3.35453
cis-urocanic acid	2.42487		1.74574	1.9799			1.9799		1.1717
citalopram									-0.152499
CITED1
Ck2	0.764706	0.640184		0.762493
CKS1B		2.21863	2.21863	2.21863	2.21863
CKS2
CLASP2
CLCA2		0.467606
CLCN5			-0.242536	-1.13137	-1.13137
CLDN1
CLDN2	1.06749
CLDN3
CLDN4
CLDN6
CLDN7	0.842484	-0.430528	0.495074	1.16278	0.855337		0.477334
CLEC11A	1.7581	1.54807	0.948815	0.621874	1.93667
CLEC7A					1.10881
clenbuterol	1.1717	1.98248			2.21321				1.98248
CLOCK		-0.762493		-0.762493	-1.1094
clodronic acid							-0.447214
clofibrate	-1.94251	-1.79133	-2.79025	-1.41421	-0.914981		1.17402
clomipramine		1.34164
clonidine		-0.5547		-0.5547	-0.5547
cloprostenol
clorobiocin
clozapine	1.11396	1.73211	0.547585	0.848867	1.63189				0.234164
CLU		-1.03923	-0.633581	1.93373	0.848528
CNB-001	0.27735	0.640184	0.640184					1		0
CNOT7
CNP
CNR1	-0.711563	-1.02891	-0.267657	-0.698498	0.637577		0.856565	1.11494	0.848026	0.830474
CNTF (Ciliary Neurotrophic Factor)	2.59274	2.25506	2.28072	2.26879	1.69824		1.66109	0.658772	0.502164	-0.705279
CNTN1
Co2+
cobalt chloride	2.5438	1.31976	-0.0939636	1.40872	1.67119		0.949795	1.38713	1.90926	1.76647
cocaine	1.68275	1.61251	1.8028	1.45201	1.58177		1.10134	1.16615	1.64502	0.547139
coenzyme Q10			-1.70588		-0.152499
COL18A1	-3.48498	-0.151954	-0.766704	-1.1498	-2.80039		-1.73928	-1.94666	-2.60209	-2.41967
COL1A1
COL4A3		-1.9799	-2.21321	-2.21321	-2.21321			-1.9799	-2.21321	-2.21321
COL6A1		-1.24289	-0.707107		-1		-2.44731	-1.96145	-1.19392	-0.877338
COL9A1		-1.9868	-1.9799		-1.23091		0.27735	-1.38675	-1.06749	0
colcemid
colchicine	1.52596	0.776715		0.187838	1.77301		0.93724			0.607122
colesevelam
Collagen Alpha1	1.95567	0.431124	1.53365	1.57868	1.57868		1.12042	1.57868	1.57868	1.86285
Collagen type I	3.26448	0.894675	1.54913	3.44036	2.48		0.996241	2.76069	2.44	2.63697
Collagen type III	0.795662	-1.94066	-0.918708						-0.848528
Collagen type IV	0.213201	0	-0.787562	0.707107	0.707107		1	0.816497	0	0.707107
Collagen type V	0.795662								-0.848528
Collagen(s)		1.32354	0.970154	1.06901	0.784987		-0.019996		1.06901	-0.424178
COMMD1		0.0940721	1.3598	1.41421	1.63299		-1.34164	-0.447214	-0.816497
COMMD3-BMI1			-1.8034							-2
conjugated linoleic acid	-0.528626	-1.35464	-1.35464	-2.00651	-1.25763		-0.896258	-1.7085	-1.16815	-1.01587
copper sulfate
cordycepin
corticosterone	0.278676	-0.19022	-1.20988	-0.264446	-0.104463		-0.438723		-0.196226	-0.74698
coumermycin
coumestrol
Coup-Tf
CP-55940	2.23607			2	1.34164
CPE	0.695491				-0.0978232
CpG ODN 1668	2.43089		2.58712	2.23779	2.27673		2.18661	1.96549	2.18661
CpG ODN 1826	1.91225	2.13463	2.3978	2.09582	3.07021
CpG oligonucleotide		2.0564	2.69853	2.87234	2.90159		2.21421	1.80941	2.13533	2.28982
Cpla2
CPT1C			-2
CR1L		-0.912871		-2.97044	-2.74955		-0.354914	-2.74955	-2.74955	-2.91318
Creb	0.625543	-0.694707	0.582428	1.31309	1.76262		-0.27028	1.48749	2.70176	1.9515
CREB1	0.911938	1.31528	-1.37593	2.83169	1.27899		0.746401	0.864865	0.904523	1.12534
CREB3L1			1.34804	1.09109	0.436436		0	0.5547	1.43208	1.43208
CREB3L3							-1.31091			-0.161619
CREB5
CREBBP	0.920408	1.27289	0.820115	1.81073	2.0453		2.31451	2.56153	3.3466	2.39759
CREM	-0.260422	0.68963	-0.929874	1.32987	1.71171		-0.792406	-1.94334	-1.76997	-1.71347
CRH	1.88176		-0.78203	1.07374	0.886613			-1.5091
CRHBP
CRHR1	0.106		-0.741999	-0.351123	0.106		-9.42055e-17	-1.13137
CRHR2	-1.28745				0.57735
crocidolite asbestos	1.34051	1.79019	0.178127	1.62852	2.43397		2.39905		2.19531
CRP			1.79871
CRTC2	0.676716	-0.314485	0.450835	-0.492366	0.927173		0.738549		0.492366	-0.848528
CRX					0.0678844
CRY1					0.104828
CRY2
CRYAB					0
CSF1	3.75598	3.85264	3.18953	3.85779	3.91044		3.10041	2.3481	2.92184	2.03959
CSF1R		1.02565	0.436436	1.02565	1.19523
CSF2	2.99038	7.44615	6.72806	7.485	8.41201		2.33478	6.51003	6.38916	7.00523
CSF3	3.0458	2.75525	2.09148	3.91956	4.20518		1.6843	2.69499	2.32251	0.998977
CSF3R
CSH1/CSH2
CSHL1				1.2287	1.06853		0.900278	0.246684	0.737926	-0.2366
CSNK2A1		-0.152499
CSNK2A2
CST3	-0.5547	-1.2636	-1.21268	-1.06749	-1.06749				-0.152499
Ctbp	-1.56131	-0.536895			-1.15404
CTBP1	-0.69192	-1.00859	-0.165675	-0.928477	-2.15789		0	-2.23607	-1.71957	-1.2376
CTBP2
CTF1	2.20106	1.81646	1.59563	1.81646	2.16594
CTGF		0.102623		2.96107	3.4658		0.0366608	1.8958	2.39471	2.12058
CTLA4					-2.26301
CTNNAL1
CTNNB1	3.0757	-0.277842	-0.184956	2.46393	3.64217		1.71017	2.22894	2.47143	2.14614
CTR9
CTS-1027
CTSB		0.957966		1.9799	1.43208
CTSD
CTSK
CTSS		2.6295		2.23607	2.23607		1.06749			1.98248
cucurbitacin B		-2.18643	-1.40556	-2.18643	-2.18643
CUL4B		1.02565	1.94099
cuprizone	1.06474			0.50549	0.0628695				1.98248
curcumin	-2.20152	-0.0870499	-1.0674	-3.03642	-4.21432		-2.57561	-2.78474	-3.30331	-2.28093
CUX1	-0.520306	-1.60723	-0.274901	-1.94145	-1.94145		-0.640184		-0.972387	-1.38675
CX3CL1	2.13767	2.2188	1.91237	1.98248			2.2188	1.98248	2.2188	1.98248
CXCL1	1.98248	1.98248
CXCL10	1.94066	1.94066		1.94066	0.929889
CXCL11
CXCL12		1.59865	0.224343	1.50308	3.16614		0.88624	0.879194	2.29584	2.03744
CXCL8	1.89028	1.46833	1.52817	2.28395	2.28395			1.45756		1.8242
CXCL9
CXCR4		0.705279	1.02653	1.53285	1.75397
cyanidin 3-O-glucoside
cyanocobalamin	0.787562		1.54303		0.218218		0.896258
CYBA		-0.640184	-0.27735	0.152499	0.152499				0.5547
CYBB									2	2
cyclic AMP	3.28892	0.594872	0.787638	2.80475	2.38036		1.59006	0.19006	0.774816	1.44016
Cyclin D
Cyclin E		0.970143	0.128037	0.5547	0.152499
cyclohexanecarboxylic acid
cycloheximide	-0.955068	-0.707981	-1.11501	0.158256	-0.570583		0.649179	-0.695142	0.175831	-1.87694
cyclomaltodextrin			1.95283
cyclooxygenase	2.21321	1.98248	1.98248		1.98248
cyclopamine					0.821995					1.19523
cyclophosphamide			2.07509		1.92831				1.78308
cycloserine
cyclosporin A	-1.75356	-0.0471001	0.228638	-1.57125	-1.4119		-0.439501	-0.40794	-0.612542	-0.731994
cyclosporin H
CYP
CYP19A1		-0.990328	-2.66312	-1.90913	-0.923768				-0.542397	0.341613
CYP1A1	1.09322	0.821995	0.428571	0.468521	0.35132		0.557086		0	0.780869
CYP1A2				0.904534	1.26491		0		0	0.301511
CYP1B1	1.38344	0.895167	1.10282	1.17485	1.17485		0.710742	0	0.737309	0.737309
CYP27A1		0.569803	-0.056888	0.417585						-0.899229
CYP27B1			1.93544
CYP2E1	2.18995	1.84101	1.80361	2.5774	2.5774		0.624035	1.92764	1.92764	1.92764
CYP2J2	1.1094	2.19036	2.40114	1.98248
CYP3A		0	0
CYP4A11
CYP4F2		-0.27735	0.152499		0.152499
CYP51A1	0.377964	-1.88982		-1
CYP7A1	2		0.816497	1.34164						-1
CYP8B1
CYR61	2.27188	1.94898	0.59024	1.76282	1.76282		1.29403	1.73205	2.23592	2.41106
CYSLTR2
cysteamine
cytarabine		-0.323708								0.391304
cytochalasin B		-1.73205	-0.57735	-1	-1		-2	-1
cytochalasin D		1.39388		1.14961	-0.294216		-0.442593	0.0136241	-0.546195	-0.397942
DAB2IP
DACH1	-1.96116	-1.2675		-1.96116	-1.37281
dacinostat		0.754599			-0.561644				-1.01587
DAG1		-2
daidzein	-0.19245	1.4596	0.2	0.625543	1.2792			0.301511	0.471405
dalfampridine	0.632456	-0.169031	-2.37577	2.13201	1.02576
D-alpha-hydroxyglutarate
dasatinib				-1.4771	-1.03923			-1.19208	-1.19208	-1.19208
daunorubicin		-0.588348	0.990148	0	0.569803
DBF4B
DBH
DBI
DBP				-1.73205
DCLK1	1	-0.27735	-0.152499
DCN	-1.91326	0.188323	-0.316838	-0.991048	-0.347862		1.28142	-0.199238	0.0486566	-0.0284052
DDB2
DDIT3							2.20723		1.01478
DDR1		-0.567993	-0.0588235	1.18474	1.18474			0.902608	0.902608	0.902608
DDX17		1		0.57735	1
DDX5		0.57735		0.57735	0.57735
DDX58	2.10518	2.75752	2.75752	2.18019
decanoic acid
decitabine	1.06087	0.04665	1.87437	2.06699	2.69887		0.72748	1.09094	2.08364	1.48223
decursin		-0.816497	-0.816497	-0.816497	-0.816497
DEF6		-0.528278		1.32924	2.2154				2.2154	1.41184
deferoxamine	1.91176	-0.0969758	-0.89956	0.14949	0.604732		1.31056	0.454843	1.16245
defibrotide
dehydroisoandrosterone		-0.666653
DEK
delta-9-tetrahydrocannabinol		1.84396	0.550401	1.39116	1.39116			1.45184	1.45075	1.43853
deltamethrin
deoxycholate	1.83757				2.39562
deoxycorticosterone acetate	1.28787		-0.203616	0.107521	0.493865
deoxynivalenol	-0.953508	-0.548254		-0.09759					1.73205
DERL1
DES		-0.933628
desipramine	0.704621				0.326285					1.97246
desmopressin	0.237172	-0.29173	-1.14441	0.961074	0.990148		-0.588348
desmosterol
desoxycorticosterone	2.2111	1.99378	1.99378	1.99378	2.2111		2.2111	1.98052	2.2111	2.2111
DETA-NONOate		1.12644	2.46432	0.521505	1.16284		2.02224	1.80531	2.27557	2.40758
devazepide
dexamethasone	0.338063	-2.25946	-0.0604296	0.253533	1.0451		-0.87136	-1.67016	-0.738827	-0.151126
dexamethasone phosphate	0.710742	-1	-2.52982	-1.13389	-1				-2.23607	-1.88982
Dexamethasone-GR
dexfenfluramine
dexmedetomidine				0.654654
dextran sulfate	2.46885	0.966988	1.2888	1.46059	2.20113		1.34804	1.45521	1.45521	1.1717
dextroamphetamine
D-fructose		0.827606		1.22788			0.490261	1.63299	1.26867	1.15935
D-galactosamine		1.04035		1.70643	3.08266
DGAT1
DGAT2			1.06749	-1.98248
DGCR8	0.5547	-0.38829	0.647059	1.06749	1.06749			1.06749	1.38675
D-glucose	0.803916	0.185758	0.813363	1.88404	2.00409		1.3493	-0.204827	0.54053	1.2933
DHX9	-0.5547
di(2-ethylhexyl) phthalate			-1.23359
diacylglycerol
diallyl disulfide		0.118861						0.260919		0.260919
diazoxide	0.478091			-0.821995	-0.816497				0
dibromoacetic acid
dibutyl phthalate		0.767678							0.776338
dibutyryl cGMP
DICER1	0.429301	-0.457744	0.895142	-0.529738	-1.01075		-0.432222	-0.35859	1.15055	0.518013
dichloroacetic acid					0.27735
dichlororibofuranosylbenzimidazole			-1.98248	-1.06749	-1.71499		-0.685994
dichlorovinylcysteine	2.78862		2.61019
diclofenac		0.409616	0.307491	0.169031	0.0475114
dienogest
diethylmaleate	0.45161		0.220036				1.53162	1.95868		1.93449
diethylnitrosamine				1.18322	1.4853		2.53374		0.0932505
diethylstilbestrol		1.48751	1.56416	0.9222	1.42649			1.81388	1.87865	0.506231
dihydroartemisinin		-1.81195	-1.96895	-2.19025	-2.4028
dihydro-beta-erythroidine
dihydrolipoic acid
dihydrotestosterone	0.618676	-0.0205806	1.33011	2.06562	2.86733		1.04863	1.89338	1.78282	1.49625
dimethyl fumarate		0.650945			1.06749
dimethyl sulfone
dimethyl sulfoxide	1.0329	-1.56755	-0.85851	-1.61316	-0.627165			-0.0485025	-0.519974	0.228654
dimethylnitrosamine		0.090076	0.365482	0.20073	0.898921		-1.77503	0.143528	1.03169	0.441573
dinoprost	2.59028	1.46875	0.718223	0.870886	0.542602		1.33221	1.09508	2.09467	1.61724
DIO2
DIO3			-0.13194				0
diosgenin		0.196116		0.896258	0.128037
diphenyleneiodonium	-1.4957	0.238336	-0.242166	-1.4856	-1.53207		-2.27833	-3.0945	-1.97796	-2.45531
Diphtheria Toxin			0.707107		2
dipyridamole		0.478091		-0.5547	-1.06749			-1.06749		-1.06749
DIRAS3							2			0
discodermolide
dithiothreitol	-2.21321	0.102598	-1.50966					-0.152499	1.40841	0.113961
DKK1	-2.35944	-0.293455	1.24646	-0.0388955	-1.67748		-1.38325	0.216574	-0.33896	0.0409273
DLC1			-0.152499
DL-fructose			0.658505	-0.414214						-0.658505
DLG4
DLK1
DLL1	1				1.73205
DLL3		-2
DLL4	0.479022	-0.734553
DLX1
DLX4
DLX5
D-lysergic acid diethylamide
DMD	0.457936	0.826084	-0.115326	0.743905	0.564631		-0.748429	-2.4327	-2.34521	-1.36895
DMP1		-0.298142		-0.0848189	-1.28571		-0.187317	-2.04939	-2.12132	-1.79415
DMRT1
DMTF1
DNAJA3
DNA-methyltransferase
DNM2
DNMT1					-1.09541					-1.45204
DNMT3A
DNMT3B	0.654654	0	-0.208514	0.27735	-0.57735
docetaxel	-0.411693	1.83925	1.45204	1.31742	1.26456		1.96865	0.636613	1.42014	1.36895
DOCK8				1.88982
docosahexaenoic acid	-1.3204	-1.23326		-1.28844	-1.5912			-1.39265	-2.20807	-1.95516
DOK2
domoic acid	1.33973	1.25275	1.9799	0.958315					1.97246
dopamine	-0.687012	1.25941	0.479153	-0.0343199	0.419284		0.712677	0.23355	0.37931	0.0743294
DOT1L
doxifluridine		1.05963
doxorubicin	1.82045	0.783516	0.521543	2.09741	1.77819		0.214107	-1.57204	-0.0204333	-1.09217
doxycycline		-0.281527		-0.313368	-0.507191		0.957777	0.0373374	-0.982386	-0.823895
D-Pen-2,5-enkephalin
DPP4		-0.143486	-0.256158	-0.870936	-0.0969003		0.440086	-1.23091		-1.50111
DPY30
DRAP1
DRD1				1.12121
DRD2	1.28826	1.86465	1.48963	2.17815	1.88237			-0.784465	-1.14749	-0.449089
DROSHA
DSP		-1.1717	-1.1717	-1.45521	-1.1094			-1.38675	-1.38675	-0.5547
DSPP
D-thioctic acid	-1.09109	-1.09109
DTNBP1		0.0417574	0.338715	0.578947	0.371391		-1.91005	-0.5547	-1.96652	-1.96652
D-tubocurarine
DUSP1					-0.161229
DUSP5					-1.63299
DUSP6
DVL1
Dynamin
DYRK1A		-2.80976	-2.80976	-2.80976	-2.80976			-2.97551	-2.80976	-2.80976
DYSF
E. coli B4 lipopolysaccharide	2.54125	1.90811	2.70325	4.50257	3.98978		2.43487	1.87918	3.34661	3.03636
E. coli B5 lipopolysaccharide	2.90327	2.79755	3.30063	4.44004	3.96869		3.46664	3.45684	2.30234	3.18746
E. coli serotype 0127B8 lipopolysaccharide	0.646088	1.37019	1.61802	2.332	1.98494		2.31341	1.92264	2.13545	0.884162
E2f	1.60612	3.92559	4.63698	3.68921	3.65632			3.64135	3.87477	3.35938
E2F1	0.935531	4.19788	4.46933	4.07	3.9512		1.73786	4.05364	4.7697	4.2608
E2F2	0.816968	2.53661	2.29242	2.02069	2.72437			3.16228	2.76986	1.95311
E2F3	-0.393218	1.43757	2.13925	2.23766	2.59318			2.78861	2.78861	1.65147
E2F4		0.0140456	0.917303	-0.293991	0.0154543
E2F5
E2F6	-1.28026	-2.52714	-2.32379	-1.88192	-1.50756			-0.575429	-2.11058	-0.537134
E2F7
E2F8
E64
EBF1		-0.0778597	0.275168	-0.135983	0.288226		-0.554062	-2.28445	-1.26376	-1.9645
EBF2	1.54604	-0.0909091		0.816497	1.34164					2
EBI3					1.46482
ebselen		0.294118	-0.159674	-0.727607	-1.98248		-1.25275	-2.20723	-2.20723	-2.20723
ecdysterone
ECE1
EDAR
EDF1
EDN1	4.71029	1.20233	1.74165	4.04208	4.56405		2.65401	2.94917	3.76415	3.56085
EDN3	1.41421	-0.164399	-0.164399	1.63299	0.816497				1.34164
EDNRA		0.896258		1.98248	1.98248			1.98248	1.38675	1.38675
EDNRB
edratide
EED
EEF1A1
EEF1A2	-1.34164	-2.23607	-2.23607	-2	-1.63299
EFEMP2
eflornithine		-1.32223	-1.88207	-1.00758	-1.05856			-1.26491	-1.38675	-0.632456
EFNA5
EFNB2		0.80829							1.19208
EGF	2.61648	2.53314	2.10243	4.94542	4.15857		4.2142	3.63425	3.98985	3.43284
EGFR	2.25289	3.0854	1.76816	3.53425	3.84047		2.1949	2.45018	2.62575	2.36013
EGLN1		0.827981	0.83189	0.824621	0.672022		-0.50549
EGR1	1.58741	0.593417	1.16635	2.12249	2.82647		0.827704	2.25728	3.2208	2.605
EGR2	1.44111	-0.580584	0.638337	1.28251	1.83404		1.58558
EGR3	0	1.06904			1		0.377964	1.63299	0.377964
EGR4
EHF		1.83829	2.90127	1.92308	2.41209				0.83205
EHMT2
eicosapentenoic acid	-0.00978092	-2.10942	-1.42032	-1.55078	-1.03077		-0.532164	-1.08538	-1.35852	-0.851084
Eif2
EIF2AK2		0.842823	1.68534	0.922242	0.682242
EIF2AK3		1.05427	-0.699672	1.98378	2.57458		2.3845	1.27443	1.09545	1.14373
EIF2AK4		1.18689	0.727607	1.91237	1.02565				0.447214
EIF3A		0.231714	0.231714	-0.339422	-0.339422				-1.21387
EIF3M
EIF4E	3.33219	3.83113	2.42096	2.52427	3.44106				2.18324	0
EIF4F
EIF4G1		2.23607							2
EIF4G2
elastase
ELAVL1	0.957715	-0.369623	0.800725	0.352029			1.14898	0.772049
ELF1
ELF2
ELF3	-0.730409	0.192923	0.192923	0.883452	1.28745		1.9868		1.9799	1.9868
ELF4	-0.468521		-1.7693
ELK1	1.1537	0.80115	0.264263	1.37575	0.899477		1.71115	0.452112	1.45957
ELK3	-1.23091	-0.269191	-2.21565	-0.625768	-1.21387				-0.780869
ELK4		1.2464		1.2464	1.2464
ELL
ellagic acid				-0.447214			0	1
ELOVL2
ELOVL5		0.516825	0.725866	0.11547				-0.339422	-0.915249	-0.915249
embelin	-1.97438		-0.246183	-0.492366
EMD
emodin	-0.710742	-1.70574	-0.552875	-2.35108	-2.5516			-0.5547	-1.06749	-0.128037
EMP2
EMX2			-1.13137
EN1							1.17892	1.17892
EN2
enalapril	0.9558	0.613036	0.66519	0.216574	1.79605		0.145521		0.714286
enalaprilat
ENC1
endosulfan
Endothelin	1.93351	1.08609	-0.723747	1.93351	2.15744
endothelin receptor
endrin
ENG	-0.785136	0.153293	-0.732798	-0.454369	-0.107521		-1.4	-0.522233	-0.522233	-0.730297
ENO1
enoxacin	-0.447214	-0.377964	-0.377964	-1.34164					0
enterotoxin B	2.35886
entinostat	0.722603	1.12656	0.585438	1.69378	1.8767			1.00239	1.55442
ENTPD1
ENTPD2
ENTPD5					1.13137
enzalutamide
enzastaurin
EOMES		-0.839181	-0.452267	-2.54951	-2.06197		1.64485	0.194257		0.923381
Eotaxin
EP300	0.848613	-1.17484	-0.427103	0.119758	0.37142		0.587341	1.14412	2.29147	2.1879
EP400	2.17026	3.53798	4.10126	3.40052	3.86023			3.50045	3.50045	3.58219
EPAS1	2.19403	0.180048	-0.00774445	2.22404	0.433808		1.05293	0.618827	1.10134	1.62682
EPC1
EPHB1	1.9868	1.59	0.492366	1.59	1.59		1.9868		1.9868
EPHB2
EPHB4	0.258199	-1.69775	-1.5	-1.50756	-0.301511		1.88982	1.41421
ephedrine
EPHX2		1.1767
epicatechin	-0.550348	0.147074		0.422043			1.04223	0.76451	1.04223	0.372104
epicatechin gallate	-1.1319	-0.414515	0.270413	-0.784987					0.350931
epigallocatechin-gallate	-0.210852	-0.381612	-0.608999	-1.2572	-2.33648		-1.56213	-2.32352	-1.94789	-2.60478
epinephrine				0.695764	0.257722			1.8932	1.55748	1.68199
eplerenone	-3.09032	-1.1903	-1.26063	-2.06434	-3.08237		-1.87146	-2.02061	-2.57335	-2.57335
EPO	1.15502	-0.520851	-1.1901	0.726958	0.667514		1.48381	0.00830412	1.12919	-0.0693352
epoprostenol		0.32323		1.16518	1.45204				1.10265
EPOR
epothilone B		-1.066	-1.41421	-1.46261	-0.787562					0.128037
epoxomicin		-1.41421
epoxyeicosatrienoic acid
eprosartan		-1.98248
ERBB2	3.29709	3.87261	3.37826	3.86719	4.37564		1.35395	2.58829	3.41979	2.04634
ERBB3	-0.159313	0.434281	-0.153069	-0.215387	0.452267		0.139516	-0.0389545	-0.520344	-1.10896
ERBB4	0.557507	1.13312	0.77415	-0.318223	-0.338062		0.0948566	0.0708288		0.0406558
erbstatin
ERC1
ERCC4
ERCC6
EREG				1.52153	1.19208					2
ERG	0.849695	-0.81865	0.23796	0.852803	0.654654		1.36438	1.21268	0.447214	0.942809
ERK	4.26922	2.80375	1.78378	4.64771	4.64022		2.9432	3.15603	3.43587	3.18337
ERK1/2	2.24047	1.40448	0.18599	1.93318	3.0656		1.72722	2.36399	2.38275	1.42526
erlotinib				-1.94362	-2.18577			-1.9625	-1.9625	-1.94362
ERN1		-1.75792	-0.780628
ERP29	-1.1094	-1.08643		-1.04407	-2.22692
esculetin
ESR1	-0.296219	1.44982	2.72473	1.6229	2.99705		-2.03329	3.18096	3.76211	3.67261
Esr1-Estrogen-Sp1
ESR2	1.38927	-1.32775	-0.289353	-1.30864	-2.2536		0.701493	-0.553944	0.35316	0.0966043
ESRP2
Esrra	-1.76923	-0.142857	-1.74515		0.961074		-1.5	-1.05279	-1.19925	-2.18313
ESRRA	0.750194	-2.3756	-2.69581	-0.0813788	-0.288675		-0.338062	-0.440225	0.415227	-1.31694
ESRRB	0	-1		-0.447214	-1				0
ESRRG	0.488012	-2.61508	-2.79863	-1.6089	-1.23561		-0.652415	-0.862958	0.309847	-0.325715
estradiol benzoate		0.272955		0.914995	0.330584		0.641329		-0.269747	1.3662
estradiol valerate	-1.446
estrogen	1.0501	3.74531	2.98405	4.47994	3.62521		0.811611	2.04183	2.55285	2.23537
estrogen receptor	-1.65906	0.106602	0.226208	-1.4646	-1.64321		-0.496556	-2.13563	-0.303778	-0.848604
etanercept	-1.78317		-2.59617	-1.54898	-2.44949		-2
ethanol	1.00929	0.560959	1.44408	1.8967	2.28819		-0.12334	-1.0593	0.101581	-1.74603
ethidium		-2
ethionine		1.08643	2.06197	2.53837	2.53837				2.2188
ethyl ether
ethyl linoleate
ethyl pyruvate	0.562544			0.640184	-0.447214		-1	-1
ethylene glycol tetraacetic acid	-1.90984	-2.74575		-2.74575	-2.74575
etodolac
etomidate	-1
etoposide		0.198019	0.797488	1.24635	0.403781		0.813143	-0.902986	0.046045	-0.733382
etorphine
ETS		0
ETS1	2.20299	1.08587	1.65107	2.48226	2.49473		1.88169	1.6436	2.94103	2.07827
ETS2	1.75187	1.07124	0.174704	1.99158	2.2065		1.21615	1.79114	2.30923	1.37688
ETV1	1.3838	-1.09184	0.951303		0.294118				0.522233
ETV3
ETV4	1.96754	1.57799	1.40941	2.2411	2.41961		1.15142	2.17152	2.17152	1.85352
ETV5	1.63299	-0.5547	0.562544	2	2			1	0.816497	0.478091
ETV6
eugenol
everolimus		0.664411	-0.112509	-0.725866	-0.287348		1.43208	-0.727607	-1.02565
evodiamine	-2.44949			-2.23607	-2.23607
EWSR1
Ewsr1
exemestane
exenatide	0.417585	-0.168497	-1.57176	-0.168497	-0.691564				-0.152499	-1.446
EYA1										1.19452
ezetimibe			0
EZH2	-0.250181	1.22578	-0.10385	0.0321081	0.934156		2.45964	3.0369	2.44871	2.49044
EZR		-0.493197	0.324443	1.09109			-0.2	0.784465	0.784465	1.62221
F Actin
F10		-1.01794	-2.04348		1.39109		-0.130189	1.13137		1.73205
F2	4.79543	1.66878	2.2257	4.50329	4.22289		3.98749	3.2785	4.46024	3.26907
F2R	1.49809	0.338694	-0.191827	2.08597	1.56546		2.90863	1.98374	2.39551	2.38931
F2RL1		-0.282216	0.196116		1.94145		1.70588	2.41176	2.41176	1.94145
F2RL3
F3	-0.416122	-0.328292	-0.645642	0.8318	0.956183			1.96396	1.96396	1.96396
F7	2.55639	1.70801			2.75624		2.20552		1.9658
FABP1										-0.762493
FABP2		1.30931		1.03923	0.738549
FABP4		0.426401	0	-0.377964	0.447214			0.447214	-0.128037	0.27735
FADD		0.117041	-0.208514	-0.686803	0.412082
FAM103A1
FAM188A
FAM3B
FANCC
farglitazar	-0.5547
farnesol		-0.804984		-1.03923	-1.03923					-1.52753
farnesyl pyrophosphate	0.915249	-0.39582	-0.79873	0.168497	-0.159674			1.446	0.842484	1.446
farnesyltransferase inhibitor
FAS	-0.12907	1.63201	1.19678	-0.595451	-0.433713		-0.602681	-1.25846	-0.605235	-0.917763
Fascin
FASLG		-0.579284			-0.520306
FASN	0.896258			-2				-1.34164	-1.91237
fasudil	-0.759615	0.0980433	-0.0619935	-1.05576	-1.37143		-0.461084	-1.77666	-1.77666	-2.21863
FAT1	1.94878		1.29627				1.94878
fatty acid	0.735365	0.674115	-0.382482	2.16466	1.80552		1.45893	0.324048	-0.123467	0.206486
FBLN2
FBLN5
FBN1		0.242536	-0.518476	-2.2188	-2.21321		-0.848528	-2.42536	-2.42536	-2.42536
FBXO25
FBXO32	1.94625	1.28037		-0.160128			0.415227	0.152499	0.400892	0.493742
FBXW7	-0.232933	-0.108937	-0.442148	0.0559114	0.168505		-1.02565	-0.152499	-0.738549	-1.30931
Fc gamma receptor	1.29651				-0.154119
Fc receptor
FCER1G	2.42536
Fcor		0.810998
Fe2+	-1.38675	-1.19523	-0.128037	-0.27735	-1
FECH
fenamic acid		1.74501	2.50916	3.22064	3.50076		2.24606	1.72774	3.23125	2.59384
fenofibrate	-1.29932	-0.0871835	-2.70599	0.576815	-0.871493		-0.302841	-0.133982	-1.05879	-1.04998
fenoldopam	-1.73205
fenoprofen
fenretinide	-1.99881	-2.32444						-0.245358	-0.985244
FER
FERMT2
ferric nitrilotriacetate
FEV
Fgf	1.87678	0.419142	0.144562	1.54191	1.54191		1.34151	2	1.67522
FGF1	0.717137	3.59984	1.93793	2.02647	2.08048		1.53737	0.50451	1.12063	-0.246183
FGF10	1.9959	0.955582	1.43968	1.46141	1.35318		1.066	2.64575	0.904534	0.904534
FGF13
FGF16
FGF19	-0.725866	1.76282	-0.417633	2.01144	1.52753		0.561644	1.96575	1.81712	1.04021
FGF2	1.82634	1.86592	1.17745	2.89627	3.11804		1.51846	2.08055	2.92239	2.70565
FGF21	-1.34745	-1.97045	-1.84982	-1.5939	-1.21964		-0.820462			-0.619736
FGF3		1					1		2
FGF4		1.49241	1.19523	0.640184	2		0.152499	0	0.640184	0.447214
FGF7	1.12049	0.629376	1.24642	-0.146672	0.762554		1.36282	1.44215	0.307584	-0.927254
FGF8			-0.577086		0.0813788		0.806463	1.44026		0.648022
FGF9		-0.103695	-0.552345	-0.242536			0.650945	0.5547	0.5547	0.970143
Fgfr	0.89448	0.239983		0.89448	1.98248				0.593732
FGFR1	-0.160128	1.88423	0.458585	2.43451	2.43451		1.84895	2.45576	2.61116	2.08893
FGFR2	1.17444	1.75308	2.21782	1.2261	1.30613		-0.911051	-0.782881	-0.692543	-0.196326
FGFR3	-0.5547			0
FGFR4
FGR
FH
FH535
FHIT	-2.80354	-2.80976	-2.6264
FHL2		-2.21315	-1.7804	-1.95962	-1.97438
Fibrin	0	0	-0.447214				-1	-1	-1
filipin
finasteride	2.21321	-0.562544		0.928477	0.522233
fingolimod				-2.44949	-1.88982
fisetin	-2.4327	-1.93733		-2.42536	-2.42536					-1.98248
fish oils	-0.894825		1.91005		0.152499				1.9799
FKBP1A
FKBP1B
FKBP4		-0.978523	0.0394362	-0.197181	-0.22798		0.57735	-0.57735		-0.57735
flavone
FLCN
FLI1	2.46358	1.45685	-0.06712	-0.38155	-0.493427		2.13667	-1.18837	-0.0566298	-0.373275
floxuridine
FLT1	3.27327	1.1767	0.96225	2.52357	1.38675
FLT3
FLT3LG	2.37531	1.84342	2.02244	1.12126	2.09337				1.94737
fluocinolone acetonide	1.21268	-0.534522	-0.942809	0	-1		0.333333		-1.89737	-1.41421
fluoride		0.492366
fluoroquinolone
fluoxetine	1.04761	1.33592		-0.576594	0.478117		0.63446	-0.204154	0.124055	0.00260104
flupenthixol			-0.057639
flutamide				0.58313	-0.637865
fluticasone	-1.22346	-0.931407	-1.45332	0.31959	0.182899		0.196257	-1.18786	-1.11803	-0.571865
fluvastatin	0.527517		-0.104235	-0.573388	-0.407427		1.40294	0.742955	0.320285	0.475446
fluvoxamine
FMR1		-0.705092	0.176666
FN1	4.39795	1.47146	2.61266	3.09693	2.47139		0.37092	1.32543	1.53732	1.57377
FNIP1			1.53209					1.09109
Focal adhesion kinase		0.263158	0.0448561	1.27581	1.52632		-1.1094	1.06715	0.963338	0.630593
folic acid	-0.162081	-0.667142								0.9547
FOLR1
formaldehyde	1.07317	1.2903	0.350489	1.79363	1.91931		1.88982	2	1.66978
formoterol		-1.06715	-0.339422	-1.06715	-0.218218
formylmethylflavin
forskolin	2.49064	0.956918	0.558044	2.30768	1.9036		0.773243	0.147595	0.818728	0.304396
FOS	0.9551	1.28268	1.76626	1.61128	2.07069		0.081992	1.43605	0.506748	0.86764
FOSB	0.421249	-0.192006	-0.548863	0.100251	0.20795		0.882498	-0.0638877	-0.553849
fosinopril
FOSL1				0.432426	0.522429
FOSL2							0.569803
FOXA1	-0.662886	-0.78716	-1.10098	-0.449195	-0.320073		-1.25939	-0.789177	-2.37378	-2.16753
FOXA2	0.466512	-1.04911	-0.621285	-0.294647	-0.212005		0.597458	-0.340503	-0.800641	-0.988847
FOXA3			1.38318
FOXC1	1.66448	-0.0501886	1.7566	0.61017	1.94145		1.38675	1.66448	1.91237	1.46261
FOXC2	1.28494	-0.545207	0.611293	0.499573	1.51545		0.935167	2.09792	1.89995	2.61382
FOXD1
FOXD3
Foxe3
FOXF1	2.44254		0.833235	1.04407	1.04407				1.04407	1.04407
FOXG1			-1.17595				-0.22285	-0.22285	-0.624721	-0.22285
FOXH1
FOXJ1
FOXL2	0.642493			1.98896	0.952544		2.04567		1.84303	0.926981
FOXM1	1.68437	1.7904	2.6508	3.24393	3.89462			3.57942	3.4399	3.53698
FOXO1	1.93638	2.34852	1.53309	3.47478	3.45151		1.23477	1.58771	2.41837	1.05534
FOXO3	0.723585	-1.24445	-1.1789	-0.0916102	0.247243		-0.805621	-1.86871	-2.05161	-2.54163
FOXO4	1.98936	-1.00633	-0.683581	-0.155965	0.482179		0.875419	0.510345	-0.104061	0.811522
FOXP1		-0.927173	-0.927173	-1.9868	-1.9868
FOXP3	-0.127399	-1.10282	-2.22756	-2.68538	-1.45549		-1.25357	-1.70561	-0.57735	6.53198e-17
FRAT1
FREM1
FREM2
FRK
FRMD6
FRS2
FSH	1.54889	-0.337488	0.505107	0.361364	0.359748		1.46682	1.15232	2.13964	1.40666
FSHB	0.617876						1.45204		1.80038	1.08197
FSHR					1.91127		0.860972	0.930964	0.426401	1.2985
FST				-0.768559					0.223999	0.0620442
fulvestrant	-0.549972	-3.81833	-2.77263	-3.99608	-3.28373		-2.61448	-4.3379	-4.04197	-3.40532
fumonisin B1	0.727607
FURIN		1
furosemide
FUT8		0.377964			-0.447214
FYN							-0.992583	-0.727825
FZD8	1.40841	2.77161	3	2.12132	1.1767		0	0.956183	1.40841	1.40841
FZR1			0.152499	1.06749
G protein alphai
G6PC
G6PC3
G6PD
GAB2	1.88423	0.486854		1.93061	1.36556			2	2.41176
GABA	0.128037			0.128037	0.128037		-1.34164	-0.447214	0.128037	-0.447214
gabapentin
GABARAP
GABPA		0	0.479022	0.152499	0.152499				1.96865	1.96865
GABPB1			0.467606
GABRA1
GABRG2
GADD45A					-0.807573
GAL3ST1	-0.974695	0.561644	-0.492366	-1.13137	-9.42055e-17			0.492366	0.492366	0.492366
gallic acid					-1.9799		-0.848528		-1.9799
gallium nitrate	-1
GALNT6
gambogic acid	-1.63299	-2.44949	-1.63299	-2.44949	-2.44949
gamma tocopherol
gamma-linolenic acid		1.88982	1.13389	1.63299	1.63299		1	1	1.34164	1
ganetespib
ganglioside GD1a
ganglioside GM1			1
Gap
GAPDH		-1.93449
garcinol					2.12132
GAS6	2.19531		2.19531	1.97246	2.41234
GAST	2.9047	2.41667	-0.109349	1.97985	1.80175		2.55249
GATA1	2.11231	0.367372	-0.755211	-0.00169064	1.2861		0.229081	0.786334	1.6296	0.696441
GATA2	1.65761	-0.0717035		-0.565442	1.0038
GATA3	0.777452	0.236996		-0.571086	0.0650986		-1.99323			-0.414214
GATA4	1.31395	-2.87161	-3.25221	-0.863424	-0.494569		-0.3722	-1.95828	-0.618603	-0.734693
GATA5			-2					-1
GATA6	-0.922822	-2.72286	-1.06945	-0.95906	-0.17784		-1.26324	-1.1261	-1.08841	-0.940678
GBX2
GC
GCG	0.966553	-1.2707	-1.96864	1.42681	0.661215		0.490716			0
Gcg
GC-GCR dimer	2.2188			1.98248
GCGR				-1.4			-1.34164	-1.09109		-1.4
GCK		1.76505	2.359	0.390567			0.848528			-0.242536
GDC-0941
GDF11
GDF15		1.96396
GDF2	2.27882	0.476302	1.57512	1.25898	1.43941				1.52128	2.38632
GDF5
GDF9	0.4634	0.807721	1.94596	0.835853	1.00137		0.722914	0.786626	0.736544	1.2854
GDNF	1.75442	2.15647		2.36777	1.74309		1.12679	0.834714		0.75649
gefitinib	-2.10743	-0.829401	-1.82916	-1.11945	-1.63611		-1.00904	-1.97021	-1.97021	-1.97021
gelatinase
geldanamycin	-2.30266	0.725262	-0.398281		-1.85754
gemcitabine	0.286691	-0.150142	1.38943	1.05584	1.11361		0.562544	0.208783	1.317	1.38621
gemfibrozil		-0.634528	-2.9501	0.244329
genistein (phytoestrogen)	-0.311489	3.9952	1.38642	2.41511	1.40387		0.903976	-0.9817	-0.578868	-1.189
gentamicin	2.387	3.96434	2.65373	2.87209	2.29505		3.30748	2.4004	2.41404	0.685994
gentamicin C		1.5	1.78885	2.67261	3.20713		1.89737		2.52982	2.12132
geraniol
geranylgeraniol
geranylgeranyl pyrophosphate		-0.326023	-0.0448561	0.156174	-0.185695			-0.2		-0.2
GFI1	-3.4702	-1.82811	-2.33677	-0.88198	-1.7942
GFI1B	-1.99585
GFPT1	1.1094						-9.42055e-17			0.152499
GFRA2
GH1	0.673919	0.451964	-1.15574	1.6021	1.77057		0.992793	-1.1442	-0.901089	-0.422923
GHR				-0.6	1
ghrelin
GHRH									1.60885	1.46056
GHRHR
GHRL	-0.39762	0.136268	0.62353	0.448866	0.215387			0.389833	0.182122	1.66091
Ginkgo biloba			-1
ginsenoside Rg1
ginsenoside Rh2
GIT1		-1.06749
GJA1			-0.181362	0.574992				-1.95962
GJA3
glabridin
glemanserin
GLI1	1.20592	0.782411	2.247	2.98862	2.61747		0.675734	1.36158	2.1735	1.81651
GLI2		-1.01871			-0.573382				2.41678	2.00832
GLI3	-0.659126		-0.730153		-0.2		0.152499			0.816497
gliclazide
GLIPR2
GLIS2		-2.23607	-2	-2.23607	-2.64575		-1	-2.44949	-2.64575	-2.44949
GLP-1-(7-34)-amide	0.739104	-0.0734223	-1.31995	-0.42785				0.27735		0
glucagon	-0.901764	-1.11378	-2.1804	0.57735	-0.101535		-1.01419		-7.18311e-17	1.1767
glucocorticoid	2.72154	0.460054	0.560527	0.310463	-0.0347184		0.41432	-0.228986	-0.123661	0.0896733
glucosamine		2.01246	0.901867
glucuronyl glucosamine glycan sulfate
glutamine	-2.03258	-1.49174	-1.79301	-0.879306	-0.554879		-0.364612	-1.45676	-1.48596	-0.919567
glutathione								-1.15434	-1.39365	-1.01865
glutathione ethyl ester
glyburide	-0.509175	-0.509175		-0.156174			-1	0	-0.156174
glycerol	0.727607	-0.569803	0.307794	-0.242536	-0.152499			-0.152499		0.27735
glycine	0.21779	0.411765	0.452792	0.738549	0.539099			-0.254457	0.156174
Gm15807/Hmgn5		1.41421		2
Gm-csf	2.19089	1.8391		2.18901	2.18901				1.99191
GMNN		1.60591	1.41421
GNA12	3.05447	1.41791	1.92439	1.93538	2.23607		1.55406	1.02565	-0.282216	0.588348
GNA13	1.9897	1.05361	0.654654	1.9897	1.9897				1.9897
GNA15
GNAI1
GNAQ	1.93695	0.376663	-1.26857	1.16462	1.16462		-0.152499	-0.242536	0.193182	-1.25357
GNAS	-0.53581	-1.50859	-2.00959	-0.78156	-0.861156		-0.900366	-1.96895	-1.40214	0
GNB1
GNB2
GNB2L1		0.503066		0.503066	0.179964
GNB3	0.735824	-0.970143	-0.842484
GNB5
GNE
GNG13
GNL3				-0.970143
GNMT
GNPAT
GNRH				2.08944	1.87168
GnRH analog	-0.306786	-1.85355	0.372721	-0.862831	-0.185296			-0.353553	0.308607	0.288675
GNRH1	1.1886	0.178945	-0.683476	0.720985	0.448423		2.11453	1.77726	1.86716	1.11737
GnRH-A	1.41667	0.931911	-1.31182	2.58644	2.73232		1.13363	-0.760353		-0.594675
Go 6976	-2.95234	-0.531564	-1.38924	-2.38526	-3.08		-2.37685	-2.38231	-1.05379	-1.34276
Go6983	-1.6283	0	-0.594089	-0.933257	-0.594089		-0.650945	-1.9868	-1.55543	-1.73205
goserelin
gossypol	-1.63299
GPAM
GPBP1
GPC1	6.08094e-17	0.54886	0.0734223	0.305505	0.54886		0.617822	1.96396	1.05393	1.71957
Gpcr
GPD1
GPER1	1.92332			1.49067	1.72711
GPI		0.221082	1.27459							1.06412
GPNMB
GPR119
GPR34
GPR68
GPS1
GPS2
GPX1	-2.61861	-0.266207	-0.162221				-1.30931	-1.9868		-2.21565
grape seed extract		-0.866025	-0.640184	-1.06749	-2.19089
GRB10
GRB2								-1.88982	-1.66667	-1.88982
green tea polyphenol	-1.4421	0.493657	-0.112867	0.176471	-0.707107		-0.816497	-0.452792	-0.123091	-0.452792
GREM1		-0.593732
GRHL2		-0.426401	0.213201	-1.13389	-0.377964			2
GRIA1
GRIA2
GRIN1
GRIN2B
GRIP1
griseofulvin
GRM2
GRM3
GRM5	1.96865	1.15404
GRM7
GRN		-0.882498	-0.882498
Growth hormone	2.24475	-0.423641	-0.930723	0.539436	0.9705		1.5096	0.0637577	-0.103308	-0.365949
GRP		1.90495	0.302364	1.45394	2.75285		1.96575	1.9924	2.55363	2.39056
GRPR
GSC	0	-1	0.152499
GSK0660
Gsk3	1.03396		2.79787	-0.315637	-0.609312
GSK3A		-1.06749
GSK3B	0.321101	-0.17445	1.95928	-0.0613036	0.742845		0.771186	-0.0843649	-0.327144	0.602021
GSK690693	2
GSTA4
GTF2F2
GTF2H4
GTF2I					-0.739425
GTF2IRD1					-0.213201		2.19036
GTF3A
GTP
guanidinopropionic acid	-1.71053	-2.11451	-4.09891
GUSB
GW 4064					-1.77015
GW 5074		-0.927173	-0.927173	-0.927173
GW3965	0.298768	0.200876	0.187418	0.0833006	-0.264286		0.497142	-0.320423	-0.0265307	-0.308628
GW501516		-0.785596	-0.673805	0.496828	-1.06901			-2.10533	-1.37247	-2.21744
GW7647	1.02565	-0.784465	-1.12858	-1.74416	-1.50966		-0.896258
GW9662	-0.833798	-0.44514	-0.10388	-0.107647	1.32014		0.407169	1.15108	0.662923	1.59828
H2AFB3 (includes others)	-0.83205				-0.27735					1
H2AFY	0.196116	-0.632456		-2.13683	-1.26491		-1.66448		-1.76505	-0.923381
H-7	-1.86991	-0.99786	0.270636	-1.6584	-0.844319		-2.80365		-0.404841
H89	-2.79848	-0.261818	0.432015	-1.46168	-1.8634		-0.234558	0.139277	-0.426774	0.437162
halofuginone	0.393159	-0.342791	-1.50111	-2.21565	-2.42487			-2.21565	-2.42487	-2.21565
haloperidol	-0.554029	-0.644266	-2.59785	-0.261524	-0.185241		-0.993946	-0.542894	-0.471636
HAMP
HAND1		1.91237			0.478091
HAND2		-2.17071	-2.27212	-1.67536	-1.43435		-0.319619	-1.95429	-1.95429	-1.78804
harmine		0		-0.816497	-0.816497		1	0	-1.34164	-0.447214
harmol								-2	-2
HAS1
Hat
Hbb-b1		2.9673	2.61116	2.7136	3.4641				1.88982	1.88982
Hbb-b2		2.82843	2.44949	2.7136	3.4641				1.88982	1.88982
HBEGF	2.17258	1.066	0.411706	1.46261	2.44949		2.2188	2.44949	2.4327	2.23607
HCAR1
HCAR2		-1.88982		-1.88982	-1.41421		-1.34164	-1.63299	-1.63299	-1.63299
HCRT
Hdac	1.75959	-0.0334844	3.11128	-1.34258	-0.543224		-0.385253	1.88348	1.03395	1.15416
HDAC1	-1.4601	-1.97446	-0.459929	-2.18459	-2.18459		-0.192032	-2.00254	-2.05369	-1.90758
HDAC10										-0.392232
HDAC2	-1.05045	-0.460348	-0.510343	-0.889001	-0.735767		1.05792	-0.895167	-1.29099	-1.18733
HDAC3	-0.389893	-0.624543	-0.80006	-0.685994	-1.10369		0.646997	-0.664411	-1.2888	-0.976092
HDAC4	-1.85934	-1.56709	-1.28103	-1.58424	-1.02565		-0.218218	-0.518476	-0.57735	-0.718185
HDAC5	-0.355479	-0.0416305	1.77739	-1.05393	-0.562544		1.63299	1.34164	1.34164	0.377964
HDAC6	1.13674	0.538672	0.990148	0.970143	0.50736			0.492366	0.970143	0.970143
HDAC7	-0.14834		-0.358621
HDAC9
HDC	1.92916	2	1.92916	2	2
HDGF
HDL		1.2662	0.584325	1.45739	1.56476		1.32324	0.320941	0.956977	0.895195
Hedgehog		-0.313993	-0.4502	0.522233	0.684211		-0.050702	0		0.923381
helenalin										-1.9799
heme	-0.136214	0.836872		1.4137	1.90671		1.67006	1.90671	2.13965	1.90671
hemin				0.0133112			-0.377442
hemozoin		1.94099	2.58799	1.94099	2.58799
heparin		-2.0419	-2.89139	-1.46544	-1.37213		1.11688	-1.18818	-1.18818	-1.47292
herbimycin	-2.38278	-0.337512		-0.63208	-1.46783		-1.54393	-2.38235	-2.76268	-2.38235
heroin
HES1				-1.55496	-1.1431			-0.445021	0.239182	-0.900686
HES3
HES7
hesperetin		-2	-2
hesperidin
hexachlorobenzene		1.40452	2.45652	3.72857	3.59211		1.94257	2.15455	3.30237	3
hexamethoxyflavone		0.339422
hexamethylene bisacetamide	-1.80839	-1.83195	-1.51933	-1.4627
hexanoic acid
HEXIM1				-0.132453	-0.132453
HEY1		0.627143			0.896258		-0.440086
HEY2		1.36489	1.79776	0.480637			-0.274552		-0.727677
HEYL
HFE2
HGF	4.83615	3.09076	4.22592	5.50299	5.15402		2.59386	5.00631	5.35502	3.78778
HGS
HHEX		0.516318
HIC1	-1.39688	-0.22097	-0.248655	-2.51531			-0.137361	0.620174	1.42491	0.447214
HIF1A	4.40519	1.0827	1.02681	2.0277	2.36697		1.84984	0.546488	2.03763	2.55947
HIF3A		0.467606	1.1319	0.467606	-0.650945			-0.561644	-1.16518
HIPK2	1.96875	2.61116	1.36895	0.569652	1.26491
Hist1h1a	2.44949	2.26779	1.91485	2.06474	2.32379		1.29099	1.80739	2.82843	2.68328
HIST1H1A
HIST1H1T	2.44949	2.26779	1.91485	2.06474	2.32379		1.29099	1.80739	2.82843	2.68328
HIST2H4A
histamine	0.277562				1.98932		0.698198	0.422478
histidinol		1.09109
HISTONE
histone deacetylase		-1.49241			-1.63299		-1.63299			-0.447214
Histone h3	1.9799		-0.762493	0.282843
Histone h4
HIVEP2
HLF
HLX		-1.45999	-0.345547	-1.8783	-1.8783		-1.98248
HMGA1	0.653504	0.790141	0.72298	2.06836	1.72831		1.38941	1.51886	1.53052	1.71831
HMGA2				1.96865	1.15404
HMGB1	1.7757
HMGCR
HMGN1					-0.152499
Hmgn3
HMOX1	0.247688	0.437746	0.0228702	0.257084	-0.572889			-0.165484	-1.46785	-0.15765
HMX2
HNF1A	2.18768	0.578522	1.24393	1.33958	1.31013		-0.296395	-2.2188	-0.149025	-0.609712
HNF1B	-1.75612	0.481459	0.870457	-0.283565	-1.07049		1.61615	-0.896258	-0.856565	-0.361158
Hnf3
HNF4A	-0.0501885	-0.236517	-0.398437	-0.414405	-0.855955		-1.05834	-2.53838	-1.37936	-0.284871
HNF4α dimer			0.917303				-0.467606	-1.20593	-0.900366	0.234887
HNRNPA2B1
HNRNPAB	1	-0.624695	-0.624695
HNRNPK		0.403992	-0.700753	0.403992	0.712677			0.970143	0.215666	0.569803
Ho
homocysteine	0.509265	0.797872	0.228362	1.07069	0.996241		-0.27127	0.501544	1.15306e-16	-1.04052
honokiol	0.493197	0.156174	-1.21854	-0.522233	0.174078				-0.6
hormone		0	0	0
HOXA10	-0.202516	-1.03422	0.182088	-0.840361	-0.254658		-0.581318	-1.03479	-0.485714	-1.34693
HOXA11		-1.38675		-1.06749						-0.152499
HOXA13	-1.96861
HOXA2		-1.13137
HOXA5		0.339422
HOXA7	0.533465
HOXA9	-0.87077	-0.62846	0.0799414	-0.230909	0.527703		-0.447214	0.707107		-0.971286
HOXB1
HOXB13			-0.101535	-1.066	-0.478091
HOXB4			-1.34164	0	1
HOXB5	-0.6	-0.928477	-1	-1.09109	-0.6		0.0588235		0.928477	0
HOXB7
HOXB9
HOXC11
HOXC6		-0.904534	-0.301511				-1.13389
HOXC8	0.632456		0.359211	0	-1.41421
HOXC9			0.447214
HOXD3	1.71957	0.852803	0.649722	2.15811	2.13201			1	1.29987	1.80839
HOXD4
HOXD8			-1.99321
HPSE
HR					1.63299			1.13389	0.870388	-0.522233
HRAS	1.39264	2.32793	2.15772	2.33665	2.56905		3.28352	2.17396	2.54046	0.841057
HRG				2			1.96396	1
Hrg
HSD11B1			0.792118	-1.30931	-0.650945
HSD17B4					0.27735
HSF1	1.1739	-0.494388	0.974379	-0.508501	-0.0758798		1.88853
Hsp70		1.96865	2.15555
Hsp90		2.20825	2.0772	2.79977	2.78861		1.78208			1.96931
HSP90AA1		-0.195309
HSPA5				-0.218218
HSPA9		-1.92916	-0.112509	-0.727607	-0.896258		1.38675	0.640184	-0.478091	0.27735
HSPD1	2.41926
Hspg
HTATIP2
HTR2A			1.92741
HTR2B
HTR2C	1
HTR3A
HTT	0.704269	1.03221	1.77588	1.85144	2.61937		0.231317	1.9484	1.43274	0.547002
hyaluronic acid	2.25638	0.613891	1.77961	1.59639	1.80061		-0.0527943	-0.0156922	-0.0725553	-0.200475
hydrocortisone	-0.87674	-1.37064	-1.76031	-0.724947	-1.01413		0.189358	-0.771389	-0.0531793	-0.361088
hydrogen peroxide	3.58996	2.49026	1.59487	4.06508	3.98283		3.23805	0.948277	2.18327	0.550449
hydrogen sulfide	2
hydroxyflutamide			1
hydroxypropyl-beta-cyclodextrin		-2.15728	-0.613771	-0.956183	-1.40841
hydroxyurea	0.569652	2.58465	2.29253	2.05548	2.3985			1.33808	1.8122	0.703041
hymecromone	2	1.34164	1.63299
hyodeoxycholic acid
I kappa b kinase	1.07349	-1.28745		-1.28745	-0.927173			-1.9868	-1.9868
ibotenic acid
IBSP
ibuprofen	-1.79124	1.01879	0.945487	1.64444	1.09109		-1.11285	-0.641913	-0.179352	0.167097
ICAM1				1.96396	1.9799				1.9868
ICMT
Id
ID1		0.601582		1.91579	1.37327		-0.310172	1.38813	1.29325	2.02076
ID2	0.525226	-0.066965	-0.326221	0.220564	-0.430775		-1.40841	-2.84019	-2.4327	-0.496704
ID3	-0.240772	-1.88025	-1.59111	-0.805452	-1.53876		-2.82256	-2.06616	-2.26112	-1.59071
idazoxan
IDH1
IDH2
ifenprodil			-1.98248
IFI16					1.1767
IFI30
IFIH1			1.98248	2.2188	2.2188
Ifn	0.717514		2.93357	1.73143	2.88296			2.56273	3.36269	2.606
IFN alpha/beta	1.82073		1.87317	1.85421	2.94584			2.13201	2.70426	2.77161
IFN Beta		2.21671		2.20188	1.82386
Ifn gamma	1.86754	2.78826		2.49705	3.19829		1.03995
IFN type 1		-1.99644
IFNA1/IFNA13			1.84723
IFNA2	1.84302	2.99266	3.1945	2.94328	3.12835		1.14022
Ifnar			2.17663					1.88982	2.34261	2.53421
IFNAR1			1.95354	1.40732
IFNB1	-1.32923	-1.41301		-0.353219	0.0419611		-2.07314		-1.85524	-1.41696
IFNE		0.365148
IFNG	3.65499	5.42263	4.40089	6.07668	5.78933		4.4757	2.98558	3.70422	2.26682
IFNL1			2.36429	2.12977
IFNL2		1.13137	1.9799
IFNLR1
IFRD1	0.991837	-0.862044	0.585369	-1.74574	-0.990148		-2		-1.9799
IFT57			2.17832	0.390567
IGBP1
Igf
IGF1	4.25331	2.82995	1.79035	3.75066	4.9515		1.52948	2.12768	2.02462	1.76586
IGF1R	0.56913	0.300906	-2.18199	0.71402	2.0971		0.91757	-0.187066	0.547428	-1.45663
IGF2	1.20472	1.09372	0.190261	0.718241	0.279544		-0.593336	1.22957	1.35698	1.9302
IGF2BP1		0.877338	1.71791	2.82843	2.13683		-0.239046	2.82843	3	1.94257
IGFBP1	-1.96865
IGFBP2	-0.317208	0.313112	2.29528	2.44949	1.95959		-1.36548	1.52053	2.02503	2.12289
IGFBP4			0.152499
IGFBP5	1.1547	0.27735	0.640184		1.20605
IGFBP7		0.447214	-0.821995	0	-0.377964		1	-0.447214	-0.928477	-1
IgG		-1.19015	-2.12078	-1.05475	-1.28773		0.049171	-0.161257	-0.644484	-0.180688
IGHM				1.88562
Igkv1-117
Igm	-0.188877	-0.307698		-0.307698	-0.335995
IHH	-0.478091		0.0489702
Ikb									1.70958
IKBKAP		-1	-1.34164
IKBKB	2.6603	0.0402916	1.13414	2.9204	3.64155		1.05771	2.06643	2.02908	3.12296
IKBKG	1.78143	0.171812	0.467077	1.91909	1.96957		0.377964	2.12132	2.34875	1.95531
IKK (complex)	-2	-2
IKZF1	1.23812	0.853282	1.15089	0.341557	-0.105692		0.725199	0.382188	0.431331	0.681554
IL1	2.4804	1.40552	1.91378	3.09036	4.02864		2.1762	2.69277	2.59458	2.59735
IL10	2.21297	2.12668		1.29885	0.84647		0.68747	0.437784	0.576769	-0.147606
IL10RA	-2.05125	-2.10346	-3.28633	-0.712507	-0.417585		-1.96382	-0.142857	0.350823	0.892644
IL11	2.37103
IL12 (complex)		2.14625	1.8292	1.79191	3.00322		2.14836	1.24711	1.68004
IL12 (family)	1.84192							1.97697
IL12B				2.30302	2.58154		2.42536	1.9799	1.93733
IL13	2.11247	1.26038	1.70916	2.70174	2.92098		2.15382	3.38887	3.47612	3.01208
IL15	2.34835	0.756742	1.33812	2.59101	3.75658					1.26655
IL17A		0.21959		0.864236	1.77313		2.22151
IL17RA	2		2
IL18	2.06711	1.86233		2.45504	3.4777		1.99328		1.86554	2.76246
IL19		1.71957	1.71957	2.41404	2.41404		0.882498	1.19452	1.19452	1.19452
IL1A	3.26231	2.08267	2.96702	3.43678	4.06979		2.49242	2.31695	2.85313	2.79646
IL1B	4.29908	3.35098	3.22143	4.48858	5.50011		4.45574	2.52354	3.79745	3.24539
IL1R1	2.41678			2.37468	2.75207			1.95083	2.38956	1.95083
IL1RN	-1.78561	-1.01323	-1.9385	-1.90743	-2.63215
IL2	3.14317	3.40892	2.98941	3.46423	3.71401		2.76025	1.28825	1.965	2.47248
IL21	3.38493	2.28774		2.12129	2.71147			2.48196	1.7938	2.73537
IL24										0.478283
IL27				2.79134	2.76867
IL-2R
IL2RG		0.452911							0.137361	-0.632456
Il3	2.46845	2.31482		2.90896	3.22256
IL3	4.28873	3.17355	1.32117	3.16755	3.55549		2.96402		2.31095	1.18111
IL31		-2.44949	-1.70561	-1.066	-1.46261
IL32				1.03426	1.99257
IL33				1.27971	1.39325
IL4	3.54736	1.97482	2.61937	3.00411	1.94733		2.63487	3.61767	3.72751	2.13249
IL5	5.34808	4.4947	3.26356	3.57262	3.19796		2.99261	2.8944	3.76363	3.50213
IL6	4.72172	2.41788	2.80534	4.21928	5.0898		3.78479	3.02363	4.64381	3.12449
IL6R	2.41688	1.16006	2.01662	2.18659	2.5698		0.81631	2.29661	2.93535	2.14166
IL6ST	2.53837			1.96116			1.80748
IL7	2.33605	0.838779		1.05211	0.806676		0.310658
IL7R					2.21321
Il8r	1.9799
IL9		1.95083
ILK		-0.335689			1.97252			1.97252	2.40983	1.24009
ilomastat	-1.7085
imatinib		-1.61895	-0.843344	-0.724327	-0.212026		-0.0229893	0.119677	-0.558967	-0.074227
imidapril
imipramine	-1.51951	-0.0723575	-0.0723575	-0.0723575	-0.926367			-0.210526		-0.0842152
imiquimod			1.85326	2.77236	2.94069			2.18365	2.01655	2.59177
Immunoglobulin		-0.308423		-0.60137	-0.919152				-0.608692
imperatorin
incyclinide
IND S1			0.57735							0.816497
IND S7			0.27735							0
indican	-0.456318	-0.921635	-0.921635	-0.27735	-1.25357		-0.94299	-1.06749	-1.38675	-1.98248
indirubin		-2	-0.377964
indole-3-carbinol	-1.9625				-2.21863
indomethacin	-1.31524	1.09012	0.895996	0.782045	0.64807		1.25884	-0.957861	-0.305593	-0.625672
infliximab	-1.94145		-0.632456	-2	-2.5		-3.45027	-2.7196	-1.58526	-1.55406
ingenol mebutate
INHA	-0.957605	0.130752	-1.01077	-1.54537	-0.789946		-0.361415	-2.51675	-2.87096	-2.79062
INHBA	2.03714	0.0667068	0.80308	0.291385	1.10569		0.531239	0.529745	0.891434
INHBB	0.650945						0.282843	0.152499	0.152499	0.282843
inosine	1.64286	3.21278	2.71956	3.48218	4.0509		2.24166	1.73412	2.58761	2.41876
INS	1.8814	0.413839	-0.602511	-0.540829	0.275703		-0.893716	-1.29793	-0.507353	-0.0770656
Ins1	0.484438	0.484165	1.2593	1.63538	2.57659		0.223314	-0.202419	1.14136	0.00792552
INSIG1	-0.850182	-2.50314	-2.98892	-2.59479	-3.18097		-1.26491	-0.591722	-1.67827	-1.75384
INSIG2	-2.18275	-0.721662	-1.08249	0.056299	-1.96396				0.421521
INSR	-0.558298	-1.69988	-4.80191	-0.920358	-0.769492		-0.317165	-3.24523	-2.40582	-3.60099
Insulin	1.86264	1.29677	-0.275689	1.02199	0.834958		0.810792	0.583226	0.782496	0.287546
insulin glargine
Integrin		1.57676	0.105118	1.57676	2.20128		1.21847	1.97697	2.20128
Integrinα					-2
Interferon alpha		1.26258	2.93718	3.0016	3.38351		2.45893			2.10838
interferon beta-1a		0.83054
INTERLEUKIN
iodixanol
ionomycin	3.02004	1.76663	1.47775	1.4824	3.2948		-0.522921	0.779353	0.770112	0.610533
IPMK	2.33874	0.492366	-1.0158	2.4004	1.673			2.23607	2.4004
IRAK3		0.749064	1.0666	1.25289	0.749064
IRAK4	1.67153	0.633581	0.048737	1.11144	1.18519
irbesartan	-0.307794	-0.664411							-1.88982	-0.727607
IREB2			2.19977
IRF1		1.82075	2.2875	2.55212	3.47869		1.9579	2.99928	2.83691	2.65849
IRF2		0.496334	0.32021	0.185413	-0.28368
IRF4	-2.17855	-2.70772	-2.34008	-2.4592	-2.03635		0.344849	-0.68564	-1.14457	0.0970213
IRF5			1.93793
IRF6	1.89114	1.36338		1.7931	2.7913		1.30931	2.2	1.81987	2.20366
IRF7		2.43263	3.45491	3.99185				1.9489	1.7907
IRF8		0.947696		1.13734	2.40187		1.55748			0.883389
Irgm1		-3.98756	-3.86023	-3.20831	-3.98756			-3.30237	-3.45027	-3.59211
iron		-0.303791		-0.245702	0.0312396			0.533114	0.141579	0.919665
IRS
IRS1	1.04924	1.63807	0.50287	0.435408	1.12027		0.198961	0.183024	-0.375475	-1.14937
IRS2	0.779191	1.544	0.847626	1.68038	1.22517		-0.293561	-0.225282	-0.777221	-1.1162
Irs3
Irs4
ISL1							1.75038	1.14459	1.76141	0.317208
isobutylmethylxanthine	1.81509	0.52228	1.83142	1.56995	1.2703		0.057787	-0.0548821	-1.10092	-1.03469
isoflavone
isoliquiritigenin	-0.842484	-0.0538382		-1.02889	-1.98052		-0.958315	-1.49137	-1.49137	-1.49137
isoprenaline					0		-1.09109	-1.09109	0
isoproterenol	2.40101	0.935259	0.539136	3.33068	3.50329		1.92415	1.42731	1.44188	1.23609
isoquercitrin	0.478091	2.42536	1.66448	2.2188	2.2188
isotretinoin			0.252123	0.745908	0.138335		0.759548	-0.635592	-0.806532	-0.284463
ITGA1	-1.58275			-0.113961				0.569803	0.512989	0.862662
ITGA2	1.9799			1.98248						1.43208
ITGA3	2.17095	1.08981	2.17095	1.92741	1.28571		0.770943	2.17095	2.17095	1.84017
ITGA4	-0.447214		-0.447214	1.09109	1.96396		-1.09109		1.09109
ITGA5	1.52991	0.0749974	2.34864	1.77251	2.15339		0.727607	2.18282	2.16784	1.94099
ITGA6							0.850534	1.96248	1.96248	1.96248
ITGAM	1.95962
ITGAV	1.98291	2.02088	2.31726	2.98865	3.0612		0.0773138	1.94168	2.41561	2.22723
ITGB1	1.03048	-0.156647	0.123181	0.320395	0.491051		1.94799		-0.213586	-0.0752056
ITGB1BP1		-1.97566
ITGB2		0.748454						1.52875
ITGB3	1.35989	2.63128	2.35178	2.48984	2.89331		0.280847	1.57191	2.13297	1.49917
ITGB4
ITGB6		0.177113		2.18661	1.94766		0.666016	1.94766	2.18661	2.18661
ITIH1	0.569803	0.896258		0.447214	0.152499
ITK	2.42811				1.59425		0.658505
ITPR1	0.5547	0.5547	-0.27735	0.152499	-0.27735
ITPR2								0
ITPR3
JAG1		0.474579	0.426401	1.66448			0.128037		0.727607
JAG2		-2.59554	-2.44949
JAK	-0.485071		-0.956183		-0.911322
JAK inhibitor I				0
JAK1			2.80365	1.88982	2.42536				1.98248	2.2188
JAK2	1.95106	1.77083	2.17556	2.32475	2.86484		1.71312	2.30885	3.17299	2.32278
jasplakinolide
JINK1/2							1.38675			1.43208
JMJD6
Jnk	2.20593	2.7072	1.81528	4.02722	5.42609		2.90641	2.48553	3.34515	2.47497
JTV519
JUN	1.15931	1.05491	1.46418	2.25414	3.30334		1.11471	2.14713	1.42331	0.964298
JUN/JUNB/JUND	0.927173
JUNB	1.37048	1.39845	0.06689	2.42129	2.44804		1.81641	0.773166	1.60357	0.726421
JUND	-0.162221	0.893011	0.123613	1.31143	0.646997		0.0439799	-1.33062	-1.33062
K+		1.95264		1.83383				0.322998
K-252	-2				-2			-0.27735	0.650945	-0.239046
kaempferol	-0.896258	-0.896258	-1.19523	-0.896258	-1.38675			-1.98248	-1.98248	-1.98248
kainic acid	2.07604	1.15257	0.0238082	1.73548	2.83682		1.97928	0.716627	1.0908	0.833151
Kallikrein
karenitecin
KAT2B					0.178965
KAT5		-0.220564	0.0731272	-0.737309	0.718421
KCNE3
KCNIP2
KCNIP3	-0.943042		1.09109				0.501557		-0.344881
KCNJ11			-2
KCNJ2
KCNK9	-3.13222				-2.35975
KCNQ4
KCTD11
KDM2B
KDM3A
KDM4C
KDM5A					0.848528
KDM5B	1.279	-2.10989	-1.73445	-2.77095	-1.45372		-0.597328	-2.78373	-3.05783	-3.21077
KDM8			-2
KDR	-0.524142	-0.215666	-0.478913	0.130189	0.797724		-0.103695	0.130189	1.02565	0.239046
KEAP1	-0.161515	0.58788	-0.135665	0.153695	0.153695		-0.775515	0.411765	0.485071	-0.0532246
ketamine	0.514069	0.204084	-0.183639	-0.134439	0.388567		0.744034	1.52017	0.384565	1.12807
ketoconazole	-1.98248
KHSRP
Ki16425
KIAA1524	-0.117041	0.75518	0.270604	-1.38566	-0.606977		-0.149071	0	-0.57735	-0.335673
KIF3A
KISS1R		-0.377964	-0.377964		-0.371391			0	0
KIT
KITLG	4.46586	3.18075	2.94022	3.12745	3.87607		2.80878	2.53234	3.46846	2.47136
KL								-1.96895	-2.20362	-1.97246
KLB
KLF1			-0.0672673	-0.51465	-0.51465
KLF10	-0.682486
KLF11	-1.94029	-1.78227	-1.78227	-1.48149	-1.72532				0.11547	-0.727607
KLF15		-2.97696	-2.98758		-2.20385				-0.15016	0.675113
Klf16
KLF2	-1.70149	-0.672838	0.265425	-0.755027	-0.727731		-0.946317	-1.10469	-1.14771	-0.90408
KLF4		-1.31234	-0.802464	-1.11128	-0.723089		2.371	2.03524	1.69053	2.3145
KLF5		1.48869	1.68506	2.74826	2.90802			2.27749	2.80131	1.43643
KLF6	2.01167	1.6522	2.4135	1.00159	1.64498		1.12351	1.68633	1.28116	1.48928
KLF9			1.49004		0.669364		-0.109618	0.480384	1.12325	1.34164
KLK4
KLRC4-KLRK1/KLRK1									0.2	0.2
KMT2A			1.1212		0.695764
KMT2D		1.71623	1.05859	3.80132	2.93285		-1.52543	0.51465	1.32026	2.37595
KMT2E
KN 93	-1.75611			-1.78208	-2.42487
KN-62								0.27735
KNG1				2.38444	1.79165			2.58548	2.77203	2.58548
KP-SD-1
KRAS	1.16797	2.2884	1.4739	1.10706	-0.0395749		2.01889	0.0710072	0.725243	0.241598
KRIT1
KRT14
KRT17					2
KRT5
KT5720	-1.38675	0.27735		-0.5547	-1.06749
KT5823	-1.51283	-1.97246	-1.28534	-1.97246	-1.18792
L1CAM		0.816497
L-685,458	-8.07806e-17		0.880893
l9Rl3
lactacystin	1.18284	-1.03676	-0.259332	-1.34887	-0.65433		-0.486252	1.21919	1.53268	-1.03697
lactic acid		0.5547	0.896258	0	0		0.762493	0.342997	1.71499	0.342997
LAMA1
LAMA2		-0.478091		0	0		1
LAMC1	1.14065	1.70427	0.685994	0.647059	-0.563547
LAMC2
Laminin	1.85079	1.32049	1.31401	0.884744	0.156651		-0.0941921	-0.0941921	-0.169155	0.499504
Laminin1		0		0
lamotrigine
LAMTOR5
L-arginine		-1.76917		-1.97252
LASP1
latanoprost
latrunculin B
LATS2
lauroylcarnitine
LBX1
L-carnitine									-2
LCAT				-0.816497
LCK				1.52632	1.27581				0.896258
LCN2				1.46215	1.03479		0.881039		1.53142
L-cysteine		-0.152499		-0.152499
LDB1		-1.9799
LDL	2.00119	2.16263	1.58907	3.86002	3.03524		1.82006	2.14703	2.64222	2.56518
LDL-cholesterol
LDLR	1.14713	-0.345197	-0.185752	1.12688	2.12491		-0.792118	1.72045		0.440086
L-dopa	1.00286	-3.59715	-3.19874	-2.6466	-1.48556		0.520153	-0.828882	-0.742643	-1.38583
LEF1		-0.69862		0.654654	1.91054		-0.452891	-0.0171423	0.181362
lenalidomide	1.12297	-3.20858		-1.62187	-2.44382			-0.484145		-1.79578
LEP	2.57586	0.836333	0.172511	2.04099	2.18276		2.6333	2.64955	1.98963	2.13532
LEPR	1.65037	0.503853	0.920283	1.41842	0.765515		1.12115	0.086711	0.64496	-0.393349
LEPROT
LEPROTL1
let-7	-2.12413	-3.89459	-3.82312	-3.89448	-4.4268			-5.03329	-4.62282	-4.15596
let-7a-5p (and other miRNAs w/seed GAGGUAG)	-2.80717	-4.18293	-2.47636	-3.84348	-3.38934		-2.53316	-4.3825	-4.54548	-5.00524
leucine	1.47959	0.164399						0.6
leucovorin
leukotriene B4	0.270719
leukotriene C4	1.99435	1.7231		2.23077	2.23077		1.99092		1.99092
leukotriene D4	0.80115	0.578947	-0.762753	2.54	1.62898		1.50787	0.389833	1.1767	-0.282216
leupeptin		-1.01587						-1.19452	-0.764706	-0.762493
leuprolide	-1.52343	-0.354855		2.2	1.19452		-1.49137	0.298275	0.193369
levetiracetam		0.27735
levothyroxine		-0.439385			0.902181				0.8
LFM-A13
LG100268				1.7291	2.4327		0.122938		-0.347621
LGALS1		-0.741694			0.0076937		1.91485		1.15434
LGALS12
LGALS3		-1.17782	-0.517455	-0.941979	0.33955		-0.894737	-0.764706	-0.38829	-0.536895
LGALS7/LGALS7B			-0.774758	-0.774758	-0.774758			-0.774758	-0.774758	-0.774758
LGI1
LGK-974
L-glutamic acid	0.10574	0.962795	-0.131378	2.52506	2.08929				1.87177
Lh	1.21796	0.692208	0.875485	1.75108	1.48194		1.59323	2.16744	1.68071	2.08779
LHCGR									-0.153015	-0.460209
L-histidine		-0.413114
LHX1	1.70499		0.328976	-1.34269			0.606478	0.0940721	0.786334
LHX2				0.185695	0.185695
LIF	2.98593	-0.270038	-0.903771	-0.0427942	1.09894		2.4818	2.18583	1.44929	0.0183538
LIFR
LILRB1
LIMA1
LIMS1		-1.28745
[truncated: 1,977 more rows]
[truncated: 1 more columns]

## Sheet: UA_vs_sham
Upstream regulators	Z-6H Sham	Z-1D Sham	Z-2D Sham	Z-3D Sham	Z-5D Sham		M-6H Sham	M-2D Sham	M-3D Sham	M-6D Sham
(+)-catechin		-0.404232
(+)-MK-801	-0.754928	-0.852098	-0.367223	-1.02537	-0.989602		-0.356664	-1.92943	-1.42106	-0.884362
(5-(4-N-methyl-N(2-pyridyl)amino)ethoxy)benzyl thiazolidine-2,4-dione			0.246183		-0.282843
[D-Ala2,N-Me-Phe4,Gly5-ol]-Enkephalin									-0.00931655	-1.05634
1-(carboxymethylthio)tetradecane			-0.896258
1,2-dimethylhydrazine		1.34164	-0.447214	0.447214	2
1,2-dithiol-3-thione		0.519551		2.66515
1,4-bis[2-(3,5-dichloropyridyloxy)]benzene		2.11937	2.07401	2.59445	3.23017				1.71754	2.23766
11,12-epoxyeicosatrienoic acid			2.17663	2	1.48149
13-hydroxyoctadecadienoic acid	-0.5547	0.5547	0.152499	1.06749
15(S)-HETE		0.390567			0.927173
15-deoxy-delta-12,14 -PGJ 2	0.276063	-0.376496	0.243146	0.9988	-1.05911		0.266474	0.0917627	-0.298906	-1.05759
16,16-dimethylprostaglandin E2					0.918708
17-alpha-ethinylestradiol	1.64275	0.917888	1.56884	-0.449579	1.02636			1.2394	2.08345	0.739796
1'-acetoxychavicol acetate		-1.34164		-2
1L-6-hydroxymethyl-chiro-inositol 2-(R)-2-O-methyl-3-O-octadecylcarbonate		-0.152499
1-methyl-4-phenyl-1,2,3,6-tetrahydropyridine	1.91034	3.21934	2.43943	2.10673	2.91178		2.4004	1.96946	2.05798	2.4
2,3 butanedione monoxime	0.5547	-0.410365	0.538672		0.0561656
2,3,4,7,8-pentachlorodibenzofuran	-1.13389				0.507673		1.34164		1.21854
2,4,5,2',4',5'-hexachlorobiphenyl				-0.534522	-1.1547				-1	1
2,4-dinitrophenol-ovalbumin conjugate	0.816497						2		-0.447214
22(R)-hydroxycholesterol		-0.0623536	-0.140132	0.712479	-1.28933					-1.00284
24-hydroxycholesterol	-0.815741	0.819221	0.48902	1.27246	-0.0737782					0.301084
25-hydroxycholesterol	1.12721	1.02419	-1.66139	1.7806	-0.866032		1.66667	1.13389	0.738549	0.684858
26s Proteasome	-0.342997	-0.0369358		-0.644658	-1.76141		-0.341882		-1.50966	-1.98248
27-hydroxycholesterol	-1.94477	2.18661		1.70958	0.750768
2-amino-1-methyl-6-phenylimidazo-4-5-b-pyridine				1.91237
2-amino-5-phosphonovaleric acid	-2.98629	-2.86929	-0.441793	-2.09479	-1.15077		-2.11948	-2.37497	-1.75785	-1.9274
2-aminopurine		-2.38235	-2.16366
2-arachidonoylglycerol	-1.94605	-1.29378	0.0490525	-0.0120377	-1.53464				-0.823619
2-bromoethylamine			2.17286	3.56887	1.41108				2.4327	2.4327
2-deoxyglucose		0.346324
2-hydroxy-1-naphthylaldehyde isonicotinoyl hydrazone		-1.9799	-1.06749
3,3'-diindolylmethane	0.436436	0.363639	-0.684631	0.770755	-1.2562		0.640184		-0.835476	-0.835476
3,4,5,3',4'-pentachlorobiphenyl	-0.904534	-1.23363	-1.45883		1.10053				0.764713
3,5-diiodothyronine		-1.88982	-1.88982		-2
3,5-L-diiodothyronine		1
3-deazaneplanocin	0.769641	0.394159	0.0816048		-0.746038		1.75096	-0.0743294	1.13388	0.0280276
3-methyladenine							0.501557	-0.410365	-0.205717
3-methylcholanthrene	0.807962						1.82961
3-nitropropionic acid	0.075356	0.837708	-0.340509	2.41423	0.957842				0.671195
4-hydroxynonenal	1.79632	0.44414	-0.540028	-0.423334	1.11178		1.95648		0.868037	-0.0131539
4-hydroxytamoxifen	0.861547	-0.642424	1.01131	1.99001	2.25691		1.77694	2.36982	2.31365	2.2362
4-methylnitrosoamino-1-(3-pyridinyl)-1-butanone	1.95753	1.36665	0.812942		1.22241
4-nitroquinoline-1-oxide	1.16518	3.11268	2.77843	2.77843	2.95006				2.95006	2.6295
4-tert-octylphenol		1.88982	1.88982		1.88982
5,8,11,14-eicosatetraynoic acid		-0.113961		-1.40841	-1.1094
5-azacytidine	1.5351	0.522649	1.36747	2.33928	2.20471		1.22177	-0.506396	0.8366	-0.424612
5-fluorouracil		2.65466	1.67518		2.83051				1.00521
5-hydroxytryptamine	2.40033	3.27651	0.8484	2.03125	2.45806		2.57793	2.20788	2.47414	1.87434
5'-methylthioadenosine					-1.88982
5-N-ethylcarboxamido adenosine	0.694999	-0.111804	0.413146	1.25063	-0.423286		1.83628	-0.780869	-0.384111	-1.00974
5-O-mycolyl-beta-araf-(1->2)-5-O-mycolyl-alpha-araf-(1->1')-glycerol	1.29099	1.14708	0.894427	2.52982	1.80739		2.82843
6,7-dinitroquinoxaline-2,3-dione	1.73205	1.73205
6-amino-4-(4-phenoxyphenylethylamino)quinazoline			-1.19208
6-cyano-7-nitroquinoxaline-2,3-dione		-1.98052
6-hydroxydopamine	0.0613257				0.642715		-0.254457	0.5547	2.15811	1.83113
6-mercaptopurine					-2.2188
8-bromo-cAMP	1.54775	0.220535	-1.78376	1.0897	1.62637		0.420672	0.362777	-0.427519	0.463767
8-bromoguanosine 3',5'-cyclic monophosphate	-0.294118	1.92916	0.156174	0.05547	1.10531		1.67126		0.557086
8-chlorophenylthio-adenosine 3',5'-cyclic monophosphate	0.405096			0.335624	-1.96
9,10-dimethyl-1,2-benzanthracene	1.60596	-0.0414591	0.820296		2.0414		2.2111	0.974695	1.64497
9Z,11E-octadecadienoic acid	1.70588								-1.38675	-1.03975
A23187	1.56084	2.53082	-0.0194912	3.20159	2.82237		2.91582	2.90354	1.90503	2.72783
A2M		2.23607			1.19523
ABCA1	0.496292	0.570396	1.41549	0.0501886	-0.684211		-1.1767	-1.46059	-0.730297	-1.52128
ABCB4		0.261612			-2.58887					-2.62068
ABCB6		1.88982	1.13389
ABCC1		2.4327	2.2188	2	2.4327				2.2188
ABCC8		2.21315	2.42857		1.7804
ABCG1	-0.27735						-1.34164
ABL1		2.17211	1.34808		1.83851				1.49378
ACACA			-0.762493
ACACB		-0.57735		0.57735
ACE	-0.152499	1.98248			-0.152499
ACE2	0.282843	-1.38675		-0.762493	0.282843
acetaldehyde	1	1.88982	1.46261		2.6295					2.2188
acetaminophen	-0.444286	1.79423	1.38954	2.45951	2.46001		1.98781		-0.591903
acetovanillone	-0.843865	-0.0826192	-1.59792	-1.54303	-1.9799		-2.19089		-1.94666	-1.54303
acetylcholine			-1.69775
acetyl-L-carnitine			-1.47959
ACHE	0		2	1	2.23607
ACKR2	2.23607							1.63299
ACO1		1.98248
ACOX1	-0.229416	0.525786	-0.293105	-1.41261	0.302614		-0.301511	0.707107		2.32379
acrolein	0.759468		1.93319
acrylamide		1
ACSL5		-0.896258	-0.128037	0.896258	2.2188
ACTA2		-0.741999	-0.447214
ACTB		1.34164	2.44949	2.23607	2.44949				2
actinomycin D	-1.68445	-2.09598	-0.283598	-3.32838	-1.68048		-3.33644	-2.5426	-1.97826	-2.2881
actinonin		3.16228	3.16228		2.64575
ACTL6A		0.632456	0.707107	1.34164	1.13389				1
ACVR1C					0.152499
ACVRL1	-0.6	-0.646997	0	0.38829	0.321126		-0.654654
ADA		-1.45204	-1.57968	-1.36547	-1.97034		-2.19036
ADAM10	0.282843
ADAM17					2
ADAMTS12	2	-2		-2.64575			-1			-1.63299
Adaptor protein 1		2		1	2
ADCY		0		0.5547
ADCYAP1	1.13952	-0.0215926	-0.0465506	1.22391	1.56361		1.70644	-1.17143	0.0149923	-0.13082
adenosine	1.33028	0.58788	-0.23492	-1.12631	-5.74381e-17		0.244851	1.06715	0.294118	-0.159674
ADIPOQ	0.425848	-1.61802	-1.71249	-2.18113	-1.43951		1.07871	0.0955637	0.661716	0.0190967
ADIPOR2		0.447214	1		0
ADM	-0.143021			-0.480897	-0.612228		0.263629
ADORA2A	0.620052	-0.581394	0.838628	0.842701	0.65255		-0.197819	-0.0532246	-0.730229	-1.01193
ADORA2B	0.478091				0.215666		1.43208
ADP	1.19452			0.911322			0.904819		1.01413	1.01413
ADRA1B		-0.152499
ADRB	0.803348	-0.410122	-0.792272	1.03159	-0.460808		-0.525065		0.287192	-0.351123
ADRB3	0.218218	0.877896							0.727607
advanced glycation end-products	1.13054	1.68928		0.474579	1.82574		2.39511	1.446	2.18282	1.36895
AEBP1	0.5547	-0.744034	-0.241834	-0.532524	1.06749
AG490	0.698401	-0.0262477	-0.994209	-1.60036	-1.03988		-0.834681		-1.55079	-1.44664
AGER	1.87925	0.174921					1.68623	2.19089	1.96116
agmatine	-0.480519	-1.0903	-1.12638	-0.858629
AGN194204		0.133774	0.635999	2.17514	1.86937				0.507673	1.1547
AGPAT2		0		1
AGPAT9		1		0
AGT	2.88953	2.2359	0.85002	4.71934	4.54886		3.23963	3.85594	3.55519	3.51589
AGTR1	0.685994	2.07927	0.538672	1.66448	0.996928		0.996928	1.09109	0.61017	1.70588
Agtr1b	1.43208	-0.762493			0.685994
AGTR2				0.640184						-0.764706
AHI1				0.377964
AHR	-0.497454	0.394857	-1.15582	-0.0402574	-0.567774		0.679704	-0.471161	-1.20669	-1.26307
AICAR	-0.798621	0.300976	0.0142119	-0.605324	-1.943		-0.414515		-1.32354	-0.459672
Akt	1.22464	2.27488	3.0735	2.97079	4.44361		2.76669	1.48859	3.50296	2.1425
AKT1		0.703404	0.278795	-0.0911109	1.32626		2.18494	1.53084	1.98638	1.58044
AKT2		-1.76547
AKT3		-1.34164			-0.447214
ALB	0.766046	1.81612			1.50006		1.95917		1.96865
ALDH1A1		1.19452	1.19452
ALDH1A2	-1.4	-0.112509					-2	0		-1.13389
ALDH2		-1.66448			-2.2188
aldosterone	2.54268	0.717797	2.01413	0.922143	2.20083		2.43153	2.40333	2.88194	2.05218
alendronic acid					-0.152499
alitretinoin	0.652998	-0.663627	-0.838645	-0.390607	-1.15474		-1.3257	0.830278	0.0928029	1.61475
allopregnanolone			1.1717
allopurinol	-0.971286	0.142857	2.28571	3.42231	2.44451		0	-0.816497	1.50756	1.38675
ALOX12		0.303218	-0.370599				1.95432
ALOX15	-1.43208	0.425159	0.425159	1.28534					1.97246	1.97246
ALOX5	-0.341882	-0.47036	-0.426401	-0.646997	-1.12858		0.727607	-0.152499
Alpha catenin	-1.79635	-0.298005	-3.73101	-3.35489	-5.36342		-1.50477	-1.11772	-2.96093	-4.75155
alpha-hydroxyglutarate		-1
alpha-tocopherol	0.861156								0.105925	0.254457
alpha-tocopherol succinate		0.370739
alvocidib		-0.706002		-1.55406	-2.02997
Am 580	-1.58569	1.11321		-0.524142	2.27427		0.16873	0.848528	0.699896	1.21615
amino acids	-1.04566	-0.712628	2.35709		0.27735
amiodarone	-0.447214	0.301511	0.27735	1	0					0.447214
amitriptyline				0.677544	0.0477144					1
amlodipine		0	-1.89737	-2	-2.44949		-1		-2	-2.23607
amphetamine	2.40349	2.49889	-0.795924	0.569803	2.24563		2.598	1.32886		1.47173
AMPK	0.504525	-1.57282	-2.14458	-0.326844	-1.85763		1.79372	0.820657	-0.149305	0.290985
anakinra				0					-2
anandamide	1.45204		1.98248	1.98248	1.57968				1.95962	1.95962
androgen	-1.00514	-0.596082	0.302614	-0.430775	-0.607864		-1.40214		-1.12115	-0.912871
andrographolide		-0.640345		-0.4159			-1.15857		-0.463428
ANGPT1		1.05361	0.341882	0.848528	0.727607
ANGPT2		1.03741	1.97109	3.98316	3.71981		1.86254	2.20043	2.95609	2.40098
anisomycin	2.75367	1.03989	-2.47649	0.632456	1.5487		1.58106	2.14849	2.35337	1.21106
ANPEP		-1.95083	-1.95083		-1.95083
ANXA1		-0.9894	-0.511914	-0.154201	-0.462604				-1.0613	-0.688515
ANXA2		1.12858	-0.184115							1.05337
ANXA7	0.632456	-0.218218	0.727607		1.1547		0.377964	-0.377964		0.333333
Ap1	1.49975	2.01233	1.48927	1.90702	2.99922		3.09397	2.59918	3.39009	3.26494
APBB1		-0.337778	-2.17647	0.72111	0.817303
APC		-1.60899	-0.615477		-1.15985		-1.09109		-1.96946	-2.19393
APH1A		-0.152499
apicidin		2.2188			0.447214
apigenin	-1.27802	-0.747409		-0.182574	-2.20113		-2.18282
aplidine	2.19036	2.19036	-1.06749				1.95083
APLN	0.359908	-1.049		-1.55406	-0.0660819		1.2778	0.0830455		1.02454
APOA1	0.911371	0.847638	0.491636	-0.0808305	-1.18196				-0.555557
APOA2			1.96116
APOA4									0.471405	1.18792
APOE	0.109816	-2.30796	-1.97625	-1.81769	-2.24703		-2.38709	-1.63674	-3.05749	-2.63668
apomorphine	1.92831	1.36952		0.816497			1.48907		1.22741
APP	0.773332	1.65274	2.11718	1.91908	2.09914		2.32186	0.335516	1.81006	1.3009
AQP5			1.9799
AR	-0.765941	-0.0484526	0.980448	0.794624	1.76337		2.07614	0.603877	2.44706	2.56287
arachidonic acid	1.41973	2.29109	-0.154843	1.20337	1.36196		1.53979	1.80656	0.896985	1.91131
arachidonyltrifluoromethane		-1.1767	0.784465		-1.1767
AREG	1.64736	1.92681	2.10641	2.24731	2.5957		2.18661	2.18938	2.2076	2.59147
arginine	-0.242536	0.174078
ARHGDIG			-0.707107
ARID4B			1.06749
ARNT		-2.9193	-1.95279	-0.39582	-0.457496		1.82953	0.764706	-1.65968
ARNT2	0	0.169031	0.447214	3.13786	4		2.32379			3.15296
ARNTL		-1.56178		-0.284546
arotinoid acid	-1.22917				0.128037		-1		-1.00904	-0.044699
ARRB1		0.152499			0.152499
ARRB2	-1	-0.640184	-0.640184		0.128037					0
arsenic		-1.97438	-1.97438		-1.2637				-0.848528
arsenic trioxide	2.55552	0.0678981	0.218269	1.87446	-0.151596		1.37324		0.776837	1.72277
arsenite	1.61462	-0.287823	0.198055		0.452359		1.84159	1.3974	1.55172	0.775324
artesunic acid	-0.848528	-1.45521	-1.45521	-1.73205	-2.42487
ASAH1	-1.23091	-0.103695	1.58886	-0.478913	0				1.06749
ASCL1	1.19001	1.39804	0.837034	0.985952	1.82448		-0.218218	0.263158	0.209611	1.82448
ascorbic acid	0.911639	-1.57411	-0.872204	-0.313993	-0.247436		-0.156174	-0.647059	-0.413348
asiatic acid				-0.31741	-0.685994
ASIP	0.691564			-1.09109
asoprisnil	-0.478091	0.710742	-0.710742	-1.31995	-1.46261		0		-0.816497
aspirin		-0.776205		-1.84543	-1.46543				-1.82585	-2.37596
astragalin					-1.98248
ATF1	-1.13137	0	-0.57735						-0.390567	-0.390567
ATF2	1.6512	0.985606	-0.634131	2.1189	2.38931		1.94066	1.10265	2.18643	0.443057
ATF3		0.412926	-1.02365	-0.853206	-1.9435		0.0919006		-1.27612	-1.44847
ATF4	1.94936	1.33512	0.871386	1.50792	0.430561		0.884725	1.66448	2.02943	0.492693
ATF6		-0.576018	-1.10276		-0.300753
ATG7	0.327625	-0.516471	0.19878	-0.922288	-1.8368		-2		-1.32518
ATM		0.260906	1.0815	0.177751	1.23861				0.59612
atorvastatin	-1.93641	-0.424407	-1.29994	-1.54958	-2.55859		0.0598816		-2.13231	-0.59832
ATP	1.48353	2.70082	0.5481	0.909124	2.64737		0.78561	-0.0904698	0.0239981	-0.19748
ATP2A2		0.447214		1
ATP7B		-0.904534	-1.60357	-1.26491	-0.904534				-1.63299	-1
ATP-gamma-S	1.21435			1.92165						-0.667397
ATR		-0.27735	0.650945	-1.06749	-0.390567
atrasentan		-0.152499
auranofin		0.411765		0.0628695	-0.294118		0.817303		-0.691564
AURKA		0.0383201
AURKB			2.82843	1.13389
aurothioglucose			1.38675							-0.152499
AVP	1.31579	1.07211			1.94257		2.17647	1.17948	1.06474	0.93961
AXIN1	-0.152499									-1.13137
AXL	1.98248
AZGP1		1.14373			0.390567
azoxymethane	0.72507	0.37762		0.264486	1.10267
BACH1			0.527339		-0.208483
BACH2		0.0610917	-2.39205				-1.18792	-1.18792
bafilomycin A1				-1.4771
BAG1										1
baicalein		-1.48179	-0.664411	-0.76122	-1.32354			0.5547	-0.646997	-1.02565
baicalin	0.21887	0.988847	2.72394	1.91335	1.61427					2.44949
BAK1		1.98248
BAPTA-AM	-2.77843	-0.450005	1.10432		-1.62464		-2.40114		-1.45204	-1.53436
bardoxolone		0.552345	0.552345		6.66134e-17
bardoxolone methyl				-0.842484	-1.96931
batimastat		0.128037	2.21321	1.71499	1.66448
BAX		2.54951	1.76505	2.15666					1.06749
Bay 11-7082	-0.332182	-1.61827		-1.1929	-2.35907		-2.39402		-2.3786
BBI608		-0.569652		-2.7196	-3.72857
BCKDK			0.152499
BCL11B							-1.38675		-0.447214
BCL2		-2.3459	-2.67468		-1.83228				-0.816968
BCL2L1									0.447214
BCL3					0.160128
BCL6		0.0677285		1.6132	1.37355				1.29707	1.42054
BCL6B			1.9799
BCR (complex)		-0.329318		-0.365587	0.444905		2.12554
BDKRB2	-1.19925						-1.25728		-1.22462
BDNF	0.214916	0.537186	-1.53417	0.247223	1.30668		1.418	-0.0818304	0.110337	1.00855
bee venom	1.39546	-1.80831	-2.00187	-1.80115	-0.114411		2.109	0.084707	-1.13321	-1.54209
benzene		0.727607	1.29099	1.26491	1.50756					0
benzo(a)pyrene	0.887325	-0.810357	-1.4318	0.671191	-0.769305		1.00911	0.177683	-0.241424	0.794948
benzyl isothiocyanate	0.152499	0.0526316		0.5547	-1.446					-1.09109
benzyloxycarbonyl-Leu-Leu-Leu aldehyde	-0.485881	-0.434614	-1.66517	1.51793	0.884748		0.671032	0.662265	0.338335	0.366675
berberine	0.526009	-1.58719	-1.9008	-0.537623	-2.42802		-1.32453		-0.799604	-0.662266
beta-1,3-glucan			-1.34164		-0.447214		1
beta-carotene		-0.507673		-1.2376					-0.640184	0.128037
beta-estradiol	0.472699	1.49487	1.64958	3.17059	2.54941		3.43413	0.397536	2.11669	1.70634
beta-glycerophosphoric acid		1.19174		0.492366
beta-naphthoflavone	-0.108465	-2.58111
betulinic acid	-0.27735	-0.341882		-0.512989	-1.93733				-2.2188	-1.66448
bevacizumab				1.98248
bexarotene	-1.48985	-0.00814721	0.777179	-0.880982	0.616907		-2.22993		-0.66793	-0.120421
bezafibrate	-2.13861	-2.31609	-1.9839	-0.0809776	-0.434057			0.83205		-0.0588235
BGN	-1.06749									-0.152499
bicalutamide					-1.02565
bicuculline	2.52575	2.49529	-1.02132	1.72328	1.36769		3.10959	1.26396	1.26396	0.254927
BID		1.88982	1.63299	2.4327	1.66448
bile acid								0.809291
bisindolylmaleimide	-2.15455	-1.85091	-1.94012	-0.840209	-2.13656		-2.18282	-1.94145	-2.39317	-2.18282
bisindolylmaleimide I	-3.13986	-1.91009	-2.16412	-3.30515	-3.32868		-2.78503	-1.913	-3.41075	-3.05253
bisphenol A	2.36438	0.735128	0.759083	0.9156	2.58333		0.388096	2.18643	1.39097	0.343956
bleomycin	0.909947	1.85266	3.29009	4.45154	5.27426		2.77523	1.99969	3.21613	4.24391
BLOC1S5	1.06749	1.98248	1.69775
BMI1	-1.09952	0.872165	-0.35181	0.826087	0.0849858
BMP	-0.152499	1.98248
BMP15			2.15666	1.19523	1.50966					0.654654
BMP2	-0.361456	0.360829	0.890712	0.418033	1.93695		2.81921	0.299392	2.36635	0.789278
BMP4	0.471789	-0.309346	0.717249	-0.501433	0.488335		0.818691		1.04241	0.457389
BMP6	3.36184	0.874147	0.603572	0.695889	1.08044		2.25099	1.94145	2.70146	-0.12
BMP7	0.478366	0.597139	1.23207	0.389605	0.413386		1.80275	0.378169	1.33808	0.434243
BMPER		1.50111
BMPR1A	-0.232561	-0.303676		0.290284	2.1789				0.5547	1.03226
BMPR1B	-0.239046	0.128037		-0.27735	1.45521				1.06749	1.06749
BMS-690514		-1.60357	-2.11058	-3.16228	-3.31662				-2.23607
BMS-754807		-1.63299	-1		0				-2
BNIP3L		-1.38942	-1.92308	-1.05792	-0.950654			-1.34164	-0.904534	-1.26491
bortezomib	0.862933	0.952994		2.02878	2.03221
bosentan				-2
BQ-788			1.98248
BRAF		0.762493
BRCA1		-1.5648	-0.609318	-0.0157449	-0.569499		1.51236		-0.415019	0.314453
BRD4		1.53696	2.47666	1.43706	2.6411				0.207514	0.540801
brefeldin A	0.966456	1.40959	0.844261		1.1399		1.33565	0.694755	0.573827	0.13673
bromobenzene			-0.73889		-0.800597
bromodeoxyuridine								0.640184
bryostatin 1		-0.198728			-0.561644
BSG		-1.86595
BTC		1.63299	1.63299	2.44949	1.34164
BTG2		-1.25275
BTNL2	1.26491	0.242536			1.97566
bucladesine	1.24232	-0.863293	-0.813289	1.29437	1.88091		2.87927	0.350649	-0.0599908	1.11504
budesonide		-0.137233	1.03378	-0.154326	0.66502				1.97021
bufalin					-0.447214			0.447214	1.34164	0
bupivacaine		1	0
butaprost	-1.7505	0.134594			0.755797		-0.4842		-0.0638877
buthionine sulfoximine		2.6295	2.2188	2.2188	2.4327			1.06749		1.98248
butylated hydroxyanisol	0.535656						1.96296		-0.205086
butylated hydroxytoluene	1.97697	1.97697			1.98052
butyric acid	2.1318	-0.907463	-1.00837	-1.28638	-1.18867		0.921073	1.66599	-0.0802102	-0.83587
C/ebp	-1.03757				1.41108		0.207514	1.91005	2.15555	2.15555
C1QA		-2
C3							-0.536895
C5	3.04979	1.48829		1.90187	1.94852		1.30105
C5AR1							1.06749
Ca2+	0.635414	0.932402	-0.715424	1.8996	1.44593		2.59093	1.33541	1.79353	0.858648
cadmium	0.761651	0.973018	0.409119		1.16894		-0.044346	2.15697	2.17107	1.9663
cadmium chloride		2.73296	1.61547	1.63485	1.91314			0.974584	1.47998	1.23816
caffeic acid phenethyl ester		-0.99454	-1.8683		-2.74374				-0.627036	-1.3158
caffeine	0.344541	0.0546374	-0.458585	0.710742	0.98646		-0.516402	-0.516402	-0.327009	0.407755
CALCA	-0.0039671	-0.28611	-0.624902	1.00434	0.536438		0.936484	-0.506256		2.74985
Calcineurin A		-1.1094	-1.1094
Calcineurin protein(s)	0.601561	-0.842532	-1.50845	1.86359	-1.14572		-0.079274		-0.036848	0.0569906
calcipotriene	1.03923	1.96396	0.727607	1.06749	1.93733			-0.762493
calcitriol	1.02341	-2.23254	-2.68298	-3.45221	-3.11932		0.614807	-1.43844	-2.88968	-2.11777
calmidazolium	-1	-1			-1				-2	-2
Calmodulin	0.943456		1.51502	1
calpain		-0.691564	-0.691564	-0.168497
calpeptin			0.390567						-0.848528
calphostin C	0.365508	-0.641382	0.292445	-2.11992	-0.944364		-2.41608	-1.74439	-1.37501	-1.62201
CALR	2.2188	-0.0417905	0.184228		1.31462		-0.749446		0.173463	0.375927
calyculin A		-0.787562			-0.5547
CAMK4	1.9625	1.00239
CAMP		-0.57735		2.74955	1.75412			1.98248	2.4327	1.46261
camptothecin	1.09467	1.30953	1.00405	1.48654	1.77749		1.21226		1.05398	0.937923
candesartan	-2.54885	-2.04299	-1.33359	-2.54951	-2.82497		-1.33062		-2.42536	-2.56516
candesartan cilexetil		-1.63299	-1		-1.34164
cannabidiol	0.624695	0.335377		1.01587	-0.414515				0.152499	1.06749
cantharidin		-0.57735
capsaicin	0.505262	0.0729409			0.234446		0.66587	0.535547	-0.668434	-0.586224
capsazepine	-0.864923				-1.97697
captopril	1.1366	0.939896	2.4809	2.11899	1.35306		0.867581		2.14286	0.686803
carbamylcholine	1.75472	1.55617	-2.37497		0.928483		2.19531			0.490029
carbenoxolone				0.650945						1.9868
carbohydrate		-2.44949
carbon monoxide	0.233104	-1.23593	-0.378054	-1.66364	-1.17781		-1.05026	-1.11933	-1.499	-1.76846
carbon tetrachloride	1.88966	1.18801	-0.524903	1.90031	2.61833		2.31397	0.868767	1.4371	1.71241
carbonyl cyanide m-chlorophenyl hydrazone	1.26491	-0.300954	1.43684	0.528626	0.632456		0.632456	0.377964	1.13389	0.956183
carboplatin	0.478091	1.55406	2.11058	3.35673	2.13683
cardiotoxin	-0.839181	1.2792	1.42857	2.5	4.3589			-0.333333	1.89737	1.8462
CARM1		1.38675			1.38675
carrageenan	2.44673	2.89273	0.869074	1.6712	3.06701		2.91034	1.09102	2.29449	1.54773
carvedilol		-0.136717	1.23045	-1	-0.820303
CASP1	-0.152499	-1.09109		-0.536895						-0.339422
CASP3	0.27735	1.47113	0.898921	1.48404	1.48775
CASP8					0.247234
caspase		1.53897	2
CASQ2		-1.06749
CASR			-0.355085	0.381535	-1.81847				-0.867599	-0.486816
CASZ1	0.194054	-2.00547	-2.9007	-0.136717	-1.40573		1	0.254457	-1.4045	0
CAT	-0.986666	-0.852803			-1.5683		-1.446		-1	-2.20723
CAV1	-0.287242	-0.0269093	-0.924833	-0.290329	1.22499		0.707107	1	1.88982	1.63299
CBFA2T3		0.492366	-0.57735	-0.246183	-0.246183
CBFB	1.76212	-0.571429	-0.887848	0.359211	-0.688247		-0.816497
CBL		0.552074	2.23607						-1	0
Cbp/p300			0.130189		1.1094				-0.152499
CBX7	-0.278693	-0.743128	-0.423077	-0.668965	-1.41226			-0.447214	-2.23607	-1
CCAR1			-0.152499
CCK					0.427817		1.18279		1.18279	0.427817
CCL11	1.91237		2.40063		2.55912			0.654654	2.42536
Ccl2	1.49241	-0.304997		1.67286	2.37289					-0.862662
CCL2	1.22802	-0.538135	-0.207498	0.170148	1.42011		-0.509175	-1.13389	1.07666	0.232477
CCL3										0.339422
CCL5		2.38956			2.57497				2.20043
Ccl6		1.19452	1.96396	1.96396	1.96865
CCND1	0.0739221	3.53982	4.02198	4.17296	4.0025		0.745356	1.09322	3.44494	2.89101
CCNE1		1.66448	1.02565	1.38675	1.66448
CCNK		2.74563	2.535	2.37232	2.56495					1.40841
CCR1	1.4	1.61615	1.94145	2.41176	2.35886		1.96396			1.13389
CCR5	0.914586			1.98889					1.15769
CD 437		2.15455	1.35321	-2.02188	1.52233
CD14	0.339109	2.37973		1.7869	2.40059		1.93878		2.18101
CD2					2.13767					2
CD200	0.927173				-0.650945
CD24	0.662589	0.966092	2.02113	2.33333	2.27917				2.22378
CD247							-2
CD28	-2.97735	-2.36896	-1.9341	-2.60158	-2.5288		-1.68056
CD3	-3.51145	-2.1815	-1.90356	-4.19742	-4.08023		-2.4756		-1.25319	-1.95601
CD36		2.13767		2.23607
CD38	0.225494	0.881733	-0.414478	2.5202	3.12984			1.94145	2.14703
CD3E		-2.4327		-2.2188	-2.60709
CD4					0.694808
CD40	1.52457	0.855499	2.18947	1.02705	1.96098		1.01594	1.0891	1.99558	2.61627
CD40LG	0.289519	1.49345	1.193	1.65255	3.57299		2.93089	2.93502	3.2338	2.64827
CD44	-0.991652	0.945475	2.14394	2.82136	3.64787		0.964593	1.31995	1.88184	2.8866
CD47	2.2188		2.4327		0.896258
CD5		2.2188			2.55331
CD53		-1	0
CD86	2			2	2
CD9	1.10123	-1.17447		1.0756				-0.304604		-0.313363
CD99		1.9557	-0.232495
CDC42	1.34164								1.34164	1.34164
Cdc42		-1.97566	-1.97566		-1.97566
CDH1	-1.05618	-0.303291	-1.00224	-0.529999	-0.565217		-0.242536	0.178965	-1.37795	-1.41698
CDH11		0.507673	0.852803	0.816497					1
CDH2			1.95962
CDK1		0.780869			0.780869
CDK2		1.13389	-0.164399	0.447214	0				0
CDK5		1.98248
CDK6		1.13137
CDK8		-0.373718	-1.98456
CDK9	-0.218218	2.05882	1.45565	2.15555	1.56134
CDKN1A	-0.232278	-2.36032	-2.99763	-2.3365	-3.28669		-0.969568		-2.6067	-1.9711
CDKN1B	0.194257	0.379792	1.20043	-1.84369	-1.60636		0		-0.652753
Cdkn1c		0		0.218218	0
CDKN2A	-1.2028	-4.42835	-4.64959	-3.70333	-4.47859		-1.82114	0.209611	-3.04287	-2.48868
CDKN2B		1
CDX1	1.2376
CDX2	2.37698		0.587047		2.18368					0.699896
CEACAM1				-2.21321	-1.9799
CEBPA	1.59652	1.31337	1.84433	1.73707	1.21108		1.12037	2.47724	1.82434	1.17849
CEBPB	-0.0371052	0.154062	0.947143	2.10966	3.20345		0.739095	1.54381	2.94324	1.8321
CEBPD	1.6471	0.856289	1.47386	0.409778	0.974748		0.353925	2.93604	2.02326	2.14425
CEBPE	2.20723	0.312316	2.07238	1.61224	1.81903				1.9799	1.9799
celecoxib	0.341341	0.357096	-0.320784	-0.493962	-2.33436				-1.44734	-1.06587
cephaloridine	0.961074	2.11819	1.77915	3.05298	3.47059		-0.184115	1.55406	-4.64117e-17	-0.644658
ceramide	1.19131				0.818041				1.11915
cerivastatin	-2.16546	-1.40457	-1.24998	-0.342664	-1.58606		0.1682	0.259201	-0.692863	-0.924491
ceruletide									1.09109	1.09109
CETP				-1						1
cetrorelix				-1.98248
CFLAR		-1.71499
CFTR	-0.322329	-1.59646	-1.3568	-2.37577	-2.00952				-3.13222	-2.81272
Cg	0.594548	1.63072	0.580069	1.54608	2.91964		2.32614	0.846419	2.30209	1.90314
CGA	1.15404			1.30954	1.70892				0.455803	-0.152499
CGB (includes others)	1.15404	0.762493			2.19036					1.00904
CGS 21680	-0.220036	0.214435	2.11116		1.30325		-0.890124	-0.527589	0.0171423
CHADL	1.88982	-0.707107	-1.66667	0	-0.377964			0	-0.377964	-0.377964
CHD4	-1	-0.444286	-0.534522	-1.13389	-0.971286		-1.34164		1.13389	-1.13389
CHD7		-1.34164
CHEK1		0.650791	-0.108465		-0.108465
CHEK2			0.6	1.09109					1.09109
chelerythrine		-0.787562
chenodeoxycholic acid	1.19904		-0.144515	-0.264501	-0.0917403		0.691803		1.50372	-1.49133
chloropromazine	1.72532	1.70941		0.341882	-0.113961		1.1094			-0.341882
chloroquine		0.0148947	0.271128	-0.197137	-0.761042				-1.96652	-1.96652
cholecalciferol	1.29044	2.42974	1.91449	0.878083	1.43826		2.15666		0.443641	0.967702
cholesterol	-0.751369	-0.232919	0.0284294	0.268779	0.691539		0.68131	-0.194082	-0.397995	-0.0160671
cholesterol sulfate		1.19208	0.132453	1.13137
cholic acid	-1.43124	-0.677419	1.64133	1.74917	0.573836		1.1724			-0.494457
choline	-2.18643	0	-0.514344	-1.91404	-2.12132
choline fenofibrate	-0.420862	-0.0538382	0.0669588	0.233805	0.35944
CHRM1	1.6931	1.99803			0.420862		2.21863		1.98052
CHRM3	2.2188	1.1094					2.2188		1.98248
chrysotile asbestos		1.95083	2.18643
CHUK	-0.195336	2.14874	1.11084	2.50286	4.07333		2.05316	1.70469	2.54639	3.57329
CIDEC		1.26491	1		0.377964
cigarette smoke	2.46994	0.405491	0.614522	0.952961	3.35598		2.94984	1.56301	3.02752	2.18847
ciglitazone	-0.630514	-0.0329176	0.532395	0.640715	-1.32694		-0.723758	-1.03425	-1.37446	-0.972523
CIITA	-1.99326		-2.42121
cilostazol	0.562544	0	0.507673	-0.196116	-0.426401		-1.38675	-0.152499	-2.13767	-0.896258
ciprofibrate	-0.593864	-1.15714	-0.206794	1.07571	-0.545317		0.896767	0.326023	-0.125767	-1.24996
ciprofloxacin		0.220564	-0.421076	-0.298511	0.6				-0.142857	0.927173
cisplatin	0.423493	1.94181	2.74237	3.47753	5.238		2.47423		2.71947	3.11545
cis-urocanic acid		1.9868							0.848528
Ck2		-0.294118			-0.152499
CKS1B		1.98052	1.98052	1.98052	2.21863
CLCN5		-1.13137	-0.152499	-1.13137
CLDN2	1.06749
CLDN7	2.45289	0.737865	1.13344	2.15555	0.121268		1.46261
CLEC11A		1.13592	1.0475	0.680451	1.93667
CLEC7A	0.420862
clenbuterol			1.98248		2.21321
CLOCK		-0.27735	0.152499
clodronic acid	-0.242536						0		-1
clofibrate	-0.415614	-2.00469	-2.66557	0.206327	-1.72826					-0.47036
clofibric acid	0.746729
clonidine					-0.5547
clozapine	1.44226	1.61708		-0.640413	1.98335		0.496471	0.286528	-0.00969413	-0.166851
CLU		-1.03923		2.17677
CNB-001			0.27735	0.762493
CNR1	-0.137361		-7.51842e-17	0.682099	1.97697		-0.333333	0.816497	0.762493	0.107075
CNTF	1.5283	1.67705	1.8552	1.43466	1.6166		1.45389		0.527228	-0.0785807
cobalt chloride		0.578276	0.159142	2.18103	1.54219		2.01177	1.38402	1.62897	2.39562
cocaine	2.10681	2.12836	1.0771	1.28962	1.43761		2.40534	0.219419	0.0471948	0.99299
coenzyme Q10	1.96396	-1.70588	-1.66448		-1.27581
COL18A1	-1.85601	-0.338548	-0.0130178		-2.7782		-1.58745	-0.311086	-1.94666	-2.4747
COL4A3			-1.9799		-2.21321					-2.21321
COL6A1		-1.39333	-0.707107		-0.877338				-0.970241
COL9A1				0	-1.74574					0.390567
colchicine	2.94069	1.65295	-0.899697	1.79072			1.55585	1.96396	0.38829	0.38829
Collagen Alpha1		0.431124	1.2813	1.2813	1.57868
Collagen type I	2.7913	0.400827	2.20492	2.98481	3.43376		2.60709	1.96865	2.18282	2.95893
Collagen type III	1.22462	-1.96559
Collagen type IV	2.13767	1.13389	0.447214	1.13389	1		0.447214	1	0.816497	0
Collagen type V	1.22462
Collagen(s)		-0.215666	0.414515	0.900366	-0.242536		-0.774758
COMMD1		1.33377	0.852803	0.896258	0
COMMD3-BMI1	-1.50111		-2.39046
concanamycin A		0.531507		-0.16873
conjugated linoleic acid	-1.35294	-1.80038	-1.80038	-1.57968	-1.25763		-2.2188	-1.98248	-1.7085	-1.45204
CORT	0.390567
corticosterone	0.334291		0.466475	-0.776772	-2.03618		-1.2607	0.222188	0.180814	0.253745
CP-55940		1.34164	0.447214
CPE										0.57735
CpG ODN 1668			1.80743				1.96549	1.3922	2.18661
CpG ODN 1826	-0.555589				3.09507				2.16899
CpG oligonucleotide	-0.92468	2.05324	0.798647	1.99004	3.03695		2.55045		2.90617	2.44824
CPT1C		-2	-2		-2
CR1L	-0.479022	0.79873	-1.93733		-2.55377		-0.958315			-3.12029
Creb	0.919007	-0.0961082	-0.953329	1.74614	0.186675		2.14732	0.62092	1.16514	2.04928
CREB1	2.29205	1.67208	-0.965232	2.56571	0.490006		2.76882	3.55474	1.6615	0.334289
CREB3L1					0.725866					1.06749
CREBBP	0.540539	1.21542	0.990523	0.971715	1.34149		1.96652	-0.190023	2.21718	1.22547
CREM	1.91405	0.429074	-1.99822	0.44217	0.836801		0.940554	-0.0330952	-0.606227	-1.50951
CRH	0.249667		-2.1251		0.8983				0.114946
CRHR1			0.48795
crocidolite asbestos	1.59294	2.72572	0.889859	1.49212	2.79646		1.95909
CRP		2.44735			1.47145
CRYAB	1		0.447214		0					-1.34164
CSF1	2.88929	3.44693	3.06876	3.90929	4.23177		2.64265	1.37204	2.72828	2.96013
CSF1R		2.61861		0.762493	1.50966					1.06749
CSF2	-0.742116	6.5974	6.88823	7.16201	8.41324		2.55667	2.49376	6.81268	5.43829
CSF2RA		1.23091
CSF2RB		1.74113
CSF3	1.29787	3.01096	2.58219	4.19383	3.68592		2.25337	2.09027	3.3335	2.9983
CSHL1	0.333527	0.319574			0.323469		1.54065	0.186812	1.08675	0.7239
CSK		0.218218			0.218218
CSNK2A1			1.06749
CST3		-1.2636			-1.06749
Ctbp	-0.958315	-0.191663	-1.06715
CTBP1	-0.339422		-1.01587		-1.27581		-0.727607	-1.09109	-1.09109	-0.928477
CTBP2		-0.218218
CTF1	0.163976	1.81646	1.30346	1.03153	1.55097
CTGF		-1.13928		2.59317	2.43871		1.0032		1.98235	2.67043
CTLA4				-2.23607	-1.85698				-2
CTNNB1	1.97846	1.25644	0.887569	1.74732	4.17391		2.93566	1.06698	3.02222	3.45998
CTSB		0.462168	-0.231814	1.50316
CTSS		1.38675	2.6295	2	2.4327
cucurbitacin B		-2	-1	-2	-2.18643
CUL4B		1.95283	1.70941
cuprizone	1.06749	0.159674		0.848528					1.98248
curcumin	-1.40397	-1.05447	-0.89233	-2.31026	-4.74588		-2.94151	-1.11546	-2.92966	-2.68588
CUX1		-0.581318	-1	-1.96931	-0.9135				-1.11915	-1.38675
CX3CL1		0.377964	2.6295	1.98248			2.4327		2.2188	1.98248
CXCL10	1.2103				1.30705		1.69236
CXCL12	0.752175	0.940674	0.199993	0.585969	2.56426		2.06016	0.964655	2.61636	2.53358
CXCL8	1.91065	2.32741		2.17175	3.046		1.498		1.36083	0.857304
CXCR4		-0.28843	0.154303		1.75397		0.064957
cyanocobalamin	-0.447214	0.648886	1.54303		1.4
CYBA		-0.27735	-0.27735		0.152499
CYBB		2							2	1.34164
cyclic AMP	2.16535	0.973402	0.101682	2.8459	2.44095		1.76954	1.1301	0.994652	2.55183
Cyclin E		1.43208	0.5547	1.06749	0.5547
cycloheximide	0.753962	0.430229	-2.10059	-0.890344	-0.452288		0.0759279	-1.10177	0.332406	-2.19814
cyclomaltodextrin			1.95283
cyclooxygenase	1.9799				1.98248
cyclopamine		2.41176	1.60074				0.762493		2	0.447214
cyclophosphamide	0.142786	0.947389		1.00798	2.05218		0.345884		1.75808
cyclopiazonic acid	0.0249922	1.99378			1.55757
cyclosporin A	-1.38707	-0.579514	1.23948	-1.07676	-1.18886		-0.749551	-0.15764	-0.887446	-0.647491
CYLD	-0.764706						0.654654
CYP19A1	2.11272	-0.704477	-1.24399	-0.988372	-1.32623			-1.49772	-2.07861	-0.875072
CYP1A1		1.09109	0.928477		0.0588235		-0.218218		-0.2	0.707107
CYP1A2							-0.816497		0.377964	0.707107
CYP1B1			0.953821		1.3598		0.112509		1.55406	1
CYP27A1	-1.06749			-1.446	0.27735					-0.0691714
CYP27B1	0.799523
CYP2E1		1.09138	1.80361	2.39006	2.5774					1.92764
CYP2J2		1.01587	1.98248	1.98248
CYP3A										-1
CYP4F2		-0.27735	0.152499
CYP51A1		-0.816497		-1	-2
CYP7A1	1.34164		0.816497	0.816497						-2.23607
CYR61	2.41106	0.857493	0.443019	1.57243	1.82149		1.50316			2.19393
cytarabine	-2			2.38956					-0.048737
cytochalasin B		-1.73205	-0.57735	-0.57735	0.57735
cytochalasin D	1.09657	0.868765	0.832821	1.19883	-0.184839		-0.329424	-0.104757	-0.283358	0.221079
D609	0.218218	-0.2
DACH1	-2.18019	-2.18019	-0.528626	-0.896258	-1.96116		-1.69775	-1.9799	-1.69775	-1.69775
dacinostat				1.00904	-1.28718
DAG1		-2
daidzein	-0.57735	1.4596	1.09109	2.06474	0.471405				0.534522	-0.27735
dalfampridine	2.3094	1.87171	-1.94145	1.63299	1.11688		3	1.34164	1.34164	0.816497
dasatinib			-1.9868							-1.19208
daunorubicin		-0.0880451	1.70561	0	1.12858
DBH										-0.727607
DCLK1		-0.762493	-0.5547		2.2188
DCN	-0.146691	2.01555	-0.427992	-0.614497	-0.987693		-0.185826	0.323561	1.63631	0.168964
DDIT3				1.52208			1.06878	0.864923		-0.0513665
DDR1		-0.806452	0.314347		1.18474
DDX17			-1
DDX25				-1.15404
DDX5			-1
DDX58	-1.28233	2.0531	2.39543					-0.746729
decitabine	0.356257	-0.0758704	1.88591	3.41549	4.16475		3.18805	-0.0941647	2.50286	2.89296
decursin		-1.34164		-0.447214
DEF6		-0.584323			2.43057		1.98052		1.98052	1.32924
deferoxamine	-0.523069	-0.503113	-1.13558	-1.00897	1.24447		2.96985	2.32468	0.217502	1.0162
dehydroisoandrosterone	1.34558									-0.861156
delta-9-tetrahydrocannabinol	2.13555	1.19332	0.919652	2.15251	0.505697		0.655728		0.639539
deoxycholate	2.57948	1.13915			2.01044			1.97246	1.95962
deoxycorticosterone acetate	-0.156174	-0.202065	1.76301	-0.204658			1.2199		1.46052	1.12339
deoxynivalenol			2.226	1.9897	2.23607
DES		-0.933628
desipramine				0.467606	0.0284376
desmopressin			-5.07922e-17	1.13389	-0.144488					2.42536
desoxycorticosterone	1.71791	2.2111	1.99378	1.99378	1.99378		1.71791	1.71791	2.2111	2.2111
DETA-NONOate	1.71746	1.83544	2.11609	0.270138	1.49723		2.40441	2.16802	2.60088	2.16802
dexamethasone	0.355354	-2.00404	-1.35975	0.591997	0.96678		-1.60074	-0.789744	0.668915	1.01023
dexamethasone phosphate	1.46261	-0.632456	-1.66667		-1
dexmedetomidine	0.654654	-0.6			-0.218218
dextran sulfate	-0.103695	0.725866	-0.0949158	0.474579	1.95959		0.848528	0.848528	1.45521	1.1717
D-fructose	0.958315	0.856608	1.54545	0.953998	2.27851		1.99725		1.36184	1.64794
D-galactosamine	0.59976	1.1891			2.55724		1
DGAT2				-1.98248
DGCR8		-0.218218	0.654654	1.15404	0.5547					1.98248
D-glucose	2.40134	2.21965	1.39124	0.415975	2.00599		1.86031	1.30232	0.878413	0.994033
di(2-ethylhexyl) phthalate	0.659126	0.724286	-2.55331				1.38675
diallyl disulfide		0.950891	0.118861	1.17595			1.96559
diazoxide	-0.2	-1.066		-0.928477	-2.13719					-0.2
dibutyl phthalate	1.22163						2.18275
DICER1	-0.587868	-0.649126	1.10188	0.151234	-0.679837		0.97571	-0.365148	0.0823362	0.214834
dichlororibofuranosylbenzimidazole				-1.06749
dichlorovinylcysteine		0.767866	2.21565		2.21565
diclofenac	-1.27514	0.0152481	2.54885	1.47285	-0.375919
diethylmaleate		-0.846649	0.537051
diethylnitrosamine	0.57735			2.35393	0.700649		0.377964	-2.2188		-1
diethylstilbestrol	0.750227	0.944817	2.66832	0.118399	2.77135		0.583154		0.88494	-0.16812
dihydroartemisinin		-1.16518			-2.19025
dihydrotestosterone	-0.881436	-0.105931	1.86492	2.01617	3.1141		-0.0224937	-0.463662	0.0883383	0.922282
dimethyl fumarate	-0.152499	-8.07806e-17	-0.130189		0.152499
dimethyl sulfoxide	0.9461	-1.61053	-0.678657	-1.92781	-0.0592869		0.923381		-0.436852	0.247436
dimethylnitrosamine		1.11228	1.05712		2.37117		-0.602857
dinoprost	2.2349	0.684605	-0.467695	0.42423	1.36259		1.50609		3.09212	2.5697
DIO2		-1
diosgenin	1.63299		0.112509	1.50966	0.128037
diphenyleneiodonium	-1.26933	-0.929477	-0.987015	-1.4234	-1.84976		-2.60045	-1.96782	-1.73886	-1.69736
Diphtheria Toxin	1.06749
dipyridamole	-1	-0.640184		0	-1.66448
DIRAS3							1
dithiothreitol		0.113961	-1.69775		-0.215666		0.762493		0.762493
DKK1	-2.22582	0.762493	0.643921	0.654654	-1.7191		-0.282843	-0.152499	0.12666	-0.0880451
DLC1		1.06749
DLL1		-0.668965
DLL4		-0.778936	-1.01127
DMD	0.643885	-0.743832	-1.26793	0.47927	0.412242			-0.447214	-1	-0.691564
DMP1	-0.314485	-0.174078	-0.40161	-1.7669	-1.85695		-1.10432		-2	-1.7669
DNMT1				-1.1319	-0.850569				-0.370739
DNMT3B	-0.57735	0	0.242536	0	-0.904534		1.98248
docetaxel	0.11077	2.22296	1.51857	1.6506	1.26456		1.88562		1.60074	1.36895
DOCK8								0.447214
docosahexaenoic acid	-0.214618	-1.0116		0.648392	-1.66459			-1.10962		-1.6702
domoic acid		1.98052			2.20723				1.97246	1.97246
dopamine	1.44156	1.92475	0.979864	0.179605	0.945753		0.893689	0.896221	1.23214	-0.0397464
doxifluridine			0.50416
doxorubicin	2.31673	1.42345	0.766588	1.84802	1.85559		1.72728	1.18474	0.618911	-0.544673
doxycycline	0.729516	-1.26076	-2.56878	-0.328221	-1.65884		0.019996	-0.467606	-0.248421	0.0717091
DPP4	0.243574	0.518358	-0.1591	0.191663	0.00876031				0.191663	-1.50111
DRD1		1.12121			1.9697
DRD2	1.33458	0.254528	1.71898		2.10209		0.271297
DSP		-0.848528	-1.45521	-0.848528	-0.27735					-1.06749
D-thioctic acid			-1.09109
DTNBP1	0.0526316	0.280828	0.0381802		-0.757937				-0.659126
DTX1		-1.67332
DUSP1	-0.585602	-0.483455			-0.780138				1.26291
DUSP5	0	-1.63299			-1.34164		-1.34164	-1	-1	-1
DYRK1A		-2.63493	-2.80976	-2.80976	-2.80976			-2.21565	-2.6264	-2.42949
E. coli B4 lipopolysaccharide	0.8159	2.43285	2.16332	3.42414	4.46912		3.17685	0.528418	2.3432	2.66194
E. coli B5 lipopolysaccharide	1.1111	3.23323	2.37206	3.47795	4.8542		2.65065	3.1892	3.25297	3.23016
E. coli lipopolysaccharide	-1.05337
E. coli serotype 0127B8 lipopolysaccharide	0.179154	0.730323	0.962456	1.9355	2.38809		1.09773	0.764706	1.2572	0.757937
E2f	0.362143	3.59587	4.55684	3.81721	4.12183			1.60924	3.37255	2.279
E2F1	1.33944	4.40593	5.39669	4.66481	5.45438		2.75892		3.28181	3.51403
E2F2	0.263158	2.51447	3.05329	2.13683	2.7196				3.1305	2.12132
E2F3	-0.896258	1.36282	2.92	2.57497	2.59318				2.41176	1.93733
E2F4		0.32339	0.917303	-0.293991	0.0154543				0.146993	-1.06749
E2F6		-1.94145	-2.13809	-1.94145	-2.7136				-1.73205	-0.816497
EBF1	-0.213201	0.455825	-1.1345		0.840785		-1.6698		-0.891028	-1.46807
EBF2	0.927173	-0.816497		-0.447214						2
EBI3	-0.780083				1.51258		-0.218218
ebselen		0.294118	0.168497	-0.27735	-1.45521
EDN1	3.70907	1.89613	1.22982	3.87004	5.26427		3.87375	1.86001	2.84544	3.71226
EDN3	1.88982	-0.821995	-1.96396		1.34164		2	1	2	1.34164
EDNRA		1.06749	2.2188		2.2188					1.98248
EEF1A2		-2.23607	-2	-2	-1.63299				-2
eflornithine	-0.816497	-0.886428	-1.53741	-1.71532	-1.62033		-0.816497		-1	0.377964
EFNB2	0.152499								1.13137
EGF	2.14193	3.24297	2.09966	4.74973	5.53756		4.28253	2.72706	4.74144	4.11683
EGFR	2.05335	2.40952	1.97885	2.84933	4.57095		2.05176	2.6627	2.67165	2.94111
EGLN1		0.154533	1.67408e-16		-0.734553
EGR1	1.76713	1.27922	1.53944	1.99932	3.45019		2.85038	1.86258	2.94067	2.44535
EGR2	0.343629	-0.207413	-0.295125	0.540551	2.03404		2.12132		0.0504996
EGR3	0.128037	1.21226	0.507673	0.816497				1	0.707107	0.377964
EGR4	-0.282843
EHF	-0.194257	2.19777	3.43401	2.86436	3.45551		1.88982		0.777029	1.89737
eicosapentenoic acid	0.55206	-1.48312	-1.69625	-0.0141691	-0.840568		-0.210088	0.702048	-0.932151	-0.413919
EIF2AK2	-1.0943	1.76346	1.494	1.16024	1.35528			-0.816497
EIF2AK3	1.48955	1.44488	-1.05428		1.74584		2.4043		1.93449	1.2171
EIF2AK4	-0.654654	1.27581	0.727607		0.239046				1	-0.6
EIF3A			-0.12356		-0.339422
EIF4E	1.83872	2.43551		2.22378	3.57455				1.88982
EIF4G1			2
EIF4G2		1	1
ELANE	-0.0584206				1.98248		2
ELAVL1		0.274724	0.629206	0.619288	0.52791		2.18879			1.25728
ELF3	-0.727607	-0.168556	-0.2732	-0.662589			1.13137		1.15311	1.9868
ELF4	0						2
ELK1	1.51379	2.21938	1.24919	0.780869	1.17963		2.4944	1.17902	2.36558	1.43686
ELK3	-0.191663	-1.53598			-2.42272		-1.72929	-1.72929	-1.21387	-1.72929
ELK4	1.2464	1.2464			1.2464
ellagic acid		-1.34164		0					-1
ELOVL5	0.927173	1.9868	1.02565	0.351123	-0.536895
embelin		-1.23091		-0.492366
emodin		-0.800597	-0.73889	-0.210683	-0.930964				-0.242536	-0.5547
EMX2	-0.848528
enalapril	0.212331	-0.817624	0.0397464	0.628833	0.516704		-1.19452		0.174078	-1.34164
Endothelin		1.33888	0.278693						1.93351
ENG	0	0.568216	-0.296319	-0.483298	0.107521		-0.218218		-0.522233	-1.4
enoxacin		-0.816497		-1	-0.447214
entinostat		0.140981	0.766195	1.52753	0.968877		-0.59612
ENTPD5					1.13137
EOMES	0.933257	-1.11378	-0.813143		-0.333333		1.38675	0.646997	0.681005
EP300	1.31361	-0.342092	-1.15228	1.74836	0.505424		1.33385	1.66749	1.4003	1.77008
EP400		3.25042	3.40052	3.25803	3.98756				3.21159	2.82843
EPAS1	1.19196	-1.65108	0.408168	2.17238	0.767553		1.46272	2.20081	0.32182	1.40697
EPHB1	2.42949	1.81827	0.492366	0.927173	1.59		2.22378	1.9868	2.22378	1.9868
EPHB2	-1				1
EPHB4	-0.333333	-1.69775	-0.534522	-1.88982	0		1.88982	0
EPHX2		1.46059
epicatechin		-0.794434		1.01487	-0.273087					1.52976
epicatechin gallate		0.896258	0.713714	-0.27735	-0.0923514				0
epigallocatechin-gallate	0.933719	0.386751	-0.475983	-0.589817	-1.65966		-1.05658	-2.85227	-1.96309	-2.57678
epinephrine	0.92582	-0.600284	0.429537	0.784465	1.6296			0.2	0.33955	0.563093
eplerenone	-2.37243	-1.65606	-1.82234	-1.87146	-2.57335		-1.94567	-1.47505	-2.3978	-2.3978
EPO	0.83064	1.23645	-1.20086	-0.287631	1.49836		1.5886	-0.227454		1.68003
epoprostenol	0.713714	0.713714			1.45204		1.16518	1.16518	1.45204	1.16518
epothilone B		-0.646997	-1.13389		-0.239046
epoxomicin	0.440086
eprosartan			-1.98248		-1.98248
ERBB2	0.971475	2.73733	3.43874	5.37891	4.30532		0.947118	1.34358	2.77064	1.91236
ERBB3	-0.139724	-0.922603	0.324971	-1.36083	0.421998		0.380521		-1.45651	-0.457144
ERBB4	1.43534	-0.037134	1.11916	1.23011	0.832272		-0.433555	-1.2985	-1.36438	-0.62474
EREG		0.585206		1.19208
ERG	0.880366	-0.0314814	-0.184115	2.52357	2.70571		1.34164	-0.164399	-0.819288	1.50756
ERK	3.8034	2.92309	2.81251	3.25353	4.5213		3.56054	1.82145	3.47088	2.44372
ERK1/2	2.97397	3.03928	1.59316	2.08424	3.64551		3.50403	2.56227	3.27885	2.77146
erlotinib			-1.9625	-1.74658	-1.9625				-1.98443
ERN1		-0.0352454	-1.97648		0.907031
ERP29					-1.37199					-1.04407
ERVW-1	-0.191663	0.0561656			0.0561656
ESR1	-1.08689	0.86236	2.12449	1.52806	4.18052		-1.34206	-0.625555	2.10391	1.90652
ESR2	1.91437	1.33961	-0.165614	0.13292	-0.679922		1.44115	1.15621	0.621483	0.574485
ESRRA		-3.41534	-2.71978	0.632456	-1.06189				-2.4327	-2.13719
Esrra		-1.30544	-1.51992		-1.61764				0.213201	-0.512989
ESRRG		-2.9324	-2.38288		-2.67088
estradiol benzoate	0.385866	0.751499	0.662931	1.91237	0.330584		2.07684	1.30863	-0.502817	1.72006
estrogen	0.489898	3.27947	2.59909	3.02389	3.19542		2.59716	0.273079	1.45947	1.04047
estrogen receptor	-2.0204	1.76492	0.431604	-1.14698	-0.202771		-0.841239	-0.950654	-0.336935	-1.19544
etanercept									-2.23607
ethanol	0.0119545	0.914407	1.12251	2.48567	2.75934		1.1952	-1.59791	-0.716452	-1.00732
ethidium			-2
ethionine		-6.53198e-17	1.83478	2.15666	2.00832
ethyl pyruvate	-0.5547			-0.478091	-1.67332		-1		-1
ethylene glycol tetraacetic acid	-1.446	-2.41512					-1.94145	-1.94145	-1.57174	-2.18282
etoposide		1.88002	1.12735	1.86235	0.518172				0.811107
ETS1	0.903706	0.49853	1.59714	2.12419	1.35021		2.05452	0.0540313	2.23616	1.12481
ETS2	0.581351	1.15841	-0.267091	1.55415	1.53158		2.41234	1.08197	2.13554	1.35553
ETV1		-0.20795	-0.0922531		1.70588				0.185695
ETV4	0.964234	-0.067131	1.76001	2.39495	1.52025		0.396369		2.17152	1.3618
ETV5		-0.5547	0.239046	2.15918	2				2	0.447214
ETV6		-0.447214
everolimus		1.09545	-0.377964	-1.34164	-1.25357				-0.27735	-0.727607
evodiamine				-2					-1
exenatide	1.06749	-1	-0.294118	0.842484	-1.06715
EZH2	0.816714	1.58569	-0.353341	-1.08292	0.791304		-0.0480569		1.9897	0.441726
EZR		-0.973329	0		1.96396
F10	1.83566	-0.168252	-1.52997		-0.270719		1.99323			1.49772
F2	4.16186	3.0283	1.65889	3.87771	5.61904		3.58883	2.28946	3.58983	3.95194
F2R	2.44614	2.46169		1.18709			3.37992	1.97252	2.57876	3.24985
F2RL1	1.60074	1.86254		1.02565	1.12858		2.41176		2.20043	1.96396
F3	0.905677	0.602135	-0.359874	-0.501255	0.05547		1.47059
F7	2.12812	1.93523			1.86713		2.59482		1.9658
FAAH									-0.152499
FABP2	-1.98248	1.03923	0.654654		0.282843
FABP4	1.19523	-0.213201	-0.562544	-0.640184	0				0.447214	1
FADD	-0.522233	-0.569803			0.662266			-0.928477
farnesol		0.311086	-1.09109		-1.03923
farnesyl pyrophosphate	2.20723	0.244851	0.244851	0.168497	0.915249		1.21387		0.842484	1.446
FAS	-1.40486	0.549885	0.0332687	-0.936445	-0.343675		-0.852364		0.0478456	-1.91173
FASLG	0.749287	-0.579284	-0.923381		0.22723		0.0394362
FASN	0.27735			-1	0.5547				-1.91237
fasudil	-0.134766	-0.170656	0.768767	-1.6468	-2.23423		-1.30931			-1.74113
FAT1	1.95962	1.11748	1.02006
fatty acid	1.72667	2.38929	0.220141	2.6785			2.57282	0.826084	0.620982	0.177328
FBN1	-1.43208	-0.518476	-0.872872		-1.38675		-1.98248	-1.98248	-1.98248	-2.21321
FBXO32		0.817624		-1.96116	-0.637993				0.664411	0.588348
FBXW7	1.25357	0.0830455	0.92238	0.341882	-0.463389				-0.242536	-1.13137
Fc gamma receptor	1.6003	0.734001			0.853053
FCER1G								1.98248
FCGR2A	1.9799						0.492366
Fe2+		1.34164		-0.27735	-1.34164					1.13137
fenamic acid	-0.923381	0.729325	2.93294	3.78636	3.06563				2.8	2.21839
fenofibrate	-1.58373	-1.89403	-2.35575	-1.5502	-2.772		0.835263	-0.05547	-0.915629	-1.17775
fenretinide	-1.84506	-0.33445		-0.0448561			-1
ferric ammonium citrate		0.132453	-1
Fgf	2.38563	0.40839	0.239983	0.896258			1.76174		1.93449
FGF1	0.824163	2.62794	0.552158	1.30586	1.42265		1.02454	1.27802	1.32345	0.132453
FGF10	1.31995	0.829228	1.79029	1.31995			2.6295		1.91237	0
FGF19	1.06749	1.38621	0.916559	0.146045	1.1717		-0.152499	1.56071		0.954314
FGF2	2.24166	2.02561	1.75118	2.59369	3.99078		3.80809	1.71589	3.21302	2.65651
FGF21	-0.553685	-1.61155	-1.81148	-1.05737	0.0136839		0.0678844	0.130189		-1.72039
FGF3		1	2		2
FGF4		1.2376	1.91237	0.27735	0.816497		0.5547		1
FGF7	-1.1002	-0.374341	0.0671913	-1.18126	0.844905		1.31579	0.130189	1.55585	-0.39002
FGF8			-0.759141		0.430775		-1.03479			1.91265
FGF9			-0.646997	0.239046	0.218218		0.650945
Fgfr	1	0		1.40556	2.19036				2.23607	2.2188
FGFR1		2.30277	1.84805	2.20113	3.22047			1.30931	2.42536	2.25144
FGFR2	-2.15889	0.579771	2.52493	0.431183	0.825029		-0.34641		-1.86944	-1.05982
FGFR3		-0.27735
FHL2	1.95962	-1.9868
fibric acid derivative			-1.94646
Fibrin		-0.816497	-0.447214		0				-1	-1
finasteride	1.06749	-0.640184	-0.341882				1.98248
fingolimod	-0.816497			-1.13389	-2.12132		-2
fisetin		-1.25357		-1.50111
fish oils					0.9135
FKBP4	0.848528			0.51267
FLI1	1.91005	0.486609	-1.76742		-1.11466				-0.27735	-1.73067
FLNA				-1.21268
FLT1		0.942809	0.218218	2.3094			2			0.377964
FLT3LG		2.42129	2.72534	1.33279	1.92545				1.05393
fluocinolone acetonide	0.816497	-0.301511	-1	0.301511	-2.12132				-1.26491	-2.12132
fluoride		0.132453	1.23091
fluoxetine		1.86294	2.0293	-1.3405	1.41283		0.464709			0.970143
flupenthixol	0.34641		-0.430007
fluphenazine	1.21268
flutamide	0.976092	-0.792118			-1.74939		-1.34164		-1.446	-1.96931
fluticasone	-0.213659	-1.81033	-1.09459	-0.322407	-0.213447		-0.273087		-0.922889	0.441659
fluvastatin		0.150721	-0.206435	0.287	0.229133		1.51859	0.908236	0.183639	0.52515
FMR1		0.492042	0.162244		1.00471					-0.417585
FN1	2.36342	1.44189	1.75046	3.27688	3.57747		1.75393		2.49745	1.51039
FNIP1		2.40757	2.40757
Focal adhesion kinase	1	-0.05547	0.61017	1	1.52632				0.775515	0.691564
folic acid		0.822981	-0.517859	0.824424	0.534076					1.92856
formaldehyde	2.14127	3.2248	0.350489	1.88982	2.11332		2.73146		1.90297
forskolin	2.52949	1.17859	0.448945	3.16592	1.96686		2.56656	1.25575	0.132461	1.33447
FOS	-0.382322	0.659515	2.50459	1.73415	1.33889		0.289847	1.53949	2.0079	1.0681
FOSB	0.749323	-0.614875	-0.146911	1.19452	-0.0136241		0.231714		-0.553849
FOSL1	-0.470028	-0.539886	2.08346	1.78474	-0.194898		-0.28373	-0.174151	-0.28373	-0.460232
FOSL2	1.13344	0.730153			-0.244851
FOXA1	0.505745	-0.320298	-0.970006	-1.60347	-0.616424		-1.00349	-0.294087	-1.86079	-2.08654
FOXA2	-1.52722	-2.13829	-1.33319	-0.857493	-1.11818		0.894737	-1.88207	-0.80829	-1.12858
FOXA3			1.76559
FOXC1	0	-0.493197	0.6		1.94145		1.06749		1	2.2188
FOXC2	1.49537	-0.414998	-0.624677	1.88513	0.830444		1.61342	2	1.39036	2.55371
FOXF1	2.2293	-0.709299								0.0949158
FOXL2	2.42949		0.364932	2.6264			2.48971	1.70023	1.83434	1.35802
FOXM1	-1.45424	0.469021	2.41493	3.56365	4.31908				3.22042	2.07932
FOXO1	0.255715	0.767687	1.16556	3.55952	1.50113		2.32118	0.0824786	2.90728	2.77239
FOXO3	-0.44901	-0.533384	-0.824122	0.220806	-1.27109		1.34308		-0.173129	-0.833088
FOXO4	2.55168	1.01961	0.448855	0.272268	-0.561296
FOXP1		-0.927173		-1.9868
Foxp1		0.254457
FOXP3	0.643381	-1.69099	-1.38344	-2.12132	-1.52405		-0.152499
FSH	1.00492	0.225998	-0.58388	1.39507	0.83416		1.25359		-0.0613196	1.2229
FSHB	0	-0.105952					1.16518	1.22462	1.22462	0.650945
FSHR				2			1.34164		1.4571
FST	-0.862044	-0.306961	0.0224049					-0.140411	-0.38829	0.159674
FTH1					0.872872
fulvestrant	-0.540655	-3.37241	-3.13521	-2.64822	-2.53769		-1.77051		-2.20492	-1.0022
fumonisin B1		-1.38675			-0.5547
FUT8		1.63299			-0.816497				-2
FYN							-1.58813	-1.15404	-0.4159	-0.0588235
FZD8		1.94936	2.13201	2.64575	2		-8.07806e-17			2.17663
GAB2	0.840941	0.655386		1.70588						1.15857
GABA	0.61017	-0.640184		-1	0.128037		-0.640184		0.152499	0.152499
GABPA		0	-0.341882		1.06749
GABPB1			-0.5547
GADD45A	-1.96865				-0.0561656
GAL3ST1	-1.04407	0.492366		-1.22462
galactosylceramide-alpha	-0.569803
gallic acid				-1.06749	-2.21321
gambogic acid		-1.63299	-1.34164	-2	-2
gamma-linolenic acid		1.13389	1.63299	1.63299	1.13389				1
GAPDH		-1.93449
garcinol	-1.88982
GAS6					2.41234
GAST	3.36112	1.078	0.637697	2.59696	3.06593		2.91683
GATA1	1.99003	0.351713	0.442975	0.213344	0.40845		1.5625	2.09837	1.50966	1.63756
GATA2	2.07872	-0.912226	0.920358	-1.67621					-0.96225	0
GATA3	1.26077	0.630736	0.690803		-0.827144		-0.213201	-0.475651	-1.41421	0.759144
GATA4	0.45525	-2.72547	-3.2415	0.384941	-1.13316		1.43245	0.213201	0.884652	-0.105736
GATA6	0.333364	-1.81956	-2.94155	-0.0251896	-0.314735		-0.535729			-0.916324
GCG		-2.07953	-2.19006	0.676123	-0.318609		0.538047			0.112794
GCK		2.359	2.14476		2.3353
GCS-100		-1.09109
GDF2	1.02099	0.508347	1.57648	-0.265709	2.5283			-0.816497	0.588348	2.33487
GDF9	-0.387601	0.897352	1.63719	0.100833	1.00137		2.20807	0.0538382	0.711643	0.900686
GDNF	1.06977	2.36471	2.07466	2.56138	2.90334		1.02012	-0.493197	1.48324	0.925534
gefitinib	-0.463699	0.592485	-0.440995	-0.502609	-1.27585		-1.00904		-1.50111	-1.50111
geldanamycin	1.42549	-0.790174	-1.28446	-0.996986	-2.61302		-2.15946		-1.06204
gemcitabine	-1.1767	-0.380801	1.50675	1.83534	1.49937				0.324161
gemfibrozil	0.886399	-0.805883	-2.09964							-2.2188
genistein	-0.7336	3.10497	3.03085	2.20519	0.809198		-0.746822	0.392019	0.213006	-0.297159
gentamicin	1.99987	2.5044	2.35163	2.60666	2.86283		1.60591		1.14708	-1.09109
gentamicin C	-0.707107		2.67261	3.5	2.32379				2.44949	2.12132
geranylgeranyl pyrophosphate		-0.630593	0.557086	-0.468521	1.15079		-1.73205		0.727607	1.09109
GFI1	-2.34521	-1.38711	-1.89914	-1.80392	-2.8778
GFI1B		-0.233805
GFPT1		0.5547	-1.06749
GH1	1.63019	2.30325	-0.777498	0.49905	0.677462		1.43971		0.848983	0.319491
GHR					0				-0.624695	-0.6
GHRH	0.419537							0.861156	1.02565	1.46056
GHRL	-0.269333	1.06952	0.658311	-0.829844	0.398216			0.606933	0.371656	1.39744
Ginkgo biloba		-1			-1
GJA1		0.657258		1.7804	-0.811534		-0.270719
GLI1	0.537781	0.280887	1.79425	2.85795	4.06545		2.01655	-0.213201	2.25215	2.33594
GLI2	-1.78737	-0.575462	-0.967724	0.282216	-0.19803				1.76505	2.00832
GLI3	-1.38675	1.446	-1.56134						0.57735
GLIPR2		-1.9799
GLIS2	-1	0	-2.44949		-2.64575		-1.63299	-2	-2.44949	-2.82843
GLP-1-(7-34)-amide		0.0321578	-1.19523	-1	0.972387			1.11915	0.313363	0.664364
glucagon	0.333333		-1.21296	0.632456			-0.447214	-0.447214		1.92916
glucocorticoid	0.772346	0.256037	0.241846	0.0149994	-0.803099		-1.12308		-0.0879651	0.96808
glucosamine		1.5787	0.498406		0.935775
glutamine		0.168967	-1.27494	0.492366	0.281946
glutathione		-0.413096	-0.968561				-1.96865	-1.96396	-1.67126
glyburide		0.218218	-0.447214				0.254457	0.624695	-0.156174	0.624695
glycerol	1.13137	0.390567	0	-1.13137	-1.06749					-0.152499
glycine	2.2188	1.41421	0.820303	1.13389	0.493473
glycochenodeoxycholate		1.9799
Gm15807/Hmgn5		0.447214
Gm-csf	1.02837	2.30227		2.38521	2.18901				2.16525
GMNN		0.727607	0.5				-1.13389
GNA12	1.38675	0.914232	0.561349	2.91162	2.55725		2.2188	-0.685994	0.727607	1.53897
GNA13	1.05337	0.725866		1.96396	1.9897		1.9897			1.9897
GNAI2					-0.18179
GNAQ	0.98387	0.376663	-1.02837	1.94145	1.16462		1.05337	1.05337	-0.0307583	0.09759
GNAS			-2.60702		-1.56844		-0.548254		-1.04404	0.31741
GNB2L1					0.861156
GNB3	1.27443	-1.51647			0.463428
GNL3				-1.43208
GNMT			1.13137		0
GNRH	2.31064	2.34573					1.99844			1.06378
GnRH analog	-1.29987	1.54919	1.94062	-0.192897	0.340634		-0.5		0.426401	-0.179605
GNRH1	3.55589	1.26593	-0.597199	1.86563	1.49982		2.59791	1.18355	1.45793	1.4414
GnRH-A	3.2973	2.70092	-0.295896	2.12046	2.4915		2.06824	1.03923	1.6	0.643885
Go 6976	-1.39036	-0.973329	-1.48	-2.23766	-2.37847		-2.60801	-1.43208	-2.04465	-1.42374
Go6983	-0.80829	0	0.431331	-0.650945	0.239046		-1.9799	-2.21565	-2.21565	-1.9868
GPC1	-0.650945	0.305505	-0.152106	1.11772	0.58788		0.762493		1.09109	2
GPER1	1.90443	1.66966			2.13719
GPX1		-0.345547	-1.23391		-1.93733
grape seed extract		-1.94145		-1.44115	-2.40192
GRB2	1						-1.94145	-0.447214	-2.13201	-1.72609
green tea polyphenol	-1.7841	1.00434	-0.281701	-0.136717	-1.11688		-0.956183	0.945611	0.218218	0.546869
GRHL2	0	0.816497	1.72609	0.447214	0.447214					1.1094
griseofulvin			1
GRM3			-1.16518
GRM5		-0.314347			0.0678844
GRN			-0.231714	0.12356
Growth hormone	1.21317	-0.131649	-1.56441	-0.294372	0.742793		-0.611002	-0.371647	0.00245248	0.0247121
GRP	1.84523	2.08468	-0.282719	0.463699	2.35595		1.9587	1.56665	1.92788	2.16755
GSC		-1	1.38675
Gsk3		0.814992	2.16639						0.923381	-0.101535
GSK3B	-1.88498	0.204036	0.9129	-0.749982	0.975375		-0.22493	-0.417585	-0.182462	0.973399
GSK690693		-1
GTF2IRD1							0.254457
guanidinopropionic acid	-1.99323	-4.24094	-4.57834		-3.62473
GW 4064		-2.2049			-1.99444		-1.05393			-1.42426
GW 5074		-0.927173
GW3965	-0.804878	-0.26811	-0.991987	0.222353	-1.44003		-0.760372	-0.908236	-0.396765	-1.17372
GW501516		-1.19199	-0.316785	2.22404	-1.1748
GW7647		-1.03479	-0.784465	-0.478091	-1.50966
GW9662	0.12639	0.900459		-0.579417	0.913304		-0.243243	0.76425	1.52113	2.05676
H2AFB3 (includes others)	-0.904534						2.44949	0.816497	1.13389	2.12132
H2AFY	-0.377964	-1.55406	-1.66667	-2.13767	-1.11688				-1.63299	-0.956183
H-7	-2.1056	-1.76218	0.476463	-2.35975	-1.6584		-2.19058	-0.766702	-1.53527	-1.06822
H89	-2.05191	-0.24521	-0.525222	-1.85092	-2.66453		-0.850195	-1.53946	-0.222368	-1.54895
halofuginone		0.393159	-1.74574		-2.61861					-1.9868
haloperidol	0.981789	0.142398	-2.79485	0.470419	0.832508		0.936283	1.25801	0.000774309	0.779329
HAND1		2.13767	1.19523
HAND2	1.35944	-2.08327	-1.89688		-1.96815
harmine		0.377964	-0.447214	-1.34164	-1.63299		0			-1.34164
harmol									-1
Hbb-b1	-2.12132	2.79478	2.23607	3.16228	3.31662				2
Hbb-b2	-2.12132	2.64575	2.23607	3.16228	3.31662				2
HBEGF	1.98248	0.338729	0.377964	0.787562	0.562544		1.34164
HCAR2			-1.13389	-1.88982	-1.34164		-1		-1.88982	-1.34164
Hdac	-1.61466	-2.54637	2.2086	-1.32007	0.638033		-0.712741	-1.3685	-0.119618	-0.666645
HDAC1	0.454699	-1.84386	-0.561272	-2.04069	-1.17489		-0.811534	-0.646997	-0.746371	-1.16073
HDAC2	0.67471	0.0644157	-0.367255	-0.574367	-0.254		0.128037	0.5547	0.388514	-0.179605
HDAC3	0.194054	-1.5024	-0.156136	0.06689	-1.42374		-0.478091	0.431331	-0.725866	-1.12858
HDAC4	-0.956183	-1.56709	-0.616316	-1.76505	-1.53897		-8.19954e-17		-1.1717	-1.94145
HDAC5	-1.05393	-0.142857	1.21226	-0.62474	0.552074				1.34164	-0.447214
HDAC6	2.3871	0.0469841	0.79873	0.152499	1.96974					0.650945
HDC									1	1
HDL	2.04185	1.91006	0.19268	1.46157	1.53669		0.475293		0.588191	1.74633
Hedgehog	-1.19523	0.3773	-1.16	1.21854	1.47959		-1.13137			1.19523
heme		1.23116	1.49032	1.12763	1.23116		0.943646		2.13965	2.35245
hemin					-0.960948		0.459592	-0.0142843
hemozoin		2.39317	2.39317	1.70941	2.77014
heparin	0.524034	-1.69106	-2.31651	-0.172774	-3.42506		-0.27735		0.707107	-0.933257
herbimycin	-1.96919	-1.76697			-1.67828		-1.70968	-2.18577	-2.39147	-2.39147
HES1	0.569212	-0.817751	0.041487	1.11566				-0.246183	-0.872872
hesperetin		-2	-2
hexachlorobenzene	0	0.0778499	2.1974	3.58219	2.52274		0.447214		2.44949	1.41421
hexamethoxyflavone		-0.746729
hexamethylene bisacetamide		-0.571739		-0.159674	-0.471188
HEXIM1			0.246183
HEY1		0.266123
HEY2	-0.422663	1.84124	1.82817	0.133464			-1.09109
HGF	2.97156	4.25836	2.65269	5.91098	5.92414		3.89745	2.12829	4.43366	3.24862
HIC1		-0.11944	1.12115				-0.447214	-0.447214	1.09742	-0.0657952
HIF1A	1.68519	-0.00585267	0.990115	3.24671	3.05679		2.56697	1.25229	0.434139	2.02281
HIF3A		0.900366	0.327625						-1.13137
HIPK2	3	1.57229	2.16366	0.388514	0.971286			1.34164		1.50156
Hist1h1a		1.1767	1.51186	0	1.60357			-1.63299	-1	1
HIST1H1T		1.1767	1.51186	0	1.60357			-1.63299	-1	1
histamine	1.62404	3.06625	-0.697135	-0.0535206	1.52074		1.58459	0.91211	1.82998	1.25088
histone deacetylase	0.447214	-1.89737	-2.12132	-1.63299	-2.12132		-0.816497		-1	-1
histone deacetylase inhibitor					-1.19523
Histone h3	1.98248	0.650945			0.282843
HLX	-0.8	-1.08012	-0.766965	-1.4	-1.67126		-1.38675	-0.896258	-2.15455	-1.02565
HMGA1	0.485815	1.57674	1.89268	2.63105	2.2287		1.44596	0.665912	3.16849	3.09108
HMGA2			1.446		1.15404
Hmgn3	-0.5547		-2
HMOX1	0.268392	0.425847	1.16427	0.120313	-0.33952		-1.33446	-0.0805663	-2.07325	0.195442
HNF1A	-0.790451	-1.19965	1.02774	1.09184	0.93714		-1.58781			0.143437
HNF1B	-1.39961		0.431741	0.357034	-1.37251		0.139724	-0.101535	0.718421	-1.05792
HNF4A	0.113168	-1.84214	-1.84063	-0.740099	-2.56293
HNF4α dimer			-0.0923514		-0.900366					1.23502
HNRNPA2B1			0.624721
HNRNPAB		-1.40556	-0.624695
HNRNPK	1.06715	0.202276	-0.704976	0.32323	1.00859				0.970143	-0.113961
homocysteine		1.0688	-0.525757	1.21863	-0.474644		1.7204		0.113961	-1.2212
honokiol	1	-0.149071	-0.928477	-0.522233	-0.522233			-0.6	-0.6	-0.6
HOXA10	-0.676014	-0.970431	-0.940201	-0.257987	-0.103074		-1.09109	-0.447214	-1.92916	-1.50675
HOXA5	0.228086	0.817624
HOXA9	-1.98973	0.0170227	-0.199471	-0.265716	-0.246488		-0.447214	-0.816497		-0.377964
HOXB13				-0.478091
HOXB4	2	1.34164		0.447214	1
HOXB5	-1.09109	-1	-0.152499		0					0.6
HOXB7				-0.130189
HOXC8	-0.816497	0.333333	-0.213201	-1.13389	-1.66667		-0.447214			-0.447214
HOXD3	1.05393	-0.263158	-0.307794	1.77457	2.13201		1			1.80839
HR					2.44949			1.09109	-0.6
HRAS	1.10281	2.06445	2.45937	3.3468	3.14676		2.76794	2.00979	2.16058	1.69291
HRG		0.928477
HSD11B1			0.727607		0.27735				-0.282843	-1.4771
HSD17B4			2.4327
HSF1	0.215091	0.279302	-0.154848	-0.22997	0.0926909
Hsp27	0.928477				1.47959
Hsp90				2.6295	3.12995		1.98248
HSP90AA1		-0.195309	-0.195309
HSP90B1	-1.94145
HSPA5				0.447214
HSPA9		-1.13389	0		8.07806e-17			0	-0.5547
HTATIP2		-0.159313
HTT	2.88745	0.688666	1.91818	0.859521	2.1858		0.81631	-1.54906	-0.585964	1.0665
hyaluronic acid	0.270234	0.596073	1.26387	2.01476	2.27746		1.12631	0.646997	-0.0327385	0.918211
hydrocortisone	-0.4938	-0.364741	-1.13602	-0.781018	-0.380433		-0.983176	-0.215666	-0.624338	-0.614754
hydrogen peroxide	1.79384	1.9645	1.25374	3.21492	4.04254		3.83466	1.13598	2.50651	1.79602
hydroxypropyl-beta-cyclodextrin		-1.91265	-1.44246	-0.852803	-1.40841					1.02968
hydroxyurea	-0.213201	1.83439	2.09095	2.55362	2.01046				0.185631	0.113961
hymecromone		0	1.34164		1
I kappa b kinase	-0.282843	-1.28745	-1.54604	-0.848528
ibuprofen	-1.11728	0.633244	1.05361	0.76053	0.165485		-0.883452	-0.282843	-0.038502	-1.03702
ICAM1	1.95228						1.95228
ID1	-1.19911	0.031477			1.59915		1.12309	0.403992	0.540586	1.86989
ID2	0.301511	-1.00514	-0.582162	-0.606977	-0.412082		0		-2.49615	-2.13809
ID3	6.03089e-17	-1.57793	-1.01144	-1.49974	-1.7693		-0.307794		-1.83478	-2.359
IFI16			-0.0824786	0.242536
Ifn	-2.0098	0.837971		1.91622	2.93103		1.93733	-0.243606	2.70449	2.54951
IFN alpha/beta			1.76505	2.43975				0.640184	2.13201
IFN Beta	-1.21541	0.945713		1.3961	1.9729			-1.81189
Ifn gamma	-1.21762	2.39575	1.19335	2.76462	2.70796
IFN type 1								-1.96396
IFNA1/IFNA13	-1.68439							-2.37777
IFNA2	-1.64859	1.35791	2.64038	1.95525	3.47733		0.1136	-2.71816
IFNA4								-1
Ifnar	-3.16228							-1.13389
IFNAR1	-1.75769	1.06996	1.07874	1.01949	1.21268			-1.23789	0.786152
IFNB1	-3.11757	-0.891908	-0.704823	0.0142465	0.248464			-2.08842	-0.889999	-0.913246
IFNE								0	0.128037
IFNG	-0.311335	4.21183	3.67835	5.57866	5.67162		2.27592	0.805301	4.32194	2.20086
IFNL1	-2.02939							-1.91127
IFNL2		1.13137
IFRD1	0.106	0.345547	0.172774	-1.50111	-0.341882
IFT57		1.94099	2.37289	1.06749	2.6295
Ige								0.684257
IGF1	2.80148	2.87101	2.48185	3.49541	4.00026		2.53896	0.553728	3.12861	3.42136
IGF1R	1.70755	-2.13898	-2.17391	1.06765	0.438471		0.703672	1.95962	-0.0533296	0.0618984
IGF2	-0.286171	1.59456	0.264607	-0.671691	-0.210806		0.628674		1.13195	1.81866
IGF2BP1	0	0.239046	1.13389	2.23607	2.53661					1.13389
IGFBP1		-0.339422
IGFBP2	1.47959	0.592999	2.30482	1.8783	2.85774				0.0504433	-0.550828
IGFBP4		-1.06749
IGFBP5	1.96116	0.57735	0.39736		1.58114
IGFBP7		0.493197	-0.928477	0.816497	-1.09322
IgG	1.45172	-1.00818	-1.92861	-1.55394	-0.836001		0.8827	2.2188		-1.34269
Igm		-0.137433		-0.59612	-0.956293
IHH		-1.02565	-0.538672	0.0588235
Ikb		-0.105925							1.70958
IKBKB	1.14174	1.68302	1.09553	1.23671	3.21378		0.970591	1.44311	1.93548	3.00977
IKBKE	0.2804			-0.4001				-1.15311	-0.647648
IKBKG	-0.811107	1.42381	0.411096	0.425922	1.42414		1.21854	0.676716	1.68421	2.6675
IKK (complex)		-1.34164
IKZF1	-0.852537	-0.775156	1.32839	0.76619	-1.03017		1.03479	-0.170251	0.534522	-0.197386
IL1	0.806147	2.86388	1.64951	3.05736	4.15495		1.84959	0.974238	3.33256	1.56526
IL10	0.0920345	3.18608	2.28296	2.39526	1.20769		0.43149	-0.476838	1.49704	0.0171613
IL10RA	0.503871	-1.47182	-0.995591	-1.6664	-0.655302		0.19245	-1.04257	-0.365397	1.34085
IL11	0.374429				2.18643
IL11RA	1.06749
IL12 (complex)	-1.43224	2.61254	1.35414	1.94218	2.92872			0.846352	1.91074	2.72674
IL12 (family)		-2.05773
IL12A	-0.730409	1.19287			0.921395
IL12B		1.84669			2.74829				1.9799
IL13	0.825854	-1.01377	2.20158	2.09155	2.47045		3.67935	2.08673	2.57188	2.55832
IL15	-0.0692054	0.58848	1.55931	2.40208	3.80939				0.3439
IL17A	-0.330484	-0.10225		0.646512	1.75312		1.08554	1.85904	1.03312
IL17RA			2
IL18		1.08783			3.20687
IL19		1.71957	1.71957	2.41404	1.71957				1.19452
IL1A	2.39398	2.66882	2.24159	3.33873	4.1125		2.68784	2.56818	3.24678	2.91354
IL1B	0.690922	3.27166	2.3189	4.08001	5.80208		3.78964	2.22217	3.87666	2.82664
IL1R1	1.82243	2.21201		1.94168	2.92288		2.38956		2.18601	2.18601
IL1RN	1.25083	-1.79677		-0.868286	-3.28929		-1.25471	0.263158
IL2	0.105941	2.99205	2.6038	3.95591	3.91537		1.9308	0.999045	1.94751	3.36476
IL21		2.44284	2.08654	1.92204	2.75231
IL22	-0.800198						0.478091
IL23	-1.09109			2
IL24				2
IL27	-0.128971	2.38146		2.47752	2.6066		0.162605
IL2RA	2	2
IL2RG					-0.262613				0.185695	-0.156174
IL3	2.96824	2.95679	1.06151	2.32949	2.59244		2.94969		1.01174	0.586755
Il3					1.23407		2.20876	1.07763		1.50432
IL31		-2.23607	-0.478091	-0.896258	-1.19523
IL32	0.344933	0.703041	2.17663		2.57215		1.40841	-0.128037
IL33				0.971897	0.804654
IL4	0.834114	-0.382313	1.91647	2.72886	2.77075		3.25033	1.8746	3.34001	2.69164
IL4R	0.27735
IL5	1.64985	3.24709	2.48404	3.82938	4.83027		4.0099	2.89643	4.19372
IL6	1.41357	2.82146	2.04383	3.23193	4.01431		1.61847	-0.152273	3.46481	2.54103
IL6R	1.28685	0.629308			2.22535		1.39373		1.97034	1.31601
IL6ST	1.21854				1.75096		0.6		0.5547
IL7		0.29673	0.629619	0.365534	1.24708		0.516825	0.816968	-2.2711	-0.0461757
Il8r		-0.80829
ILK		1.46481			2.78235				1.95432	0.579284
iloprost	-1.4
imatinib		-0.578567	-0.905259	-1.21851	-2.04563		-0.152106	-1.13137	-0.871938	-0.610429
imipramine		1.29987	1.86276	0.757937	-0.926367					0.447214
imiquimod					2.24474		1.06878	0.178965	1.76073
Immunoglobulin	-0.268855	-0.625154		-1.39379	-1.94463		1.25093	0	-0.0968751	-0.542351
IND S1		0.377964	0.333333		0
IND S7			-0.333333		-0.333333
indican	-0.6	-0.921635			-2.20043		-2.2188	-1.98248	-1.06749	-1.98248
indirubin	-1	-0.707107	0	-1	-1.34164
indomethacin	-1.41755	1.94406	1.80213	3.53543	0.74946		0.115914	-0.0124505	1.82252	0.17331
infliximab	-1.49241	-2.18187	-1.87171	-1.77176	-0.57735		-2.44949		-1.58526	-1.13389
INHA	-1.17489	1.20382	0.143824	-1.03505	-1.19957		-0.821297	-1.3403	-1.30342	-1.48865
INHBA	1.15469	0.230103	-0.197426	1.80205	2.28919		1.0406	-0.0183584		1.34616
INHBB		1.43208
inosine	-0.787562	1.97389	2.6786	2.46463	3.19697		-0.103975	-1.96396	2.7347	2.74921
INS	0.90418	1.37106	0.0479319	-1.8489	1.52059		1.48955	1.75725	-0.256215	0.11732
Ins1	0.788289	0.683105	0.956078	1.24269	3.49469		2.8627	1.06479	1.77441	1.69156
INSIG1	0.885158	-1.92395	-1.54715	-2.06513	-3.8124			-0.896258	-1.61709	-0.91348
INSIG2			-0.365148	0.675088						1.95083
INSR	-0.24214	-4.4088	-5.36269	0.241524	-3.21868		-0.842484	-0.948052	-0.659699	-2.00216
Insulin	2.1437	1.99449	0.190502	1.40607	1.77241		3.11909	0.990974	1.27269	0.231518
Integrin	1.09109	1.51647	0.105118	0.958315	1.57676				1.96116
Integrinα				-2	-2
Interferon alpha	-1.30342	1.59913	2.56227	3.28196	4.01364			-2.06901
interferon beta-1a		0.83054	0.83054
ionomycin	1.45115	2.13161	1.14103	1.85706	3.82463		2.31218	-0.196493	0.605583	-0.471067
IPMK	1.94895	0.883452	-0.176471	2.23607	1.91404		1.95083		1.95083
IRAK3		1.90133	1.90133		1.34164
IRAK4	0.798584	-1.53484	-0.935674	0.152499	0.152499
irbesartan	-0.894825	-1.09545			-2.42536		-2.2188	-2.18282	-1.94145	-1.96396
IREB2		2.19977			1.97438
IRF1	-1.41491	0.214658	1.55471	1.92488	3.37886			0.0310804
IRF2	-0.856666	-0.323431	-0.894464	-1.72328	-0.745305			0.0218166	-0.632681
IRF3	-2.25556							-2.49198
IRF4		-0.819618	-1.86648	-3.89756	-1.98769				-0.840857	-1.03892
IRF5	-1.94737							-1
IRF6	-0.13403	-0.0428353	-0.659699	1.03838	2.41659		1.9868	1.4771	1.96396	2.21565
IRF7	-3.0458		2.24395					-1.82453
IRF8	1.02869	1.93646	0.250424	0.605927	2.15301		2.63661	1.76491	1.84768	1.25466
IRF9		-2			-1.34164
Irgm1	2.2188	-3.05329	-3.86023	-2.68804	-3.72857				-2.33126	-3.14757
iron		-0.710293	-0.491916		0.35974			0.746729	0.417585	0.215899
IRS1	1.25242	2.03498	0.848542	1.06597	1.36156		1.29019	0.411685	0.291985	-1.1085
IRS2		1.23917	1.97169	1.49613	2.16324		1.96974	1.2356	0.83054	-0.367884
ISL1	-0.795432		1.98248				0.103695	0.727607	1.43674	0.250943
isobutylmethylxanthine	1.10097	0.887524	1.55363	1.74608	1.53184		0.397294	0.732638	0.00396079	-0.375969
isoflurane		0.2
isoliquiritigenin	-0.958315	-1.17833		-0.622543	-1.99725				-1.15404	-1.15404
isoprenaline	1.4	0.6	-1.96396				2		0
isoproterenol	2.38329	0.972956	1.46691	2.15247	3.45172		2.68269		1.53923	1.04113
isoquercitrin					2.2188					-1.38675
isotretinoin	-2.27755	-0.712775	0.171359	0.727046	-0.30658		-0.261099	-0.0743294	-1.3806	0.875
ITCH							-2
ITGA1	-1.06474	0.594089		0.242536	0.263158				0.650945	1.91237
ITGA2	2.21565			1.98248						0.80829
ITGA3	1.28571	0.339448	0.770943	0.940201	1.92741		1.98248	1.92741	1.92741	2.38992
ITGA4		0.2	0		1.09109
ITGA5	0.791432	0.0801752	1.86345	1.34804	2.46936			1.01498	1.47963	2.20541
ITGA6										1.04434
ITGA9		-1.19208
ITGAM	0.900366
ITGAV	2.13338	1.21587	1.89186	1.94572	2.73348		1.75096		2.18331	2.911
ITGB1	0.868713	0.0298792	0.25297	0.68005	0.78926		2.3198	0.914674	2.57942	-0.657516
ITGB1BP1		-1.99756
ITGB2		0.868922	1.41658				1.33719
ITGB3	0.678594	0.882146	2.19389	1.69759	2.22003		1.34479	1.45204	2.00651	2.94556
ITGB6		0.274571	0.766046		1.50715		1.96116			1.96549
ITIH1	0.970143	0.896258	1.38675
ITK		-0.0708881
ITPR1		1.06749	0.5547		0.128037
JAG1	0.27735	0.431331	0.646997	0	1.66448					0.650945
JAG2			-2.59554
JAK	-0.113961		-1.1094
JAK inhibitor I	0.447214								-1
JAK1	-1.66448
JAK2	-0.078319	1.30188		1.75532	3.32674		1.63359		2.1015	1.89564
Jnk	2.10542	3.17221	2.20314	3.21742	4.42305		2.75888	2.35356	3.95958	2.79162
JUN	1.44625	0.368645	1.94863	2.58277	3.2446		1.87913	0.0568523	1.45111	1.75686
JUN/JUNB/JUND	0.927173	0.492366
JUNB	1.65761	2.40725	1.41204	3.35986	2.56172		3.11188		1.48025	0.978068
JUND	-0.872872	0.201292	1.01865	0.76053	-0.127573		-0.536895		-0.569803	-1.13137
K+	0.666359	0.538999	0.6617				-0.776338		0.531564
K-252		-1.29399	-0.113961	-1.34164	-0.640184					0.5547
kaempferol	-0.896258	-1.91237	-1.66448	-1.38675	-2.2188				-1.98248
kainic acid	3.44107	3.03896	-0.0937821	2.2285	3.23824		3.48567	0.950972	1.5729	1.78219
KAT5		-1.34269	-0.167836	-0.282216	1.08643		2.23607
KCNIP3	-2.18643						-1.05279
KCNJ11		-2	-2		-1.34164
KCNK9	-0.365148		-0.710742				0.447214	1	0.447214
KDM1A	0.194257	1.77176		0.853206	0.112509		-1.1717			0.174078
KDM2B			0.293105
KDM5B	1.65835	-2.20109	-1.21078	-2.20511	-2.43616		0.926367	0.650945	-3.16895	-3.98994
KDR	0.80829	1.19523	-0.862662	0.130189	0.27735				1.1094	1.02565
KEAP1	0.246183	0.892698	0.557722	0.130189	0.153695		0.0628695	-0.152499	0.298275
ketamine	-0.433412	-0.304277	-0.362844	1.69775	0.388567		1.15417		-1.09027	0.863263
KIAA1524		1.80205	-0.569803	0.179605	-0.749532					-0.388514
KISS1	0.0628695						0.0628695
KISS1R	1				1		1.06749		-0.447214
KITLG	3.10047	2.2091	3.26037	2.50832	4.35298		2.03474	1.73722	2.54845	2.89536
KL			0.312814	0.231714					-1.9948	-0.958315
KLF1	0.617213	-0.296174		-0.83054
KLF10		2.18532
KLF11	-0.727607	-0.341882	-1.37692		0.727607
KLF15	-1.60512	-3.22425	-3.48808		-2.43326			-1.1717	-0.314485
KLF2	-1.43049	-1.11085	-1.00454	-0.958926	-1.71584		-2.32038	-2.07773	-1.62873	-1.53587
KLF4	-0.110609	0.633495	0.419463	0.229993	-0.018282		1.50853	0.499477	1.16587	1.26902
KLF5	0.918196	1.53025	1.61515	2.30326	3.65644				2.76185	1.87943
KLF6	1.06571	1.81395	2.57658	0.338933	3.09358		0.816157			1.2
KLF9			2.15018	0.40522					1.94477	2.16215
KMT2A	0.928477	-0.101535			1.23391			0.447214	0.816497	1.5667
KMT2D		0.844782	1.67812	2.07927	2.14446
KN 93	0.302614	-0.725866								-1.23091
KN-62	-0.896258	0.239046		-0.5547			-0.5547	0.762493	0.27735	-0.128037
KNG1	1.71685	1.24931	2.18621				1.97988	1.98629	1.98629	2.60613
KRAS	2.06558	2.22579	1.55224	1.13112	0.89859		1.26213	2.56273	1.37009	0.58401
KRIT1		-2	0
KRT17					2
KT5720		-0.5547		-1.06749	-1.38675
KT5823		0.084707			-1.00438				-0.218218
L-685,458		1.96974	0.246183
lactacystin	0.983912	-1.19958	0.11227	0.354342	0.086238		-0.211032		0.0477395	-1.52377
lactic acid		-0.27735	0.5547	-1.06749	0
LAMA2		-0.5547	1		-0.254457
LAMC1		1.6132	0.576018	-0.392232	-1.06715
Laminin	1.34834	1.31206	1.42285	0.619505	0.0791422		-0.64399	0.0505063	-0.670648	-0.102308
Laminin1			0.447214
L-arginine		-1.01801		-1.97252
latrunculin B	-0.152499
L-carnitine									-1.34164
LCAT			1	-1.34164
LCK	2		0.894737	0.5547					0.896258	0.5547
LCN2		2.0282			0.881362		1.9799			0.019996
L-cysteine					0.762493
LDL	1.50123	1.95561	1.48505	3.25514	3.05521		2.08095	3.15713	1.37403	2.2234
LDLR	0.256713	-0.510892	-1.25534	-0.0623177	1.19677				-0.641473	0.0678844
L-dopa	1.11724	-3.39521	-3.95759	-1.81443	-0.859432		1.32757	-0.14058	-1.03477	-0.439489
LEF1		0.967702	0.630593	0.654654	2.07387		-0.67828		0.0923514	2.16594
lenalidomide		-2.98708	-2.29106	-1.93733	-2.63187					-1.93793
LEP	0.492948	1.07693	0.283839	2.51236	1.9472		2.59327	2.95752	2.91928	2.90759
LEPR	0.246488	-0.0731599	-0.0120816	1.30287	-1.23625				-0.13484	0.153893
let-7	0.932839	-2.98455	-2.75125	-3.69624	-5.26728			-2.6295	-3.92513	-3.79767
let-7a-5p (and other miRNAs w/seed GAGGUAG)	-0.0850572	-1.8207	-1.9603	-3.08804	-4.20737		-2.2563	-2.35339	-2.59037	-3.79049
leucine	0.2	0.578947	-0.493197							1.09109
leukotriene B4		1.34694	-0.784987
leukotriene C4	2.23455	1.75536					2.44206		2.44206	2.22794
leukotriene D4	2.55402	2.96586	-0.423339	2.21201	1.91761		3.24417	2.39046	1.76798	0.681005
leupeptin		-0.314347		1.95432	1
leuprolide	0.978523	0.112422			0.116264		0.590554		0.762493	0.882498
levothyroxine	1.43779				0.125871				-0.390567
LG100268		0.907465	-0.651651	0.988972	0.750757					-1.98062
LGALS1	0.412336	0.0727153			0.769967		1.446			0.522233
LGALS3	-1	-0.137361	-0.968561	0	-0.121967		-0.440086	-1.2356	-0.875481	-0.579284
LGALS7/LGALS7B			-0.774758		-0.774758
L-glutamic acid	2.10955	2.26233	-0.514115	1.90156	1.9482		1.90779	-0.369025	1.94226
Lh	0.768631	0.40404	0.620227	1.37395	1.37061		1.90266		0.428485	2.03543
LHCGR			-0.118741						-0.471399	-0.0244211
L-histidine		-1.01143			-0.105925
LHX1	0.912871	-0.477334	-1.2051		-0.851257		0.426401		-0.213201	1.41108
LHX6		-0.293105
LIF	0.447052	0.0915894	-0.583598	-0.422684	0.961323		1.41384	0.0233882	1.83056	0.471452
LIN28A			1.96861		2.19046
linoleic acid	1.46674	0.0485025	-0.243778	0.2504	-0.138856				0.923381	0.485071
linolenic acid				-1.1717					-0.762493
linsidomine	0.850789	2.05242	0.215287	1.96974	0.997234		-0.322581	0.656891	0.320019	0.354839
LIPE	-0.928477	0.852805	0.167569	1.0276	0.540738				-0.405723	0.365148
lipid	-1.34164
lipid A	-0.6	1.43684	2.13683	1.92916	2.93991		1.06749		2.34521	1.70561
lipopolysaccharide	1.15705	6.43984	5.07783	6.55577	8.20779		5.53133	1.79001	5.1946	4.53524
lipoteichoic acid	-1.0655	1.08124	0.551028	1.6344	3.43787		1.83537	1.99052	2.57319	2.35258
lipoxin A4				-0.20795	-0.576018		-1.42266	-0.784465	0.160128	0.160128
lisinopril	-0.658505	-0.936484			-1.70968		-0.924017			-1.98248
lithium	1.13147	1.12684	1.00222	-1.08751	1.12502		0.686803	1.24779	1.15221	0.575922
lithium chloride	0.777322	2.48508	-0.693304	0.743824	1.8679		0.76053	0.35132	0.820242	0.736614
L-methionine	0.593732	0.811762	-0.835109	0.600284	0.518476
LMNA			0.440086
L-N6-(1-iminoethyl)-lysine		-1.15855	-0.824464	-0.38683	-1.15855		-1.06749
LNX2		-1.9799	-1.9799
lomustine	-1	0.727607	3	3.77124	2.99813				2.82843	2.11058
lonafarnib				-1.95083	-0.593732
losartan potassium	-0.54343	-1.69908	-1.20042	-1.65429	-2.4831		-2.33105	-2.07344	-3.033	-2.53503
lovastatin	-0.74466	0.133817		-0.23157	0.242682		-0.57777			-1.37149
LOXL2		-0.152499
L-phenylalanine		1.06749	1.06749		1.38675
LPIN1	0.775515	-0.288009	-0.519875	-0.842484	0.746729				0.746729
LPL		-0.872357	-1.49741		-1.58424		-1.06749
LRAT	-0.27735	0.447214	1.21268		0.727607				1.21268	0.242536
LRP1	1.98248	2.61491		1.69775	0.80829				1.23091	-0.650945
LRP5		2.13767	1.13389		1.91237
LRP6		0	0.128037	-1	-1
LRPAP1		-0.5547			-0.248551					-0.248551
L-serine					-1.27891
LTA	2.64575		2	2.44949
LTB4R			0.492366	1.13137	1.4771
LTBP1	-0.220863	0.341882
LTBP4		0.927173	0.67245		-0.132453
LTBR				0					0.816497	1.98248
L-triiodothyronine	-0.20461	-1.14806	-1.85438	0.28843	-1.99744		0.418817	0.102089	-1.41899	0.0884312
L-type Calcium Channel		1.9799			1.9868
luteolin	0.536895	-0.206021	0.949653	0.943456	-1		-0.775515	-0.775515	-0.447214
LXR ligand-LXR-Retinoic acid-RXRα	-0.882498			0.810767
LY294002	-3.01859	-3.52544	-3.306	-5.21427	-6.50322		-4.97946	-1.51594	-3.84905	-3.37777
LYL1	1.10265	-0.0923514		1.9799
LYN					-0.346128
lysophosphatidic acid	2.61655	1.88948	1.10423	1.78824	3.16108		2.81916	1.65424	2.40556	2.57022
lysophosphatidylcholine	0.932589	0.538424		0.632681				0.370739		-0.0218166
MAF	2.00566		-1.01865				-1.34164	0		-1.1094
MAFB	1.17833	0.387601	0.693444	-0.730153	0.749269		-0.113961		0	-0.104828
MAFG			0.746729	1
MAFK		0.486908		0.5547
magnolol	0.958315	-0.622543			-1.55757
MALP-2s	-0.467606								1.95962
MALSU1		-2.23607	-2.23607		-2
MAML1	1.13137	-1.74658							0.848528	1.06749
maneb				1.66667	2.52982
manganese		0.27735	0.640184		-0.152499
mangiferin		-1
mannan				1.95962
mannitol	-0.51797	2.37543	0.743128	1.1209	1.92154				0.817624	2.44949
mannose		0.816497			1
manumycin A		-2.2	-2.40098	-2.2	-1.4					-1.96396
MAOA			-0.455803
MAP2K1	2.88842	2.24262	0.599042	2.61223	4.229		2.8936		1.42218	1.27141
MAP2K1/2	3.07868	1.24755	-0.508522	1.80053	1.41372		2.79762	1.70588	2.75627	1.36895
MAP2K2		0.585206	0.220863	1	0.585206
MAP2K3	-0.581318		1.1547	1.51161	1.59094		1.63299	2	2.23607	1.2376
MAP2K4	2.76574	1.20546	-0.489424	1.37972	3.28634		2.40114	1.45521	1.70941	0.419916
MAP2K5	1.76185	1.07374	-0.244618		1.25275		1.23091		0.246183
MAP2K6	-0.369406	0.657258	1.33081	0.5547	1.48149					0.762493
MAP2K7	1.40556	1.7085	-0.290284	1.10265	1.38675
MAP3K1	2.75973	3.39022	1.65108	1.55163	3.6649		2.77132	2.60191	3.10324	2.13095
MAP3K14		1.51274	2.88298	1.97577
MAP3K3	1.96116	0.169031	-1.1767
MAP3K4			0.152499		-2					-1
MAP3K5		1.98248	1.98248		2.2188
MAP3K7	-1.23502	-2.03584	-1.27145	-1.56764			1.36438	1.03264
Map3k7	1.82243	-0.168712	0.950748	0.645311			1.55112	0.640184	1.98973
MAP3K8	0.565326	1.67513	-0.544586	0.814345	0.196347		-0.619987		-0.0791808	0.0410651
MAP4K4		4.83647	5.3736	0.57735	2.55604					1.1767
Mapk	2.12237	1.16342	0.439847	2.1407	2.67268		2.03535	1.05963	1.5469	1.47391
MAPK1	2.80949	2.09435	-1.36653	-0.022698	-0.0850534		2.63359	2.81445	1.50911	2.31784
MAPK10		0.764706
MAPK11	1.62381	1.12858	1.18818	0.684509	1.74416		1.66448	1.98248	2.1776	1.38675
MAPK12	2.61281	1.99655	0.637793		1.99725		0.0830455		0.622543	0.228086
MAPK13	2.21565	0.80829			1.73205				0.848528
MAPK14	2.23923	1.25731	1.06054	2.54575	2.83903		3.30534		3.02052	3.18128
MAPK3	3.53815	3.04589		2.39147	3.04589		2.93246		2.76268
MAPK7	1.93449	2.41813	-0.682378		1.93733		1.45521		0.5547
MAPK8	1.82186	1.7203	1.7951	0.757822	3.56357		1.59288	2.35653	1.85666	1.86231
MAPK8IP1	-0.771389
MAPK9	1.11056	0.226417	1.15806	-0.159111	1.36997		2.92735	1.82321	2.19881
MAPKAPK2	0.479022			0.436564	1.86254
MAPT	1.19523	1.66667	0		0.956183			1.10265	1
MAT1A	-1.17112	-2.36657	-0.590785	-0.350931	-0.666627
MAVS	-1.92605							-1.38675
MAX	1.19523	-2	-0.078811	-0.970143	0.62115		0.447214		0.5547
maxacalcitol					-0.927173
MB		0.927173
MBD2			1.42014	2.00778	1.64444			1.27443	0.902258	-0.109435
MBTPS1				-0.152499						-0.152499
MC1R			-1.73205
MCAM		-1.43208	1.06749		1.93557					1.9799
MDK			-0.152499
MDM2	-0.943456		1.24603	1.60009	0.585369		2.2188		2.39619
MECOM	1	-0.478091		1						0
MECP2	-1.08508		0.743828		0.533413					-0.376867
MED1	-1.9796	3.12912	2.86	2.94389	3.20092				2.59204	2.1581
MED13	2			-0.447214	-0.377964
MED28				-2.16768
medroxyprogesterone acetate	1.52813	-1.89433	-2.54879	-0.909759	-0.926768		1.53012		-2.05689	-1.7768
MEF2A	0.943456	-1.33272	-0.714517		-0.411765
MEF2C	-0.0112831	-2.05869	-2.56386		-0.871455				1.86011
MEF2D	1.13344	-1.52753	-1.59164		0.354914		0.152499		0.218218	1.09109
Meg3		1	1
MEIS1		0	-0.848939
Mek	2.82345	3.52252	1.30032	2.61963	2.49138		2.79795	2.99097	2.80469	1.4663
MEL S3		0.707107	-0.333333		-0.632456
MEL T1		0.447214	0.377964		0.447214
melatonin	-0.697183	-1.21421	-2.46165		-2.17985		0.701533
meldonium		-1.34164	-1.63299
meloxicam					-1.25728
memantine	0.232933				1.93023		-0.152499	1		0.5547
MEMO1		1.99725	-0.927173
MEN1	-0.185166	0.711068	1.32354	0.278323	-0.432139				-0.371647
MEOX2	-1.72532		-1.35294		-2.1581		-1.10265		-1.13389	-1.67332
mercuric chloride		1.12309	1.16518
MERTK	2.21321								1.96396
mesalamine	-1.96865	-0.647059	-0.730153	-0.417585	-1.38675			-0.0638877	-0.0638877	-0.0638877
MET	2.11058	1.44299	1.25248	2.89112	2.31502		2.62891	1.41177	3.44258	1.94426
metformin	-0.210156	-2.0689	-0.453791	-0.817547	-2.08574		-0.861458	-1.78227	-1.58515	-0.973014
methamphetamine	1.87251	2.30242	1.39657	2.06394	2.40421		2.43139	-0.0552811	0.0888024	1.22604
methapyrilene	0	2.26779	1.88982	2.98481	2.06474		1.88982	-0.447214	0.707107	0.534522
methimazole									1.96116
methotrexate	0	0.169849	0.112852	0.497519	0.776151		-1.22222	0	1.09109	1.21268
methyl methanesulfonate	0.567746	1.10883	-0.765387		0.254916			-0.882498
methylene blue		-0.390567			-1.38675
methylmercury		0.942809	1.5	1.94145	1.94145					0.301511
methylnitronitrosoguanidine		2.37009	2.57158		3.07932		1.40556		1.93351	1.14789
methylnitrosourea					1.9799
methylphenidate	0.988483	1.93712			2.38871		1.50614			1.1767
methylprednisolone	1.54889	-0.420595	-0.372456	2.5627	0.639454		2.82264	2.57719	1.43818	-0.57656
methylselenic acid	1	-1.066	-0.447214	-0.447214	-1.63299				0.152499
metoprolol			-1.34164	-2
metribolone	-0.250461	0.742714	2.01654	2.12741	2.59271		1.1755	0.164399	0.753371	1.57369
metyrapone			-2.2188
mevalonic acid	2.19338	1.01095	1.10788	0.381713	1.56754		0.533201			0.794181
mevastatin			0.910281	2.32312	1.94118					0.247839
MGAT3	1.06749	-0.27735	1.06749
MGEA5	-0.625543	1.62747	1.34386		0		-0.688247	1.1547	0.816497	0.426401
mGluR		-1.06749
MIA		0	1.057		2.23227					1.99725
MIB1		-2.41058	-1.97697
mibolerone		0.53187	1.38356	1.34804	1.9232					0
midostaurin			-0.30839
MIF	0.318836	-0.263198			1.45328			0.579284		1.28306
mifepristone	-1.21374	-1.62455	-0.670163	-0.394583	-0.252802		0.47415	0.702686	0.997311	-0.00432561
minocycline	-0.0623177	-1.36061		-0.942075	-2.59213		-1.1717
mir-1	-1.97632	-2.35326	-3.89	-1.00104	-3.23957		-2.2		-0.816968	-0.137361
mir-10		0.0605694			-1.86745		-1.95432
miR-100-5p (and other miRNAs w/seed ACCCGUA)					-2.19977
MIR101		-0.115857	-2.15555	-1.98248	-2.15555
miR-101-3p (and other miRNAs w/seed ACAGUAC)		-1.04567
mir-122		0.409821	-0.397227		-0.950586
miR-122-5p (miRNAs w/seed GGAGUGU)		1.31862	0.531504		-0.600782
Mir122a,b				0	-1
MIR124		-2.1554	-2.37577	-2	-2.18795		-1.20185		-2.16777
mir-124		0.126113	-0.727825		-1.35294
miR-124-3p (and other miRNAs w/seed AAGGCAC)	-1.1209	-3.57531	-2.98348	-3.13949	-4.18678			-2.62939	-2.75058	-2.1183
miR-125b-5p (and other miRNAs w/seed CCCUGAG)		-2.38471	-2.76803	-1.36662	-3.13217
mir-126			2
miR-126a-3p (and other miRNAs w/seed CGUACCG)		1.18792
miR-128-3p (and other miRNAs w/seed CACAGUG)			-0.795662	0.150027
mir-130		-2.18282	-1.94145		-2.17663
miR-130a-3p (and other miRNAs w/seed AGUGCAA)		1.05963
mir-132		0.990148	0.990148	0	0.103695				-0.152499
miR-132-3p (and other miRNAs w/seed AACAGUC)	1		-0.390567	0.0678844	-1.1717
mir-133	0.377964	-0.894453	-0.725713	-0.652753	-2.88743		-1.1094	-1.38675	-0.377964	-0.375
miR-133a-3p (and other miRNAs w/seed UUGGUCC)		-0.744322	-0.486956						0.0939383
mir-137		0.447214
miR-138-5p (miRNAs w/seed GCUGGUG)			-0.746729	-1.96865	-1.96865
miR-1-3p (and other miRNAs w/seed GGAAUGU)		-3.0277	-3.34239	-3.65925	-4.91427					-0.705106
miR-140-5p (and other miRNAs w/seed AGUGGUU)		0.0678844	0.0678844
miR-141-3p (and other miRNAs w/seed AACACUG)		0.615257	0.446473	0.445012	-2.08207		-1.32926			-0.824581
miR-143-3p (and other miRNAs w/seed GAGAUGA)		-1.95362	-2.19137	-1.44707	-2.38421
mir-145		-0.838551	-1.03181	-0.545564	-0.435726				-0.292452	-0.0614571
miR-145-5p (and other miRNAs w/seed UCCAGUU)		-0.996238	-0.672707	-2.57903	-2.52775		-1.60512		-1.54604	-0.959939
mir-146	-0.183639	-1.07581		-1.94895
miR-146a-5p (and other miRNAs w/seed GAGAACU)	0.69862	-2.31792		-2.51661					-2.81272
mir-148			-0.575514		-0.084707
mir-15		-1.28237	-2.74355
miR-150-5p (and other miRNAs w/seed CUCCCAA)					-0.996347
mir-155		-2.56977	-3.64438	-2.38688	-3.54939		-2.4004	-1.94012	-2.90697	-2.90957
miR-155-5p (miRNAs w/seed UAAUGCU)		-2.29774	-2.42337	-4.09546	-3.30365		-2.38785		-0.501691	-2.63144
miR-16-5p (and other miRNAs w/seed AGCAGCA)	-1.91005	-1.68197	-1.13609	-2.78921	-3.26311			-1.20942	-0.855337	-2.96617
mir-17		-1.60961		-2.61738	-2.16793
miR-17-5p (and other miRNAs w/seed AAAGUGC)		-0.257446	0.616068	-0.969301	-0.767002					0.436436
mir-181		-0.588348
mir-182	-0.128037	0.39736	-0.457936	1			0.242536		1.27581
miR-182-5p (and other miRNAs w/seed UUGGCAA)	0.80829	0.988847	-0.125767	2.13767			0.0561656		1.34404	-0.536895
miR-18a-5p (and other miRNAs w/seed AAGGUGC)		-1.9799			-1.98248					-0.927173
mir-19		-0.787758	0.0220809	-0.105925	-1.29627
mir-192		0.0451589	-0.852214	0.270147	-1.57335				-0.930663	-0.930663
miR-192-5p (and other miRNAs w/seed UGACCUA)		0.168086	-0.751439	-0.247598	-1.4671
mir-193			-0.654654	-1.38675	-1.93733					-1.98248
miR-196a-5p (and other miRNAs w/seed AGGUAGU)			-1.98877
miR-199a-3p (and other miRNAs w/seed CAGUAGU)		-2.19393		-1.95283	-1.95283				-0.911322
miR-19b-3p (and other miRNAs w/seed GUGCAAA)		0.492366	1.9799	1.9799					0.440086	0.0678844
miR-200b-3p (and other miRNAs w/seed AAUACUG)		1.34273
mir-203		-1	-1		-1.446
miR-203a-3p (and other miRNAs w/seed UGAAAUG)		-1.67317	-0.963338		-2.1693
miR-204-5p (and other miRNAs w/seed UCCCUUU)	0	-0.904534	-2.64575	-2.44949	-2.82843				-1.63299	-1.34164
miR-205-5p (and other miRNAs w/seed CCUUCAU)		1.9799
mir-21	-0.288044				-0.0530543
mir-210		-2.53242	-0.391801		-3.62329
miR-210-3p (miRNAs w/seed UGUGCGU)		-0.6	-0.185695		-1.09109
mir-214									-0.764476
miR-21-5p (and other miRNAs w/seed AGCUUAU)		0.225546								-0.828156
miR-217-5p (and other miRNAs w/seed ACUGCAU)		1.98248
Mir218			0.845364		0.132891					-0.157313
mir-218		-0.282843			-1.43208
mir-22									-0.694424
mir-221		0.463428			0.913915
miR-221-3p (and other miRNAs w/seed GCUACAU)										-0.307534
mir-223		3.05992	0.244339	2.43275	1.71037		1.73205	-0.707107	0.671345	0.632456
miR-223-3p (miRNAs w/seed GUCAGUU)		1.38675	1.06749
miR-22-3p (miRNAs w/seed AGCUGCC)		-0.218218			-0.218218
miR-224-5p (miRNAs w/seed AAGUCAC)			-1.06749
mir-23			0.112509
miR-23a-3p (and other miRNAs w/seed UCACAUU)		0.622376	1.14698		-0.659437
mir-24		0.326023	0.201619		0.809427		1.446			1.9799
miR-24-3p (and other miRNAs w/seed GGCUCAG)		-1.98668	-1.64263	-2.9395	-2.34222				-1.94145	-1.96396
mir-25		0.76053	0.552074	-0.576018						-0.5547
miR-26a-5p (and other miRNAs w/seed UCAAGUA)		-1.69879
mir-27	-0.41533	-0.232021	-0.419935	0.424178	-1.01705				0.989748	0.861156
miR-27a-3p (and other miRNAs w/seed UCACAGU)		0.964049		-2.61139				-0.0383201
mir-29	-0.0443528	-2.12132	-2.17442	-2.07716	-0.716177		-1.98877	0.0588235	0.476499	-0.488182
miR-291a-3p (and other miRNAs w/seed AAGUGCU)		-0.54637	-1.58025
miR-293-5p (and other miRNAs w/seed CUCAAAC)		-0.341882	2.13201	-0.478091	-1.66448		-1.66448		-0.152499	-1
miR-29b-3p (and other miRNAs w/seed AGCACCA)		-0.716172	-2.66592		-3.54201		-2.40098			-1.25484
mir-30	-0.130189	-1.99174	-1.9868					-1.9799	-1.23091	-1.69775
miR-30a-3p (and other miRNAs w/seed UUUCAGU)		-1.85421
miR-30c-5p (and other miRNAs w/seed GUAAACA)	-2.27163	-1.7755	-0.632784	-3.00325	-1.14708				5.29948e-17	-1.432
miR-31-5p (and other miRNAs w/seed GGCAAGA)					-0.883383
miR-320b (and other miRNAs w/seed AAAGCUG)	0	-0.404232
mir-33					1.20593
mir-34	-0.856684	-1.69774	-1.78572		-2.91462				0.0838444
miR-34a-5p (and other miRNAs w/seed GGCAGUG)	0.410365	-2.87773	-2.02948	-3.40906	-3.40872				-1.82436	-1.94039
mir-373		0.749527	0.310493
miR-483-3p (miRNAs w/seed CACUCCU)		0.0111741
mir-486					-1.4
miR-486-5p (and other miRNAs w/seed CCUGUAC)					-1.40841
miR-491-5p (and other miRNAs w/seed GUGGGGA)		1.13137
mir-515			0.117041
miR-7a-5p (and other miRNAs w/seed GGAAGAC)		1.67782			1.10334
mir-8		1.49628	2.20558
miR-92a-3p (and other miRNAs w/seed AUUGCAC)				-0.0923514
miR-9-5p (and other miRNAs w/seed CUUUGGU)					-0.746729		-1.15404
miR-96-5p (and other miRNAs w/seed UUGGCAC)			0.27735		-1.51977				-0.254457
misoprostol	-1
MITF	-1.8643	3.75548	4.72553	4.67023	5.45922		0.277114	-0.883399	3.04903	3.45854
mitomycin C		1.11189	0.115299	0.632456	1.27018		2.19036
MKL1	1.61344	0.245762	-1.56692	2.29516	1.52702		1.31488		0.38829	0.421998
MKL2	0	0.377964	-1.26491	0.816497			0			-1
MKNK1	0.727607	-1.09545	-1.34715	1.60591	2.44949		2.33333		-0.258199	0
MLXIPL		-1.0995	-0.471188	-0.28444
MMP1	1.4	-0.424337			0.691564		0.218218		1.15404
MMP12			2.2188
MMP14			-0.681623		0.764787
MMP2			-1.20942	-1.24517	-0.518321		-0.640184			-1.21268
MMP9	0.437741	-0.0444994	-1.72727	-1.28069	0.0951303		1.27581			-1.34164
MNT			1
monensin	1.06749	1.06749			-0.27735		1.06749			-0.152499
mono-(2-ethylhexyl)phthalate		-4.76915	-4.67572		-2.98893
monocrotaline					1.42014				1.37199	1.09545
monorden		0.937043
morphine	-0.459273	-1.09089	-0.839347	1.33927	1.56594		0.722951	0.103352	0.887952	0.18894
moxonidine		-1.04442	-1.04442		-1.4671
MRPL14		-2.23607	-2.23607		-2
MSC	-2.12132	-0.83205			0.57735
MST1	0.787888	-0.813063	-1.00702		-1.00702		-0.453513	-1.57491	-1.76394	-1.52997
MST1R		0.0561656	-1.96865
MSTN	1.48387	-0.124035	0.550348	0.707107	-0.58313		1.63299
MSX1	0.896258		0.329609							0.187317
MSX2	-0.434925	-1.92105	1.07729	0.451422					0.480129	-0.0690815
Mt1					-0.152499
MTA1	-1.00773	0.585575		-1.09914	0.89509				0.329627	1.76563
MTA3					0.776516
MTDH			-1.47989	0.293105	1.19531
MTM1		1.38325	1.30931
MTOR	0.229577	-1.55068	-2.42981	-1.99616	-1.48273		-1.86349		-0.675454
MTPN	1.75611	0.562032	2.61381	2.89879	4.57891		1.81071	1.98248	3.21159	3.50045
MTTP	0.380521	0.272268	1.45166	0.266123	-0.725866				-0.691564
MUC1								1.95705
MUC4		-1.58813			0.784465				-0.218218
MXD1			-1.9799
MXI1	0.0678844	-0.852224	-0.339432	-1.52197	-2.38219				-1.09109
MYB	0.69059	1.05869	2.79121	2.33651	3.65531		1.44983		1.65758	2.52043
MYBL2		1.25327	0.833525	2.14724	1.27399				1.86276	2.22834
MYC	-0.508442	0.305618	0.405905	1.39549	1.85645		1.78077	1.08358	2.15466	0.367576
MYCN		-0.0946231	-1.63219		-1.85578		-1.80967		-1.77647	-2.593
mycophenolic acid	0.780869	1.94485	1.68714	3.30486	0.879463		2.53421	0.816497	1.52941	1.19208
MYD88	0.0602179	2.45217	3.72924	3.00403	4.26168		2.89558	2.4368	2.80874	3.91872
MYF6			-2.20723
MYOC	0.797724	1.2637	1.37972	-0.152499	1.45521		0		-0.152499
MYOCD	1.54731	-2.21144	-2.1877	1.96548	0.427637		1.70807			0.770078
MYOD1	-1.08098	0.362718	-1.08867	0.836189	0.0179875		-0.023622	-0.478913	0.924021	1.72698
MYOG	-0.447214	-1.11772	-0.436564		-0.787562			0.685994		1.06749
MYT1		0.816497		0
N-(3-oxododecanoyl)-homoserine lactone					1.18792
N,N-dimethylsphingosine		-1.19452					-1.96396			-1.96396
N-[N-(3,5-difluorophenacetyl-L-Ala)]-S-phenylglycine t-butyl ester		2.64575	2.44949
N1,N11-diethylnorspermine		-0.283896	0.447214		0
n-3 fatty acids				1.52632				0.390567	-0.390567	6.39509e-17
NAB2	-1.57435	-1.68993	-1.22932	-1.4571	-2.15555		-1.96865	-1.94766	-2.17707	-2.17707
N-acetyl-L-cysteine	-0.981561	-0.643109	-0.212716	-1.9115	-2.03444		-1.57095		-2.32145	-2.26136
N-acetylmuramyl-L-alanyl-D-isoglutamine									1.95962	1.95962
N-acetylsphingosine	1.99757	1.44241			0.332417		1.95193			0.0239663
N-Ac-Leu-Leu-norleucinal	-0.0738227	0.0297878	1.45921	0.363922	1.01465		-1.99586		-0.359476	-0.831192
NADPH			-0.152499
NADPH oxidase	2.4327	2.35975	0.896258	1.98248	1.93733		1.98248	2	2.15666	0.816497
naloxone	-0.105386		-0.646837						-0.618916	0.641422
naltrexone	-1.23091			-0.390567
naltrindole					-0.152499
nandrolone		-1.06749		0.16873	-1.06749
NANOG	1.49241	0.258199			2.12132		2.23607	2
naringenin	-0.816497	-1.13389	-0.707107	0	-1.13389		-1		-0.447214
NCAM1	0.282843
N-chlorotaurine		0.746729		1.96865	0.746729
NCOA1	-1.35295		-0.344623	0.239046	0.4636		0.766046		1.51148	0.930484
NCOA2	0.341882	1.92916					0.956183	0.816497		2.12132
NCOA3	-0.358621	1.24314	1.34911	1.73462	2.34905		2.21052	1.99323	1.42335
NCOA6										-0.447214
N-cor	0	1.03479	0.388514	1.37281	-0.333333				-1.49241	-0.562544
NCOR1	0.27735	1.06165	1.22294	0.19803	0.431331		-1.06749		-1.06715
NCOR2		-0.746729			-0.536895
NCOR-LXR-Oxysterol-RXR-9 cis RA	-7.18311e-17		-1.02565	0.862662	-1.02565					-0.787562
NCR2	1.1094
NCSTN		-1.76112	-1.77176	-1.41421	-1.66667			-2	-1.63299	-2.23607
NDN		-1.19523	-0.5547	-0.896258						0
NDRG1	-0.0394362	0.996014					0.128295
NDUFA13		-2.23341	-2.23341	-2.43357	-1.81223				-2.21863	-1.98052
NEDD9	1.13389	-0.258199	0.258199	0.534522	0.534522		2.11058	2.33333	1.89737	1.26491
NELFB		0	1.34164		2.23607		-1			1.34164
nelfinavir		-2	-2
NET1			-1.98248		-1.98248				-1.98248	-1.98248
NEUROD1	-0.946931						-0.416746			-0.625355
NEUROG1	-1.26491	-2.13201	-1.41421	-1.29099	-1.60357		-0.707107		-1.26491	-2.11058
NEUROG3	0	-0.232147	2.21359	0.301511			-0.646997	0.512989		0.266207
neuroprotectin D1				-1.15404
NF1			2
Nfat (family)	2.77843	0.8142	0.464312				1.7085	1.95083	1.53436
NFAT5									-0.988483
NFATC1	0.440086	1.94472	1.88362	1.62577	3.37751		1.75641	2.18101	2.39858	2.37531
NFATC2	1.04027	0.560283	2.85526	1.36679	2.68326		2.91478	-0.44057	0.830465
NFATC3	1.49889	0.832644	0.244005	2.15918	1.33674		1.41177	2.15918	2.15918	1.49889
NFATC4		1.16518	1.45204
NFE2		-0.218218
NFE2L2	1.27682	0.0277629	0.0798436	1.92311	1.63547		-0.493963	0.289908	-0.674253	0.167917
NFIA		-1.74113	-0.390567		0.536895
NFIL3		0.25351	0.930964		1.15046					-0.146993
NFIX	-1.98248	-0.152499	-0.5547					-0.842484	0.0638877	0.417585
NFkB (complex)	1.27214	2.61722	2.09702	4.42151	5.71282		3.00814	0.695286	3.58755	4.68858
NFkB (family)		2			1
NFKB1	2.36061	2.62085	1.36171	2.73377	3.9177		3.48993	2.95789	3.01435	1.89342
NFKB2		0.754997			1.20301		1.70958
NFKBIA	0.716443	2.84967	2.07651	2.69166	3.2488		1.29694	1.69254	1.48604	1.87087
NFKBIB		-2.07813		-1.40841	-2.2188
NfkB-RelA	0.477104
N-formyl-Met-Leu-Phe		1.75297	1.45821	1.75297	1.75297					1.52594
NFYA	0.485071	1.69031	-0.0873704		1.12858				0.128037
NGF	0.96847	1.96574	1.31335	1.8922	3.64092		1.92102	1.13283	2.23337	2.18963
NGFR	-0.492366	-0.975964	-2.04299	-0.701934	-0.591608				0.314347	1.06878
niacinamide					0.426401		1
nickel chloride		0.293543	0.293543		0.293543
nicotine	1.29477	1.11293	0.293307	1.08762	1.4695		0.852429	0.977125	1.92571	2.34951
nicotinic acid	0.96225		0.612146						-1.88624
nifedipine	-3.05057	-1.32294	-0.793362	1.17485	-0.738945		-0.764706	-1.10265	-1.94118	-1.94905
nimesulide	-0.371391	-1.60009	-1.99174	-1.29987	-2.22834
nimodipine	-1.38675	-1.63299	0.447214	-1.34164
nitric oxide	2.54896	0.380442	0.468715	1.89447	2.1734		2.28074	2.19112	0.738133	1.2072
nitroarginine		1.78208	1.25676		1.91485		2.22378		1.28745	0.492366
nitrofen	-0.128037	-0.167836	0.777029
nitrofurantoin	1.19909	1.6732	3.56764	4.05081	3.41262		2.86731		0.0675737	-0.0701862
nitroprusside	0.625768	0.808305	2.0559	0.762578	1.33554		0.718126	1.60959	1.11063	1.04679
NKX2-1	-1.36319	0.502609	1.08553	-0.314347	-0.40254		0.754594	-0.794363	-0.868918	-0.24451
NKX2-3	0.428571	0.631547	-0.430954	0.492532	-0.148361		-0.916949		1.08866	1.78146
NKX2-5	-0.382224	-1.44661	-0.386576	-0.509175
NKX6-1	1.50614		-0.579284						0.746729	0.314347
NLRP12	7.18311e-17	-1.1767	-0.730297	-7.18311e-17
NLRP3	1.91237	-2.29539	-2.66371	-1.87219	-0.845154				-0.852803	-1.41421
NMDA Receptor	-0.112509			-0.308377	2.59053		-0.152499	0.27735	-0.152499	1.38675
NME1			-2.20128		-1.96865
N-methyl-D-aspartate	0.901712	1.23795	1.28408	1.41764	2.50372		0.563169	-0.533612	1.92209	2.46624
N-nitro-L-arginine methyl ester	-0.898884	1.73525	2.54446	1.55559	2.42191		-0.3708	1.05909	1.71178	2.29587
n-nitrosomethylbenzylamine		1.43208	1.43208	1.06749	1.43208
NO 1886		-1.66448	-2.4327	-0.152499	-2.6295					-1.38675
NOBOX				-0.447214
nocodazole	1.82818	0.864538	0.495174	0.621143	0.276885		1.33062		1.62732	-0.313953
NOD2	-0.294362	2.64881	1.06697	1.77053	2.11305			1.42101	2.362	1.13578
NODAL	2
NOG	-0.239046	-1.64485	-0.13194	-0.0588235	-0.474579		-2.2188		-0.727607	0.128037
nonylphenol			0.904534		1.66667
nordihydroguaiaretic acid		0.447214		0
norepinephrine	2.19326	0.658506	0.511512	3.13914	3.17315		3.42702	0.545845	0.904647	0.730143
Nos		1.73205			2.21565		1.13137
NOS1	1.10265
NOS2	-0.335682	2.01711	1.77934	0.526231	2.93653		0.983874	0.670478
NOS3		1.83238		0.437741						-0.738549
Notch	1.06755	-0.340138	-0.953809	1.85089	-0.50985		1.51647			1.09338
NOTCH1	-0.222692	-1.5905	-0.602602	-0.837451	-0.178757		1.69402	0.0356299	1.29184	-0.456289
NOTCH2		-1.80452			1.9799
NOTCH3	-0.956183	-0.156174	1.34164	1.3598	2.53546		1.1094	0	1.63299	1.49241
NOTCH4	-0.152499	-2.94904	-2.16025		1.34164				0.152499	0.152499
NOV	-0.396059	-0.431331	-1.13389		0.447214		-0.390567	-0.390567	-0.727607	-1.29399
NOX1		-0.201948	-1.95962
NOX4		-1.0594					1.1094
NPC1	0.911465	0.0171159	0.0823214	-2.02992	-0.918036			-1.95083		-0.174655
NPC2	-0.50549	-0.864028	0	-1.49137	-2.39619				-1.98052	-1.15404
NPM1							1.10265		1.10265
NPPA	0.494242				-0.101274		-0.294118	-0.691564	-0.494242
NPPB		-2.60801	-0.523225	-1.9799	-2.20366		-0.784465
NPPC		2.23607		1	1.34164
NPR1	-1.52358	-0.888106	-1.35931	-1.7085	-2.11187		-1.1717
N-propyl bromide		0.927173
NPY	1.98777				0.535656			-1.15311
NQO1	0.816497	-0.47036	0.474579	0.507673	-0.784465		0.762493	-1.446	-0.244851	0.27735
NQO2		0		1	0
NR0B1	-0.71781			0.265953
NR0B2	-1.17017	-0.398487	0.776713	-0.393046	0.668292		0.476999	-0.403658	-0.404894	-1.30059
Nr1h	-0.951541	-1.71084	-1.34368	-0.412486	-2.24733		-1.59532	-0.0829383	-1.50956	-1.71185
NR1H2	-0.495193	-0.2077	-0.517702	0.655279	-1.43707		-1.03923		-2.43067	-2.18844
NR1H3	-0.273046	-0.447324	-1.66683	0.461019	-2.00436		-0.0810108	-0.379645	-0.834253	-1.05743
NR1H4	0.431994		0.119937	-1.52016	-1.86709		-0.458774	1.57598	1.57201	-0.36068
NR1I2	-1.54303
NR1I3				0.594755	1.28817					1.50851
NR2C2			-1.50609		0.762493
NR2F1		2.21321	2.17956	1.9799	0.650945
NR2F2		2.79145	1.02837	1.15404	1.27992
NR3C1	0.231946	-3.24226	-0.965946	-0.794554	-1.51568		0.443754	0.382957	-1.00472	0.176396
NR3C2	1.29048	-0.744564	0.632456	-1.31132	1.32673		1.27581			0.914779
NR4A1	-1.20359	-0.0439401	-1.64079	0.320815	-0.648272		-0.707107		-0.58313	-1.17954
NR4A2	-0.136788		-0.709568		-0.986666		-0.440086	1.96861		-0.561951
NR4A3		-2.7926	-2.3475		-2.2168		0.5547		0.67402	-0.725866
NR5A1								-0.0936073
NR5A2	-0.501822		-1.79366	0.602169	-0.546826		-0.0670675	0.674318
NRAS	0.694424	1.2096	-7.35622e-17		0.314485		0.60539	0.694424	0.993533	0.190305
NREP	-1.16518	-1.08249	-1.19602	0.691564	-1.20593		-0.105925			0.152499
NRF1		-1.20861	-1.69759		-0.779844
NRG (family)			0		-0.816497
NRG1	2.7897	2.39955	2.80599	3.22212	4.74799		3.38743	1.69691	1.89031	2.84873
NRIP1		0.132453	1.56502	-2.41404	-0.686803				-0.2
NRL	-0.404061									0.483368
NRTN	1.40177	1.99756	0.425195				1.99756
NS-398	0.104599	-0.446724	-2.40368	-0.304353	-3.39119				-1.89792	-1.24681
NTF3	1.446	0.0448561	-0.646997		0.263158				-0.817303	-0.817303
NTF4	0.864923
NTRK1	1.66448	0.792058	-0.182171		1.16632			0
NTRK2		1.58978	1.06408	1.63755	3.20771		-0.557086		0.905551	0.185695
Nuclear factor 1		-1.00438	-0.83035							1.27347
NUMB		2.59238	1.94145
NUMBL		-2			-0.5547
NUPR1	2.59808	-2.16366	-2.84177	-1.46261	-2.8947		0.408248		-4.42857	-2.83235
obeticholic acid		0.031734	0.343316	-0.526897	-1.01923		-0.552532
oblimersen		-0.27735						-1
ochratoxin A					1.96865
octanoic acid		-0.691564		0.314347
octreotide	-1.15654				-1.94895
OGT		0.124035	0.384111		0.333333
okadaic acid	2.31406	2.47232	0.199053	2.31825	2.15339		2.57333	2.40788	3.01031	2.59398
olanzapine	-0.0598718		-0.582058	1.79578	1.18437		0.268029		-0.519725	-0.0852803
oleanolic acid	2			1.40556
oleic acid	0.882574	-0.753461	-1.95504	-0.610299	-0.870113			0.654654	1.10218	-0.87151
oleoylethanolamide	0.27735	-0.654654	-0.9135		-1
olmesartan medoxomil		-1.06749	-1.06749		-1.06749
OLR1		1.43245	2.72394	2.56161	2.16291		0.447214		2.21321	2.42536
OMA1		-1.63299	-2.23607		-2
omeprazole		-0.640184			-1				-0.848528	-0.848528
ONECUT1			1.96652
ORMDL3					0.775515
OSBPL8				0						0.447214
OSM	0.9812	-0.123049	0.942297	1.88562	2.10002		1.09487	1.25021	1.74915	0.145185
OTX2	-0.375919	-0.696441	1.23718	1.79605	2.89246		0.128037	-1.60074	0.159674	2.41209
ouabain		0.510252	-0.455557		0.721265
oxaliplatin		-0.0174005
OXT	0.251752	-0.942265	-0.0992292	1.07341
oxymatrine	0.5547	0.239046	1.13389	0.5547	-1.66448
oxysterol				0.50549	-0.69192
P1,P4-Di(adenosine-5') tetraphosphate		-0.447214	1.38675
P2RY14	0.447214							0		1.34164
P38 MAPK	2.53008	2.79928	1.32078	3.16664	4.43473		3.45652	2.13648	3.57827	2.78684
p70 S6k		-1.38675
p85 (pik3r)		0.761332		1.23081	-0.468361					1.13137
paclitaxel	0.834209	0.61313	-0.752451	1.08855	0.648753		1.67592	0.829081	1.71076	1.42939
PAF1					1
PAK1	1.19452	0.629133	-0.249583	-0.589239	0.23611		0.349094		0.848528
palmitic acid	1.45704	3.44685	2.03463	2.40898	3.10098		2.35836	2.24526	2.20001	0.991808
Pam3-Cys	-0.838088
Pam3-Cys-Ser-Lys4	0.414449			1.08679			1.98918		2.39248
panobinostat	1.97438	-1.2436	-0.463699							-0.688515
PAPOLA		-0.762493	-0.762493
paraquat		3.21479	3.5151	3.37935	3.87781		2.25265	0.840596	2.27777	1.4522
paricalcitol	-0.624695	-1.066			-1.66448
PARK2		1.30931	1.21854		0.816497
PARP1	-0.684651	-0.547292	0.320256	1.0016	1.40758				0.5184
PARP2		0.282843
parthenolide	0.467606	0.0185663		0.561644	-0.585769		0
PAX1	0.333333							-1	-1.63299	-1.41421
PAX2	0.370739		0.898807		1.69486		0.536895		-0.157313
PAX3	-0.27735	-0.868132	1.57741e-16	0.0628695	0.242536		1.15404		0.684762	2.20723
PAX5					0.912565			0.0678844	-0.48911
PAX6	0.695833	-1.3083	-0.42436	0.0411036	-1.63589		0.912321	0.439803	-1.01824	-0.10307
PAX7	-0.447214	-0.18368	0.404095	0.710742	0.314875		2.2188		0.447214	0.896258
PAX8		1.3205		1.86015	1.58196				1.39068	1.53008
PBX1			1.09109
PCDH11Y	1.98248	2.79977	0	1.93733	2.42536		2.2188			1.13137
PCGF2		-0.888418
PCK1		2.2	2.61116		2.2
pCPT-cAMP	1.42712	1.2464							0.28	0.28
PCSK1	1.02565
PCSK2										1.55414
PD 123319	2	2.52982	2.52982	1.41421	2.33333		1.34164		1.63299	0.707107
PD 153035	-1.98248	-0.727607			-1.1717					-1.98248
PD 180970		-0.927173
PD173074		-1.01587
PD184352									-1.38675
PD98059	-2.97114	-3.50252	-1.62463	-4.12222	-4.73292		-4.32861	-3.07663	-3.76199	-3.99706
PDCD1			-2.23607	-2.2
PDCD4	-1.98248	-1.38675
Pde	0	0.447214	1.34164		1					0
PDE5A		1.43208			1.38675
Pdgf (complex)	2.67276	3.85495	1.2638	2.75068	4.30227		3.26409	2.40997	2.93698	2.5609
Pdgf Ab	0.746729	0.167764		1.01205	1.97685				1.07601	2.57742
PDGF BB	3.22788	5.11271	3.09951	3.17421	4.55994		4.4289	3.81338	4.64069	2.2074
PDGF-AA	0.766046	1.18412	0.00567221				1.15404	1.1767	1.02899	0.420969
PDGFB	1.80452	2.25536	0.662225		2.21604		1.91495	0.786832	1.44658	2.16158
PDGFC		-0.970143					1.98248
PDGFRA		-0.282843
PDGFRB		-0.2
PDLIM2	0.301511		-0.377964	-0.27735			-0.707107	0.816497		-2.52982
PDX1	0.541197	-0.262947	0.387326	-0.0769231	-0.571503		2.30204	-0.0696921	-0.157511	-0.954893
PDZK1			-1
PEA15	1.06749
PECAM1		-0.842484								-1.15404
PELP1	0.447214	-1.13389	1.66667	1	1.66667		1			1
pentobarbital	-1.96807	-1.09339	2.21321
pentoxifylline	-1.02565				-1.63438		-0.5547			-1.38675
pentylenetetrazol	1.21496		0.270719
peoniflorin		2.41771			1.96116				0.882498
pepstatin			0	1
peptidoglycan	-0.315809	2.12051			1.55866		2.38119	2.38119	2.37519
perilla alcohol			-1.9799	-1.9799	-1.9868
perindopril		-1.05963	-0.393611		-0.707508		-0.449719
peroxynitrite		1.06749
PEX5L		-2.2188		1.1094
PGF		1.34164	2.64575	2.23607	2.23607				2
PGR	0.826934	0.338561	0.914676	1.94015	1.75159		1.13227	2.30224	1.91096	1.02936
PHA-666859		2
PHB2		0.128037	0.896258	0.128037	0.647059
PHC2			-1.9799
phenacetin	-1.19523		1.73205	3.13786	1.3598		0		1.98248
phencyclidine	0.0288182	-0.372897								0.946163
phenethyl isothiocyanate		0.872872			-1.38675
phenobarbital				0.745162	1.12631
phenylbutazone	-2.61861	-0.217072	2.79694	2.77746	2.24189				2.02031	1.85695
phenylephrine	0.83887	0.244089	-0.769719	1.83789	1.63124		2.20645		2.40909	1.95475
phenyl-N-tert-butylnitrone		-1.22454	-0.854242	0.149822	-1.22454		-0.854242
PHF21A		-1.97246
phorbol 12,13-dibutyrate	1.98457	0.0388857	-0.45385	0.475705	0.337216		2.1927	2.77478	1.9968	1.9968
phorbol 12,13-didecanoate	0.27735	-0.518476	-0.103695		-1.69775
phorbol esters	2.79746	0.244904	1.31923	1.93018	2.1885		2.42155	2.58456	2.76899
phorbol myristate acetate	3.17147	2.71376	2.64429	5.5632	4.80289		5.40085	3.7748	4.76936	2.97123
phosphate	0.301511	0.142857	0.571429	0.27735	-0.714286
phosphatidic acid		0.848528			1.9799
PI3K (complex)	1.89497	1.35277	2.25731	3.23781	3.4823		3.43938	1.88147	2.50781	2.91171
PI3K (family)	2.24411	0.600411	1.35116	1.31452	2.15287		1.67795	0.909395	0.39582	-0.108804
PIAS1	0.12356			2.58072	1.97697		0.117444			1.71499
piceatannol	-0.370739	-0.713714	0.0246108	-0.370739	-0.713714		-1.16518
picropodophyllin		-1.69775		-2						-1.34164
picrotoxin	-0.242536	1.70941	0.341882	0.848528	0.5547			1.06749	0.896258	1.93733
PIK3CA		-0.343616	0.842484		-0.651339
PIK3CG			2.23607				1
PIK3R1	0.101535	-0.0959785	0.82945	-0.388514	1.34479		0.923381	0.956183	0.845489	1.44857
pilocarpine		1.27017			1.60692
PIM1		0.544331	0.526152	1.97021	2.77784
PIM2			7.35622e-17		1.13137
pimagedine		-0.492693		0.296379	-1.09289		-2.62109	-1.9799	-2.42536	-2.21321
PIN1		0.350489	-1.22744	0.599171	-0.402445		0.156174
pioglitazone	-1.71705	-2.22091	-2.14782	0.196097	-2.01137		-0.997235	0.270006	-2.61936	-2.04291
piperine									-1.13137
pirinixic acid	-1.94724	-0.757343	-1.17111	2.10205	0.986325		0.173622	1.04978	2.05832	2.11543
pitavastatin	-0.933257	1.09984	0.669937	1.44761	1.75472					0.322045
PITX2	-0.717498	0.960719	-0.617008	1.16007	0.430427		-0.00580081	0.558647	1.30833	0.691184
Pka	2.45656	1.68915	-1.41055	1.77862	1.70499		1.2854	1.27043	2.20709	1.86809
Pkc(s)	1.18498	1.37712	0.649694	2.31979	3.09189		3.52045	1.56559	2.17337	2.51014
PKD1	-2.07591	0.812277	1.83702	-0.367884	-2.26918		-1.5462	-0.777029	1.5462	-0.0735215
Pkg	2.23607	1.88982	-1.19523		1.41421				0.762493
PKM			-0.704192		2.21315
PKN1				1.99756
PLA2G4A		1.2257	1.93557	0.522253	1.2257
PLA2G5					0.802538
PLAG1		-0.932828			0.874255		2.42536
PLAGL1			1.96946
PLAT	0.739471	1.92946	0.171993	1.18594	1.92946		2.36033		2.1409
platelet activating factor	2.25038	2.04232	1.72016	1.66909	2.62792		2.45408	2.57961	2.7744	2.77389
PLAU	0.245256	1.64691		2.33333			0.707107	-0.816497	2.44949	0.377964
PLAUR	2.20527	0.42053	0.201292	2.59673	2.10142				1.94895	2.19046
PLC	1.98248	2.2188
PLCD1			0.304604
PLCG1	-0.984732	-1.27017			-0.984732		-0.984732		-0.984732	-0.984732
PLD1		1.9868		0.390567	1.9799
PLD2	-1
PLG	1.89212	1.23479	1.33359	2.6422	2.46709		1.61068		2.15555
plicamycin	-0.160385	-1.72811	-1.85888	-2.79005	-1.41933		0.152499	-0.794067	0.199557	-0.328415
PLIN5		2.34521	2.53837		2.34521
PLK1				-1.45095
PLK2		0.377964
PML	-1.45048	0.760507	1.42885	-1.93991	0.956484					0.160904
PNN			2
PNPLA2		-1.60074	-2.35886		-2.60709
PNPLA8		1.10265	1.40556		1.10265
poloxamer		1.38675	1.98248		2
poly rI:rC-RNA	-1.65762	2.8569	2.85691	3.75217	5.29155		1.37219	-1.36628	2.14651	1.47403
POMC	1.83044	1.30317	-1.12971	2.06657	1.40364		1.62838	0.025664	-0.458444	1.78972
ponesimod	2	2
POR	0.61017	-0.881134	0	0.751068	-2.31941		-1		-1.93733	0.0452216
POSTN	1.71499	-0.11547	1.21387	1.44454
potassium chloride	2.6095	1.59078	-0.939782	0.592991	1.22078		2.75012	0.665831	0.415729	1.37433
POU2F1		-0.104828	1							-1.10265
POU2F2				1.98248	1.06749
POU4F1	-0.209942	0.0997234	2.43998	0.188621			0.019996	0.727607	0.683941	-0.40344
POU4F2			0.5547
POU5F1	1.61122	-0.535497	0.148028	-0.329269	-1.10702		1.30881	0.730153	0.115642	-0.632127
PP1	-0.923381	-0.332423	-0.0940721	-1.1767	-3.13222		-1.02565	-0.848528	-0.727607	-2.42536
PP2/AG1879 tyrosine kinase inhibitor	-1.89214	-0.698771	-1.19409	-1.31583	-2.29363		-1.85604	-2.42261	-2.76075	-3.09579
PPARA	-1.15828	-1.21752	-1.5005	1.63926	0.155054		2.14572	1.86471	0.0133358	1.11878
PPARD	-1.12953	0.323556	-0.211128	0.969612	1.49926		1.54324		2.09385	1.34794
PPARG	0.148273	-1.34554	-0.6908	1.03492	-0.867326		1.1336	1.08745	0.698667	-0.0670923
PPARGC1A	0.0255764	-5.5305	-5.34379	-0.0286461	-2.48859				-1.43654	-1.69883
PPARGC1B	-0.341882	-1.88305	-1.02825	-1.57897	-1.06206				-0.239046	0.390567
PPARα-RXRα		0.447214	-0.816497		-0.447214
PPBP		-0.927173			0.80829
PPIF	0	1.88562	1.04257	1.5	-0.229416				1.88982	0.27735
PPP1R14B		-1
PPP2CA	0.447214	-1.31995	-1.31995	-0.478091	-0.112509
PPP3CA									1.98052	0.958315
PPP3R1	0.447214	-0.377964	0.333333	-1.34164
PPRC1	1.41421						0.707107	0.816497
pravastatin	1.30715		-1.08981	0.0620059	-1.30715
prazosin	-1	-1.34164			-1.1094
PRDM1	-0.1972	-0.391124	-0.374291	3.84272e-17	-0.728809		-2.51305		-0.239153	-1.18138
PRDM5		2.44949	1
PRDM8	1		0.447214		-1
prednisolone	-0.895533	-0.786368	-2.09717	-2.70693	-2.63999		0.132453
pregna-4,17-diene-3,16-dione	-1.1209	-2.36692	-1.3976	-2.04322	-1.96815		-2.15555		-2.2188	-1.43208
PRKAA		-0.691588	0.306322	-0.764706					-0.197649
PRKAA1	-1.62964	-0.295141	-0.631933	-1.78118	-1.92055		-1.50966		-0.483494	-2.35393
PRKAA2	-1.99079	-0.656891	-1.31943	-2.51018	-2.3377		-1.06961		-0.50602	-1.6108
PRKACA		0.423972			0.0185663
PRKAR1A	1.01587	-1.91017							0.152499
PRKAR2B	-0.780869
PRKCA	0.0373457	1.1914	0.245855	1.98778	0.731801		1.68705	1.73205	1.24	0.798621
PRKCB	1.47865	2.38666	1.40233	0.738866	3.28386		2.40788	1.08087	2.20737	1.8844
PRKCD	1.0243	1.3913	2.43479	0.926367	3.22462		2.09655	0.640184	2.9007	2.40654
PRKCE	1.2888	0.361137	-0.128069	1.44474	2.72111		1.82953	1.9799	2.39457
PRKCG		-2
PRKCI		1.06749	1.31278	0.866667			0.784465			1.05099
PRKCQ					1.49214
PRKCZ		0.0500743	0.00871162	0.366727	0.930599		1.96056			1.2171
PRKD1		1.76212
PRKG1	-1.67332	-1.76505		0.128037	-1.11688		-0.956183	0.5547	-0.640184	-0.562544
PRL	-0.873005	1.08103	2.13748	3.01636	3.71731			-1.06667e-16	1.89875	2.90083
PRLR			-1.27581						-0.852803
PRMT5										0.313363
PRNP									1.95962
probucol		0.2			-1.1767			0.784465	-0.218218	-0.218218
PROC	0.625333	-1.15169	-1.36026	-1.73895	-1.93779		-1.46018		-2.37598
progesterone	1.84918	0.985096	1.5179	1.8937	1.11624		1.16674	1.409	1.2991	0.762646
Pro-inflammatory Cytokine	-0.624695	1.62536	2.13719	0.925899	1.71823				2.2	1.09109
propofol	1.27581	0.777618	-0.0465746	-0.963338	-0.941327		1.1717		0.872872	0.872872
propranolol	-1.20593	0.911331		0	-0.912321		-0.254457
propylthiouracil	0.27735	0.417585	9.42055e-17	1.38675	1.446				1.28534	1.15404
prostaglandin				0.152499	0.152499
prostaglandin A1		-6.11724e-17		-0.491076
prostaglandin A2			0.53581
prostaglandin D2										1.96089
[truncated: 619 more rows]
